# Supplementary material for: Modular synthesis of fluorinated 2H-thiophenes via [4 + 1] cyclization of enaminothiones
Source: Royal Society of Chemistry journal article supplement (doi:10.1039/d3ob00222e), 2023-01-01

## Supporting Information

# Modular Synthesis of Fluorinated 2*H*-Thiophenes via [4+1] Cyclization of Enaminothiones

Xinyu Zhang, Jinli Zhang, Jie Chen, Banghua Zhou, Jian Zhang, Shunhong Chen, Jian Wu\*  
and Yaojia Jiang\*

### Table of Contents

|                                                                          |    |
|--------------------------------------------------------------------------|----|
| 1. General methods -----                                                 | 2  |
| 2. Optimized reaction conditions -----                                   | 3  |
| 3. General procedure and spectral data -----                             | 4  |
| 3.1 General procedure for enaminothiones and their spectral data -----   | 4  |
| 3.2 General procedure for hydrazones and their spectral data -----       | 13 |
| 3.3 General procedure for 2-CF <sub>3</sub> -2 <i>H</i> -thiophenes----- | 14 |
| 3.4 Derivative products and their spectral data -----                    | 31 |
| 4. NMR spectra -----                                                     | 35 |
| 4.1 NMR spectra for enaminothiones -----                                 | 35 |
| 4.2 NMR spectra for hydrazones -----                                     | 55 |
| 4.3 NMR spectra for 2-CF <sub>3</sub> -2 <i>H</i> -thiophenes -----      | 56 |
| 4.4 NMR spectra for derivative products -----                            | 97 |

## 1. General methods:

All reactions were carried out in flame or oven-dried glassware under argon atmosphere with freshly distilled dry solvents under anhydrous conditions unless otherwise indicated. Flash column chromatography was performed with silica gel 60 (230 – 400 mesh). Chromatograms were visualized by fluorescence quenching with UV light at 254 nm or by staining with base solution of potassium permanganate and molybdate. NMR spectra were recorded at RT on 300 or 400 MHz Bruker spectrometers. The residual solvent signals were taken as the reference (0.00 ppm for  $^1\text{H}$  NMR spectra and 77.0 ppm for  $^{13}\text{C}$  NMR spectra in  $\text{CDCl}_3$ ). Chemical shift ( $\delta$ ) is reported in ppm, coupling constants ( $J$ ) are given in Hz. The following abbreviations classify the multiplicity: s = singlet, d = doublet, t = triplet, m = multiplet, dd = doublet of doublet, q = quartet and br = broad signal. HRMS (ESI) spectra were recorded on a Waters Q-Tof premier TM mass spectrometer.

## 2. Optimized reaction conditions:

Table S1 Optimized reaction conditions<sup>a</sup>

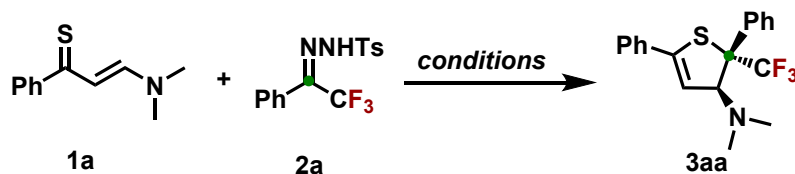

| Entry | Metal Catalyst   | Base                           | Solvent           | temp | Yield (%) |
|-------|------------------|--------------------------------|-------------------|------|-----------|
| 1     | CuI              | <sup>t</sup> BuOK              | DCM               | 80   | 31        |
| 2     | CuBr             | <sup>t</sup> BuOK              | DCM               | 80   | 28        |
| 3     | CuCl             | <sup>t</sup> BuOK              | DCM               | 80   | 36        |
| 4     | CuF <sub>2</sub> | <sup>t</sup> BuOK              | DCM               | 80   | 29        |
| 5     | CuCl             | <sup>t</sup> BuOK              | MeOH              | 80   | 38        |
| 6     | CuCl             | <sup>t</sup> BuOK              | IPA               | 80   | 37        |
| 7     | CuCl             | <sup>t</sup> BuOK              | Tol.              | 80   | 39        |
| 8     | CuCl             | NaOH                           | Tol.              | 80   | 45        |
| 9     | CuCl             | K <sub>2</sub> CO <sub>3</sub> | Tol.              | 80   | 51        |
| 10    | CuCl             | K <sub>2</sub> CO <sub>3</sub> | Tol.              | 90   | 58        |
| 11    | CuCl             | K <sub>2</sub> CO <sub>3</sub> | Tol.              | 100  | 41        |
| 12    | CuSCN            | <sup>t</sup> BuOK              | DCE               | 80   | 10        |
| 13    | CuSCN            | <sup>t</sup> BuOK              | DCM               | 80   | 12        |
| 14    | CuSCN            | <sup>t</sup> BuOK              | PhCH <sub>3</sub> | 80   | 14        |
| 15    | CuSCN            | <sup>t</sup> BuOK              | PhCl              | 80   | 13        |
| 16    | CuSCN            | <sup>t</sup> BuOK              | THF               | 80   | 27        |
| 17    | CuSCN            | <sup>t</sup> BuOK              | MeOH              | 80   | 19        |

<sup>a</sup>If there is no otherwise noted, the reaction is performed as follows: **1a** (0.20 mmol, 1.0 equiv.), **2a** (0.48 mmol, 2.4 equiv.), metal catalyst (1.0 mol %) and base (0.50 mmol, 2.5 equiv.) were mixed with 2.0 mL solvent in sealed tube under argon atmosphere, and the obtained mixture was stirred at 90 °C until **1a** was consumed completely. <sup>b</sup> Isolated yield. <sup>c</sup> Metal catalyst-loading: 10 mol %. Oct = octanoate, TFA = trifluoroacetic acid, esp =  $\alpha,\alpha,\alpha',\alpha'$ -tetramethyl-1,3-benzenedipropionic acid, DBU = 1,8-diazabicyclo[5.4.0]undec-7-ene, DIPEA = N,N-diisopropylethylamine. Tol. = toluene, THF = tetrahydrofuran, ACN = acetonitrile, DCM = dichloromethane.

### 3. General procedure and spectral data

#### 3.1 General procedure for the synthesis of enaminothione and their spectral data<sup>1</sup>:

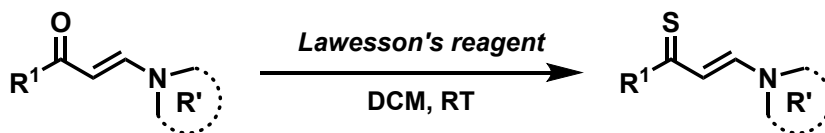

To a stirred solution of Lawesson's reagent (1 mmol, 0.5 equiv.) in DCM (20 ml), the enaminone (2 mmol, 1.0 equiv.) was added. The reaction mixture was stirred at room temperature until complete conversion monitored by TLC (30-60 min), and then the solvent was removed under reduced pressure to afford a yellow or brown residue that was purified by flash column chromatography. The desired enaminothiones were obtained.

#### **(E)-3-(Dimethylamino)-1-phenylprop-2-ene-1-thione (1a):**

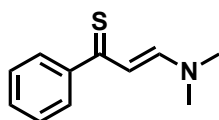

The title compound was prepared according to the general procedure. The product was obtained as red solid, Mp. 102 - 104 °C. Yield: 92% (351.9 mg); <sup>1</sup>H NMR (400 MHz, CDCl<sub>3</sub>) δ 8.41 (d, *J* = 10.4 Hz, 1H), 7.81 (s, 2H), 7.45 – 7.27 (m, 3H), 6.52 (d, *J* = 10.6 Hz, 1H), 3.25 (s, 3H), 3.00 (s, 3H); <sup>13</sup>C NMR (100 MHz, CDCl<sub>3</sub>) δ 215.3, 157.8, 148.3, 130.3, 128.0, 127.3, 111.3, 46.3, 38.6; HRMS (ESI) *m/z* [M+H]<sup>+</sup>: Calcd for C<sub>11</sub>H<sub>14</sub>NS: 192.0847. Found: 192.0840.

---

<sup>1</sup> R. Shabana, J. B. Rasmussen, S. O. Olesen and S.-O. Lawesson, *Tetrahedron*, 1980, **36**, 3047-3051.



**(E)-3-(Dimethylamino)-1-(p-tolyl) prop-2-ene-1-thione (1b):**

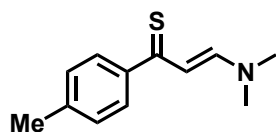

The title compound was prepared according to the general procedure. The product was obtained as red solid, Mp. 122 - 124 °C. Yield: 81% (332.6 mg); <sup>1</sup>H NMR (400 MHz, CDCl<sub>3</sub>) δ 8.39 (s, 1H), 7.75 (s, 2H), 7.12 (d, *J* = 7.9 Hz, 2H), 6.53 (d, *J* = 9.4 Hz, 1H), 3.23 (s, 3H), 2.99 (s, 3H), 2.34 (s, 3H); <sup>13</sup>C NMR (100 MHz, CDCl<sub>3</sub>) δ 214.7, 157.7, 145.4, 140.7, 128.6, 127.5, 110.8, 46.2, 38.5, 21.5; HRMS (ESI) *m/z* [M+H]<sup>+</sup>: Calcd for C<sub>12</sub>H<sub>16</sub>NS: 206.1004. Found: 206.1003.

**(E)-3-(Dimethylamino)-1-(4-methoxyphenyl) prop-2-ene-1-thione (1c):**

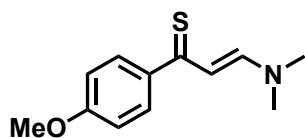

The title compound was prepared according to the general procedure. The product was obtained as faint yellow solid, Mp. 96 - 98 °C. Yield: 85% (362.8 mg); <sup>1</sup>H NMR (400 MHz, CDCl<sub>3</sub>) δ 8.38 (s, 1H), 7.86 (s, 2H), 6.88 – 6.81 (m, 2H), 6.55 (d, *J* = 16.5 Hz, 1H), 3.83 (s, 3H), 3.24 (s, 3H), 3.02 (s, 3H); <sup>13</sup>C NMR (100 MHz, CDCl<sub>3</sub>) δ 161.8, 140.6, 129.4, 113.1, 55.6, 46.2, 38.4; HRMS (ESI) *m/z* [M+H]<sup>+</sup>: Calcd for C<sub>12</sub>H<sub>16</sub>NOS: 222.0953. Found: 222.0946.

**(E)-3-(Dimethylamino)-1-(4-phenoxyphenyl)prop-2-ene-1-thione (1d):**

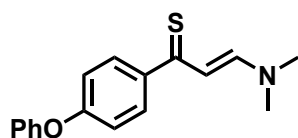

The title compound was prepared according to the general procedure (EA/PE = 1/1.5,  $R_f = 0.1$ ). The product was obtained as red solid, Mp. 125 – 127 °C. Yield: 60% (339.0 mg);  $^1\text{H NMR}$  (400 MHz,  $\text{CDCl}_3$ )  $\delta$  8.42 (s, 1H), 7.86 (s, 2H), 7.38 – 7.33 (m, 2H), 7.18 – 7.10 (m, 1H), 7.08 – 7.03 (m, 2H), 6.97 – 6.90 (m, 2H), 6.56 (d,  $J = 11.0$  Hz, 1H), 3.28 (s, 3H), 3.05 (s, 3H);  $^{13}\text{C NMR}$  (100 MHz,  $\text{CDCl}_3$ )  $\delta$  156.4, 129.8, 129.1, 123.7, 119.4, 117.4, 46.1, 38.2; HRMS (ESI)  $m/z$   $[\text{M}+\text{H}]^+$ : Calcd for  $\text{C}_{17}\text{H}_{17}\text{NOS}$ : 284.1109. Found: 284.1104.

**(E)-4-(3-(Dimethylamino) prop-2-enethioyl) benzonitrile (1e):**

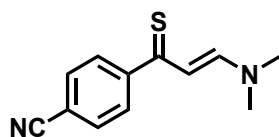

The title compound was prepared according to the general procedure, The product was obtained as red solid, Mp. 99 - 102 °C. Yield: 83% (359.1 mg);  $^1\text{H NMR}$  (400 MHz,  $\text{CDCl}_3$ )  $\delta$  8.42 (d,  $J = 11.4$  Hz, 1H), 7.83 (d,  $J = 8.2$  Hz, 2H), 7.62 – 7.58 (m, 2H), 6.49 (d,  $J = 11.4$  Hz, 1H), 3.33 (s, 3H), 3.07 (s, 3H);  $^{13}\text{C NMR}$  (100 MHz,  $\text{CDCl}_3$ )  $\delta$  212.1, 158.3, 152.0, 131.9, 127.6, 119.0, 112.9, 111.6, 46.7, 38.8; HRMS (ESI)  $m/z$   $[\text{M}+\text{H}]^+$ : Calcd for  $\text{C}_{12}\text{H}_{13}\text{N}_2\text{S}$ : 217.0799. Found: 217.0794.

**Methyl (E)-4-(3-(dimethylamino)prop-2-enethioyl)benzoate(1f):**

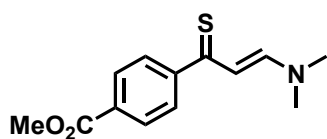

The title compound was prepared according to the general procedure, The product was obtained as faint yellow solid, Mp. 96 - 98 °C. Yield: 73% (363.5 mg); <sup>1</sup>H NMR (400 MHz, CDCl<sub>3</sub>) δ 8.45 (d, *J* = 11.4 Hz, 1H), 8.07 – 7.95 (m, 2H), 7.90 – 7.78 (m, 2H), 6.48 (d, *J* = 11.4 Hz, 1H), 3.93 (s, 3H), 3.33 (s, 3H), 3.08 (s, 3H); <sup>13</sup>C NMR (100 MHz, CDCl<sub>3</sub>) δ 166.8, 157.4, 129.2, 126.9, 111.5, 99.9, 52.2, 46.3, 38.5; HRMS (ESI) *m/z* [M+H]<sup>+</sup>: Calcd for C<sub>12</sub>H<sub>16</sub>NOS: 250.0902. Found: 250.0909.

**(*E*)-3-(Dimethylamino)-1-(4-nitrophenyl)prop-2-ene-1-thione (1g):**

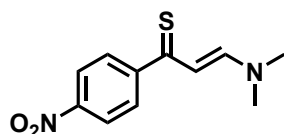

The title compound was prepared according to the general procedure. The product was obtained as red solid, Mp. 122 - 123 °C. Yield: 60% (283.0 mg); <sup>1</sup>H NMR (400 MHz, CDCl<sub>3</sub>) δ 8.35 (d, *J* = 11.3 Hz, 1H), 8.07 (d, *J* = 8.8 Hz, 2H), 7.80 (d, *J* = 8.6 Hz, 2H), 6.45 (d, *J* = 11.3 Hz, 1H), 3.29 (s, 3H), 3.03 (s, 3H); <sup>13</sup>C NMR (100 MHz, CDCl<sub>3</sub>) δ 210.6, 158.0, 153.4, 147.8, 127.5, 122.9, 111.7, 46.4, 38.6; HRMS (ESI) *m/z* [M+H]<sup>+</sup>: Calcd for C<sub>11</sub>H<sub>13</sub>N<sub>2</sub>O<sub>2</sub>S: 237.0698. Found: 237.0700.

**(*E*)-3-(Dimethylamino)-1-(4-fluorophenyl) prop-2-ene-1-thione (1h):**

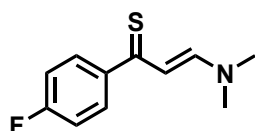

The title compound was prepared according to the general procedure. The product was obtained as red solid, Mp. 99 - 100 °C. Yield: 91% (380.9 mg); <sup>1</sup>H NMR (400 MHz,

CDCl<sub>3</sub>)  $\delta$  8.38 (s, 1H), 7.83 (s, 2H), 7.00 – 6.95 (m, 2H), 6.58 – 6.37 (m, 1H), 3.25(s, 3H), 3.00 (s, 3H); <sup>13</sup>C NMR (100 MHz, CDCl<sub>3</sub>)  $\delta$  212.9, 165.5, 158.1, 144.3, 129.5 (d,  $J$  = 6.9 Hz), 114.8 (d,  $J$  = 21.5 Hz), 110.8, 46.4, 38.6; <sup>19</sup>F NMR (376 MHz, CDCl<sub>3</sub>)  $\delta$  - 111.00; HRMS (ESI)  $m/z$  [M+H]<sup>+</sup>: Calcd for C<sub>11</sub>H<sub>13</sub>FNS: 210.0753. Found: 210.0746.

**(E)-1-(4-Chlorophenyl)-3-(dimethylamino) prop-2-ene-1-thione (1i):**

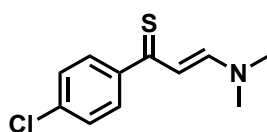

The title compound was prepared according to the general procedure. The product was obtained as red solid, Mp. 113 - 114 °C. Yield: 88% (397.3 mg); <sup>1</sup>H NMR (400 MHz, CDCl<sub>3</sub>)  $\delta$  8.37 (d,  $J$  = 10.9 Hz, 1H), 7.85 – 7.65 (m, 2H), 7.37 – 7.16 (m, 2H), 6.47 (d,  $J$  = 10.9 Hz, 1H), 3.25 (s, 3H), 3.00 (s, 3H); <sup>13</sup>C NMR (100 MHz, CDCl<sub>3</sub>)  $\delta$  212.6, 158.2, 146.4, 136.2, 128.7, 128.1, 110.9, 46.5, 38.7; HRMS (ESI)  $m/z$  [M+H]<sup>+</sup>: Calcd for C<sub>11</sub>H<sub>13</sub>ClNS: 226.0457. Found: 226.0451.

**(E)-1-(4-Bromophenyl)-3-(dimethylamino) prop-2-ene-1-thione (1j):**

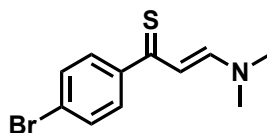

The title compound was prepared according to the general procedure. The product was obtained as red solid, Mp. 110 - 111 °C. Yield: 91% (491.7 mg); <sup>1</sup>H NMR (400 MHz, CDCl<sub>3</sub>)  $\delta$  8.38 (d,  $J$  = 10.7 Hz, 1H), 7.76 – 7.63 (m, 2H), 7.46 – 7.39 (m, 2H), 6.48 (d,  $J$  = 11.0 Hz, 1H), 3.27 (s, 3H), 3.01 (s, 3H); <sup>13</sup>C NMR (100 MHz, CDCl<sub>3</sub>)  $\delta$  212.7,

158.2, 146.9, 131.0, 128.5, 124.7, 110.9, 46.5, 38.7; HRMS (ESI)  $m/z$   $[M+H]^+$ : Calcd for  $C_{11}H_{13}BrNS$ : 269.9952. Found: 269.9944.

**(E)-3-(Dimethylamino)-1-(4-iodophenyl) prop-2-ene-1-thione (1k):**

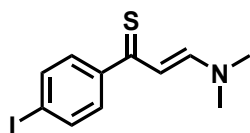

The title compound was prepared according to the general procedure. The product was obtained as red solid, Mp. 139 - 140 °C. Yield: 81% (513.8 mg);  $^1H$  NMR (400 MHz,  $CDCl_3$ )  $\delta$  8.40 (d,  $J = 10.5$  Hz, 1H), 7.75 – 7.62 (m, 2H), 7.55 (d,  $J = 6.4$  Hz, 2H), 6.48 (d,  $J = 10.9$  Hz, 1H), 3.29 (s, 3H), 3.03 (s, 3H);  $^{13}C$  NMR (100 MHz,  $CDCl_3$ )  $\delta$  213.3, 158.1, 147.5, 137.0, 129.0, 110.9, 97.0, 46.5, 38.7; HRMS (ESI)  $m/z$   $[M+H]^+$ : Calcd for  $C_{11}H_{13}INS$ : 317.9813. Found: 317.9807.

**(1E, 4E)-1-(Dimethylamino)-5-phenylpenta-1, 4-diene-3-thione (1l):**

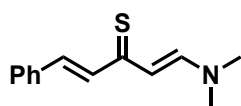

The title compound was prepared according to the general procedure. The product was obtained as red solid, Mp. 105 - 107 °C. Yield: 80% (347.7 mg);  $^1H$  NMR (400 MHz,  $CDCl_3$ )  $\delta$  8.47 (s, 1H), 7.80 (d,  $J = 15.4$  Hz, 1H), 7.59 (d,  $J = 7.6$  Hz, 2H), 7.38 – 7.31 (m, 3H), 7.29 – 7.22 (m, 1H), 6.34 (d,  $J = 11.7$  Hz, 1H), 3.27 (s, 3H), 3.04 (s, 3H);  $^{13}C$  NMR (100 MHz,  $CDCl_3$ )  $\delta$  169.1, 144.0, 136.2, 136.0, 128.4, 79.8, 79.4; HRMS (ESI)  $m/z$   $[M+H]^+$ : Calcd for  $C_{13}H_{16}NS$ : 218.1003. Found: 218.0998.

**(E)-3-(Dimethylamino)-1-(furan-2-yl)prop-2-ene-1-thione (1m):**

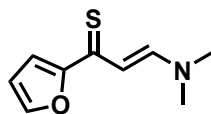

The title compound was prepared according to the general procedure (EA/PE = 1/1.5,  $R_f = 0.1$ ). The product was obtained as red solid, Mp. 90 – 92 °C. Yield: 60% (218.5 mg);  $^1\text{H NMR}$  (400 MHz,  $\text{CDCl}_3$ )  $\delta$  8.43 (d,  $J = 11.8$  Hz, 1H), 7.52 (dd,  $J_1 = 1.7$  Hz,  $J_2 = 0.8$  Hz, 1H), 7.39 (dd,  $J_1 = 3.5$  Hz,  $J_2 = 0.8$  Hz, 1H), 6.80 (d,  $J = 11.7$  Hz, 1H), 6.48 (dd,  $J_1 = 3.5$  Hz,  $J_2 = 1.7$  Hz, 1H), 3.30 (s, 3H), 3.08 (s, 3H);  $^{13}\text{C NMR}$  (100 MHz,  $\text{CDCl}_3$ )  $\delta$  194.2, 159.1, 157.6, 144.2, 116.0, 113.0, 107.3, 46.1, 38.3; HRMS (ESI)  $m/z$   $[\text{M}+\text{H}]^+$ : Calcd for  $\text{C}_9\text{H}_{12}\text{NOS}$ : 182.0640. Found: 182.0634.

**(E)-3-(Dimethylamino)-1-(thiophen-2-yl) prop-2-ene-1-thione (1n):**

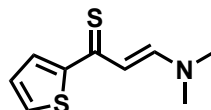

The title compound was prepared according to the general procedure. The product was obtained as red solid, Mp. 129 - 131 °C. Yield: 84% (331.4 mg);  $^1\text{H NMR}$  (400 MHz,  $\text{CDCl}_3$ )  $\delta$  8.36 (d,  $J = 11.5$  Hz, 1H), 7.61 (dd,  $J_1 = 1.0$  Hz,  $J_2 = 3.8$  Hz, 1H), 7.49 (dd,  $J_1 = 1.2$  Hz,  $J_2 = 5.2$  Hz, 1H), 7.07 (dd,  $J_1 = 3.8$  Hz,  $J_2 = 5.1$  Hz, 1H), 6.62 (d,  $J = 11.5$  Hz, 1H), 3.26 (s, 3H), 3.04 (s, 3H);  $^{13}\text{C NMR}$  (100 MHz,  $\text{CDCl}_3$ )  $\delta$  201.2, 157.9, 154.7, 132.9, 128.1, 125.4, 108.0, 46.3, 38.5; HRMS (ESI)  $m/z$   $[\text{M}+\text{H}]^+$ : Calcd for  $\text{C}_9\text{H}_{12}\text{NS}_2$ : 198.0411. Found: 198.0414.

**(E)-1-(Benzo[b]thiophen-2-yl)-3-(dimethylamino)prop-2-ene-1-thione(1o):**

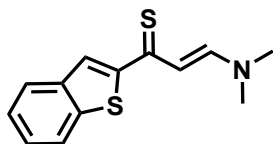

The title compound was prepared according to the general procedure. The product was obtained as red solid, Mp. 195 - 197 °C. Yield: 60% (296.4 mg);  $^1\text{H}$  NMR (400 MHz,  $\text{CDCl}_3$ )  $\delta$  8.38 (d,  $J = 11.5$  Hz, 1H), 7.86 (s, 1H), 7.83 – 7.75 (m, 2H), 7.40 – 7.28 (m, 2H), 6.77 (d,  $J = 11.7$  Hz, 1H), 3.28 (s, 3H), 3.08 (s, 3H);  $^{13}\text{C}$  NMR (100 MHz,  $\text{CDCl}_3$ )  $\delta$  197.6, 157.5, 142.9, 139.9, 125.9, 125.4, 124.5, 122.3, 121.6, 46.2, 38.4, 29.7; HRMS (ESI)  $m/z$   $[\text{M}+\text{H}]^+$ : Calcd for  $\text{C}_{13}\text{H}_{14}\text{NS}_2$ : 248.0568. Found: 248.0562.

**(E)-3-(Dimethylamino)-1-(phenanthren-2-yl)prop-2-ene-1-thione(1p):**

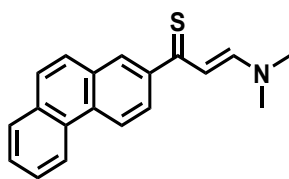

The title compound was prepared according to the general procedure. The product was obtained as red solid, Mp. 169 - 170 °C. Yield: 84% (489.5 mg);  $^1\text{H}$  NMR (400 MHz,  $\text{CDCl}_3$ )  $\delta$  8.67 (d,  $J = 8.0$  Hz, 1H), 8.62 (d,  $J = 8.7$  Hz, 1H), 8.55 – 8.30 (m, 2H), 8.18 (s, 1H), 7.89 – 7.87 (m, 1H), 7.83 – 7.71 (m, 2H), 7.69 – 7.56 (m, 2H), 6.73 (d,  $J = 11.2$  Hz, 1H), 3.22 (s, 3H), 3.02 (s, 3H);  $^{13}\text{C}$  NMR (100 MHz,  $\text{CDCl}_3$ )  $\delta$  213.9, 157.9, 145.8, 132.6, 131.7, 131.5, 130.1, 128.8, 127.7, 127.5, 127.3, 127.2, 126.9, 126.1, 123.2, 122.4, 111.4, 46.3, 38.7; HRMS (ESI)  $m/z$   $[\text{M}+\text{H}]^+$ : Calcd for  $\text{C}_{19}\text{H}_{18}\text{NS}$ : 292.1160. Found: 292.1153.

**(E)-1-(Adamantan-1-yl)-3-(dimethylamino) prop-2-ene-1-thione (1q):**

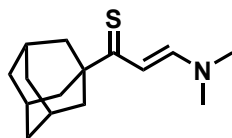

The title compound was prepared according to the general procedure. The product was obtained as red solid, Mp. 144 - 146 °C. Yield: 73% (364.1 mg);  $^1\text{H}$  NMR (400 MHz,  $\text{CDCl}_3$ )  $\delta$  8.37 (d,  $J = 11.4$  Hz, 1H), 6.27 (d,  $J = 11.4$  Hz, 1H), 3.21 (s, 3H), 2.97 (s, 3H), 2.04 (s, 3H), 2.01 – 1.94 (m, 6H), 1.69 (s, 6H);  $^{13}\text{C}$  NMR (100 MHz,  $\text{CDCl}_3$ )  $\delta$  158.0, 108.7, 48.7, 43.2, 38.3, 36.9, 29.2; HRMS (ESI)  $m/z$   $[\text{M}+\text{H}]^+$ : Calcd for  $\text{C}_{15}\text{H}_{24}\text{NS}$ : 250.1630. Found: 250.1627.

**(E)-1-(Dimethylamino)-5-phenylpent-1-ene-3-thione (1r):**

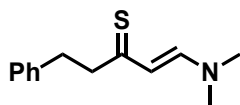

The title compound was prepared according to the general procedure. The product was obtained as red oil. Yield: 42% (182.6 mg);  $^1\text{H}$  NMR (400 MHz,  $\text{CDCl}_3$ )  $\delta$  8.22 (d,  $J = 10.8$  Hz, 1H), 7.32 – 7.20 (m, 4H), 7.15 – 7.09 (m, 1H), 5.97 (d,  $J = 11.4$  Hz, 1H), 3.14 (s, 3H), 3.00 (s, 3H), 2.92 – 2.75 (m, 4H);  $^{13}\text{C}$  NMR (100 MHz,  $\text{CDCl}_3$ )  $\delta$  223.0, 156.9, 141.4, 128.2, 128.0, 125.5, 111.8, 53.3, 45.7, 37.9, 36.7; HRMS (ESI)  $m/z$   $[\text{M}+\text{H}]^+$ : Calcd for  $\text{C}_{13}\text{H}_{18}\text{NS}$ : 220.1160. Found: 220.1160.

**(E)-1-Phenyl-3-(pyrrolidin-1-yl) prop-2-ene-1-thione (1s):**

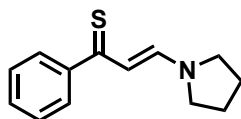

The title compound was prepared according to the general procedure. The product was



obtained as red solid, Mp. 121 - 123 °C. Yield: 78% (339.3 mg);  $^1\text{H}$  NMR (400 MHz,  $\text{CDCl}_3$ )  $\delta$  8.65 (d,  $J = 10.9$  Hz, 1H), 7.84 (d,  $J = 7.3$  Hz, 2H), 7.41 – 7.30 (m, 3H), 6.51 (d,  $J = 11.2$  Hz, 1H), 3.72 (t,  $J = 6.0$  Hz, 2H), 3.40 (t,  $J = 6.6$  Hz, 2H), 2.14 – 1.92 (m, 4H);  $^{13}\text{C}$  NMR (100 MHz,  $\text{CDCl}_3$ )  $\delta$  214.1, 153.3, 148.1, 129.9, 127.7, 127.1, 112.1, 53.4, 48.2, 24.9; HRMS (ESI)  $m/z$   $[\text{M}+\text{H}]^+$ : Calcd for  $\text{C}_{13}\text{H}_{16}\text{NS}$ : 218.1003. Found: 218.0998.

### 3.2 General procedure for hydrazones and their spectral data<sup>2</sup>:

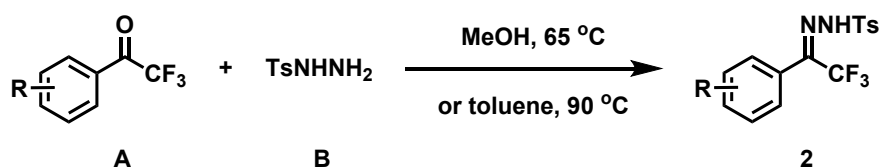

To a round bottom flask surmounted with a reflux condenser was added N-tosylhydrazide **B** (5.0 mmol, 1.0 equiv.) and the minimum quantity of solvent (either methanol or toluene according to individual substrates) needed to dissolve the hydrazide at reflux (approximately 1.5 M). Subsequently the reaction was cooled to room temperature and trifluoroacetophenone **A** (5.0 mmol, 1.0 equiv.) was added in one portion. The reaction mixture was then stirred at 65 °C (MeOH) or 90 °C (Toluene) over 4-16 h (monitor by TLC). The solution was cooled down to 0 °C, at which point the product precipitated out of solution in most cases (precipitation can be induced by addition of pentane). The precipitate was collected by vacuum filtration and washed with pentane, in which case it was used without further purification. If no precipitation occurred, the solvent was removed under reduced pressure and the residue used in the

<sup>2</sup> X. Liang, P. Guo, W. Yang, M. Li, C. Jiang, W. Sun, T.-P. Loh and Y. Jiang, *Chem. Commun.*, 2020, **56**, 2043-2046.

next step without further purification.

### *N'*-(1-(9*H*-fluoren-3-yl)-2,2,2-trifluoroethylidene)-4-

### methylbenzenesulfonohydrazide (**2h**):

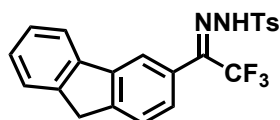

The title compound was prepared according to the general procedure (EA/PE = 1/1.5,  $R_f = 0.4$ ). The product was obtained as yellow solid, Mp. 82 – 85 °C. Yield: 86% (1853.8 mg);  $^1\text{H}$  NMR (400 MHz,  $\text{CDCl}_3$ )  $\delta$  8.10 – 8.04 (m, 1H), 7.93 – 7.88 (m, 1H), 7.89 – 7.80 (m, 3H), 7.63 – 7.57 (m, 1H), 7.47 – 7.32 (m, 5H), 7.29 – 7.21 (m, 1H), 3.95 (s, 2H), 2.47 (s, 3H);  $^{13}\text{C}$  NMR (100 MHz,  $\text{CDCl}_3$ )  $\delta$  145.0, 144.9, 144.7, 143.6, 140.0, 134.5, 129.8, 128.2, 128.0, 127.2, 126.8, 125.2, 124.7, 122.8, 121.1, 120.6, 36.9, 21.7;  $^{19}\text{F}$  NMR (376 MHz,  $\text{CDCl}_3$ )  $\delta$  -67.95; HRMS (ESI)  $m/z$   $[\text{M}+\text{H}]^+$ : Calcd for  $\text{C}_{22}\text{H}_{18}\text{F}_3\text{N}_2\text{O}_2\text{S}$ : 431.1041. Found: 431.1047. The spectroscopic properties of the other compounds were consistent with literature data<sup>2</sup>.

### 3.3 General procedure for 2- $\text{CF}_3$ -2*H*-thiophenes and their spectral data:

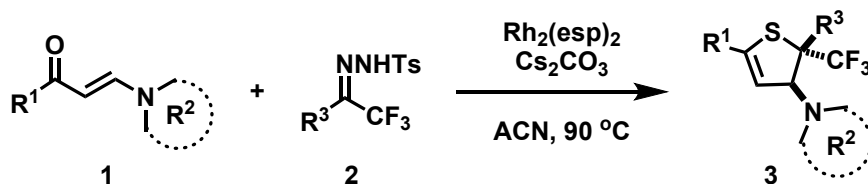

A mixture of **1** (0.2 mmol, 1.0 equiv.), **2** (0.48 mmol, 2.4 equiv.),  $\text{Rh}_2(\text{esp})_2$  (0.002 mmol, 1 mol%),  $\text{Cs}_2\text{CO}_3$  (0.5 mmol, 2.5 equiv.) and acetonitrile (4 mL) was sealed in a Schlenk tube under Argon protection at 90 °C and the mixture was stirred for 20 h or

until the **1** was consumed completely. Then the reaction mixture was filtered by diatomite and concentrated under reduced pressure and purified by column chromatography (EA/PE = 1:20) to give the desired product **3**.

**(2*S*,3*S*)-*N,N*-Dimethyl-2,5-diphenyl-2-(trifluoromethyl)-2,3-dihydrothiophen-3-amine (3aa):**

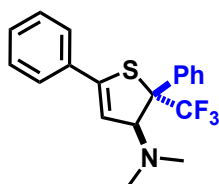

The title compound was prepared according to the general procedure (EA/PE = 1/20,  $R_f = 0.5$ ). The product was obtained as yellow solid, Mp. 131 – 133 °C. Yield: 91% (63.7 mg);  $^1\text{H}$  NMR (400 MHz,  $\text{CDCl}_3$ )  $\delta$  7.60 – 7.57 (m, 4H), 7.42 – 7.33 (m, 6H), 6.14 (d,  $J = 3.2$  Hz, 1H), 4.59 (d,  $J = 3.2$  Hz, 1H), 2.15 (s, 6H);  $^{13}\text{C}$  NMR (100 MHz,  $\text{CDCl}_3$ )  $\delta$  141.8, 132.9, 132.2, 131.1 (q,  $J = 1.4$  Hz), 128.9, 128.6, 128.3, 128.2, 126.8, 126.6, 113.8, 73.3 (q,  $J = 1.5$  Hz);  $^{19}\text{F}$  NMR (376 MHz,  $\text{CDCl}_3$ )  $\delta$  -75.25; HRMS (ESI)  $m/z$   $[\text{M}+\text{H}]^+$ : Calcd for  $\text{C}_{19}\text{H}_{19}\text{F}_3\text{NS}$ : 350.1190. Found: 350.1181.

**(2*S*,3*S*)-*N,N*-Dimethyl-2-phenyl-5-(*p*-tolyl)-2-(trifluoromethyl)-2,3-dihydrothiophen-3-amine (3ab):**

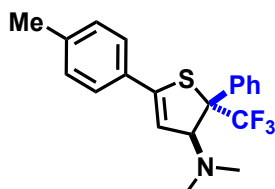

The title compound was prepared according to the general procedure (EA/PE = 1/20,  $R_f = 0.6$ ). The product was obtained as yellow solid, Mp. 95 – 96 °C. Yield: 82% (59.7

mg);  $^1\text{H}$  NMR (400 MHz,  $\text{CDCl}_3$ )  $\delta$  7.62 – 7.55 (m, 2H), 7.50 – 7.44 (m, 2H), 7.37 – 7.32 (m, 3H), 7.22 – 7.17 (m, 2H), 6.09 (d,  $J = 3.1$  Hz, 1H), 4.57 (d,  $J = 3.1$  Hz, 1H), 2.38 (s, 3H), 2.13 (s, 6H);  $^{13}\text{C}$  NMR (100 MHz,  $\text{CDCl}_3$ )  $\delta$  139.0, 132.3, 131.1 (q,  $J = 1.6$  Hz), 130.1, 129.3, 128.6, 128.0, 126.8, 126.5, 112.9, 73.2 (q,  $J = 1.3$  Hz), 21.3;  $^{19}\text{F}$  NMR (376 MHz,  $\text{CDCl}_3$ )  $\delta$  -75.22; HRMS (ESI)  $m/z$   $[\text{M}+\text{H}]^+$ : Calcd for  $\text{C}_{20}\text{H}_{21}\text{F}_3\text{NS}$ : 364.1347. Found: 364.1341.

**(2*S*,3*S*)-5-(4-Methoxyphenyl)-*N,N*-dimethyl-2-phenyl-2-(trifluoromethyl)-2,3-dihydrothiophen-3-amine (3ac):**

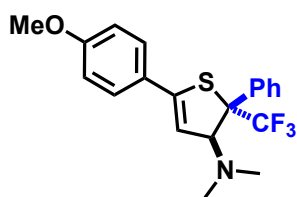

The title compound was prepared according to the general procedure (EA/PE = 1/20,  $R_f = 0.5$ ). The product was obtained as red solid, Mp. 90 – 92 °C. Yield: 93% (70.7 mg);  $^1\text{H}$  NMR (400 MHz,  $\text{CDCl}_3$ )  $\delta$  7.59 – 7.57 (m, 2H), 7.54 – 7.49 (m, 2H), 7.36 – 7.30 (m, 3H), 6.94 – 6.90 (m, 2H), 6.01 (d,  $J = 3.1$  Hz, 1H), 4.56 (d,  $J = 3.1$  Hz, 1H), 3.84 (s, 3H), 2.13 (s, 6H);  $^{13}\text{C}$  NMR (100 MHz,  $\text{CDCl}_3$ )  $\delta$  160.2, 141.3, 132.3, 131.1 (q,  $J = 1.6$  Hz), 128.0, 127.9, 126.8, 125.6, 114.0, 111.9, 73.3 (q,  $J = 1.5$  Hz), 55.4;  $^{19}\text{F}$  NMR (376 MHz,  $\text{CDCl}_3$ )  $\delta$  -75.12; HRMS (ESI)  $m/z$   $[\text{M}+\text{H}]^+$ : Calcd for  $\text{C}_{20}\text{H}_{21}\text{F}_3\text{NOS}$ : 380.1296. Found: 380.1292.

**(2*S*,3*S*)-*N,N*-Dimethyl-5-(4-phenoxyphenyl)-2-phenyl-2-(trifluoromethyl)-2,3-dihydrothiophen-3-amine (3ad):**

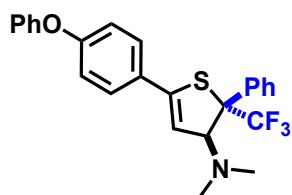

The title compound was prepared according to the general procedure (EA/PE = 1/20,  $R_f$  = 0.6). The product was obtained as red solid, Mp. 123 – 133 °C. Yield: 85% (75.2 mg);  $^1\text{H}$  NMR (400 MHz,  $\text{CDCl}_3$ )  $\delta$  7.58 – 7.53 (m, 4H), 7.39 – 7.32 (m, 5H), 7.19 – 7.13 (m, 1H), 7.06 – 7.00 (m, 4H), 6.07 (d,  $J$  = 3.1 Hz, 1H), 4.58 (d,  $J$  = 3.1 Hz, 1H), 2.14 (s, 6H);  $^{13}\text{C}$  NMR (100 MHz,  $\text{CDCl}_3$ )  $\delta$  158.0, 156.6, 141.0, 132.1, 131.1 (q,  $J$  = 1.3 Hz), 129.9, 128.1, 128.1, 128.1, 127.9, 126.8, 123.7, 119.2, 118.6, 113.0, 73.2 (q,  $J$  = 1.5 Hz);  $^{19}\text{F}$  NMR (376 MHz,  $\text{CDCl}_3$ )  $\delta$  -75.27; HRMS (ESI)  $m/z$   $[\text{M}+\text{H}]^+$ : Calcd for  $\text{C}_{25}\text{H}_{23}\text{F}_3\text{NOS}$ : 442.1452. Found: 442.1447.

**4-((4S,5S)-4-(Dimethylamino)-5-phenyl-5-(trifluoromethyl)-4,5-dihydrothiophen-2-yl)benzonitrile (3ae):**

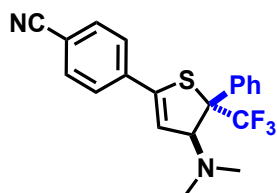

The title compound was prepared according to the general procedure (EA/PE = 1/20,  $R_f$  = 0.4). The product was obtained as yellow solid, Mp. 105 – 106 °C. Yield: 49% (36.8 mg);  $^1\text{H}$  NMR (400 MHz,  $\text{CDCl}_3$ )  $\delta$  7.70 – 7.65 (m, 4H), 7.55 – 7.53 (m, 2H), 7.38 – 7.33 (m, 3H), 6.27 (d,  $J$  = 3.2 Hz, 1H), 4.61 (d,  $J$  = 3.2 Hz, 1H), 2.16 (s, 6H);  $^{13}\text{C}$  NMR (100 MHz,  $\text{CDCl}_3$ )  $\delta$  140.3, 137.2, 132.4, 131.6, 131.0 (q,  $J$  = 1.3 Hz), 127.2, 126.9, 118.5, 117.7, 112.3, 73.2 (q,  $J$  = 1.4 Hz);  $^{19}\text{F}$  NMR (376 MHz,  $\text{CDCl}_3$ )  $\delta$  -75.40;

HRMS (ESI)  $m/z$   $[M+H]^+$ : Calcd for  $C_{20}H_{18}F_3N_2S$ : 375.1143. Found: 375.1141.

**4-Methyl-((4*S*,5*S*)-4-(dimethylamino)-5-phenyl-5-(trifluoromethyl)-4,5-dihydrothiophen-2-yl)benzoate (3af):**

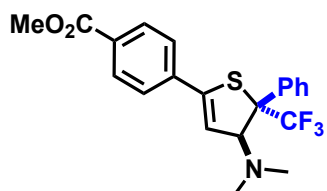

The title compound was prepared according to the general procedure (EA/PE = 1/20,  $R_f$  = 0.6). The product was obtained as yellow solid, Mp. 131 – 133 °C. Yield: 53% (42.3 mg);  $^1H$  NMR (400 MHz,  $CDCl_3$ )  $\delta$  8.07 – 8.05 (m, 2H), 7.65 – 7.56 (m, 4H), 7.55 – 7.26 (m, 3H), 6.26 (d,  $J$  = 1.2 Hz, 1H), 4.60 (d,  $J$  = 1.6 Hz, 1H), 3.94 (s, 3H), 2.15 (s, 6H);  $^{13}C$  NMR (100 MHz,  $CDCl_3$ )  $\delta$  166.5, 140.9, 137.1, 131.9, 131.1 (q,  $J$  = 1.3 Hz), 130.2, 129.9, 128.2, 126.9, 126.5, 116.4, 73.2 (q,  $J$  = 1.4 Hz), 52.3;  $^{19}F$  NMR (376 MHz,  $CDCl_3$ )  $\delta$  -75.43; HRMS (ESI)  $m/z$   $[M+H]^+$ : Calcd for  $C_{21}H_{21}F_3NO_2S$ : 408.1245. Found: 408.1250.

**(2*S*,3*S*)-*N,N*-Dimethyl-5-(4-nitrophenyl)-2-phenyl-2-(trifluoromethyl)-2,3-dihydrothiophen-3-amine (3ag):**

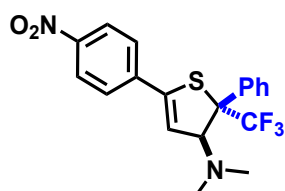

The title compound was prepared according to the general procedure (EA/PE = 1/20,  $R_f$  = 0.4). The product was obtained as yellow solid, Mp. 128 – 129 °C. Yield: 27%

(21.4 mg);  $^1\text{H}$  NMR (400 MHz,  $\text{CDCl}_3$ )  $\delta$  8.28 – 8.24 (m, 2H), 7.74 – 7.71 (m, 2H), 7.56 – 7.54 (m, 2H), 7.39 – 7.33 (m, 3H), 6.32 (d,  $J = 3.2$  Hz, 1H), 4.63 (d,  $J = 3.2$  Hz, 1H), 2.17 (s, 6H);  $^{13}\text{C}$  NMR (100 MHz,  $\text{CDCl}_3$ )  $\delta$  147.7, 139.9, 139.0, 131.6, 130.9 (q,  $J = 1.3$  Hz), 128.3, 127.3, 127.0, 123.9, 118.6, 73.4 (q,  $J = 1.3$  Hz);  $^{19}\text{F}$  NMR (376 MHz,  $\text{CDCl}_3$ )  $\delta$  -75.38; HRMS (ESI)  $m/z$   $[\text{M}+\text{H}]^+$ : Calcd for  $\text{C}_{19}\text{H}_{18}\text{F}_3\text{N}_2\text{O}_2\text{S}$ : 395.1041. Found: 395.1036.

**(2*S*,3*S*)-5-(4-Fluorophenyl)-*N,N*-dimethyl-2-phenyl-2-(trifluoromethyl)-2,3-dihydrothiophen-3-amine (3ah):**

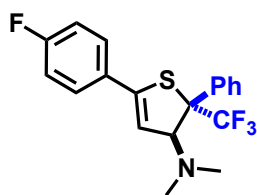

The title compound was prepared according to the general procedure (EA/PE = 1/20,  $R_f = 0.5$ ). The product was obtained as yellow solid, Mp. 97 – 99 °C. Yield: 71% (52.3 mg);  $^1\text{H}$  NMR (400 MHz,  $\text{CDCl}_3$ )  $\delta$  7.58 – 7.53 (m, 4H), 7.37 – 7.32 (m, 3H), 7.11 – 7.05 (m, 2H), 6.06 (d,  $J = 3.1$  Hz, 1H), 4.58 (d,  $J = 3.1$  Hz, 1H), 2.14 (s, 6H);  $^{13}\text{C}$  NMR (100 MHz,  $\text{CDCl}_3$ )  $\delta$  163.0 (d,  $J = 249.3$  Hz), 161.8, 140.7, 132.1, 131.1 (q,  $J = 1.3$  Hz), 129.2 (d,  $J = 3.4$  Hz), 128.4 (d,  $J = 8.2$  Hz), 128.2, 126.9, 125.4, 115.6 (d,  $J = 21.6$  Hz), 113.8, 73.3 (q,  $J = 1.4$  Hz), 70.4;  $^{19}\text{F}$  NMR (376 MHz,  $\text{CDCl}_3$ )  $\delta$  -75.32, -111.88; HRMS (ESI)  $m/z$   $[\text{M}+\text{H}]^+$ : Calcd for  $\text{C}_{19}\text{H}_{18}\text{F}_4\text{NS}$ : 368.1096. Found: 368.1100.

**(2*S*,3*S*)-5-(4-Chlorophenyl)-*N,N*-dimethyl-2-phenyl-2-(trifluoromethyl)-2,3-dihydrothiophen-3-amine (3ai):**

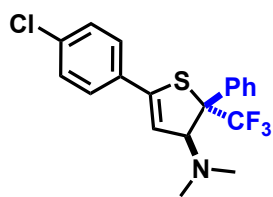

The title compound was prepared according to the general procedure (EA/PE = 1/20,  $R_f$  = 0.6). The product was obtained as yellow solid, Mp. 100 – 102 °C. Yield: 78% (59.9 mg);  $^1\text{H}$  NMR (400 MHz,  $\text{CDCl}_3$ )  $\delta$  7.57 – 7.55 (m, 2H), 7.53 – 7.50 (m, 2H), 7.39 – 7.32 (m, 5H), 6.12 (d,  $J$  = 2.8 Hz, 1H), 4.59 (d,  $J$  = 3.2 Hz, 1H), 2.14 (s, 6H);  $^{13}\text{C}$  NMR (100 MHz,  $\text{CDCl}_3$ )  $\delta$  140.7, 134.8, 131.4, 131.6 (q,  $J$  = 1.5 Hz), 128.8, 128.2, 127.8, 126.9, 114.6, 73.3 (q,  $J$  = 1.1 Hz);  $^{19}\text{F}$  NMR (376 MHz,  $\text{CDCl}_3$ )  $\delta$  -75.34; HRMS (ESI)  $m/z$   $[\text{M}+\text{H}]^+$ : Calcd for  $\text{C}_{19}\text{H}_{18}\text{ClF}_3\text{NS}$ : 384.0801. Found: 384.0797.

**(2S,3S)-5-(4-Bromophenyl)-N,N-dimethyl-2-phenyl-2-(trifluoromethyl)-2,3-dihydrothiophen-3-amine (3aj):**

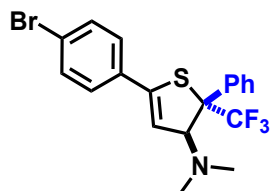

The title compound was prepared according to the general procedure (EA/PE = 1/20,  $R_f$  = 0.6). The product was obtained as yellow solid, Mp. 101 – 103 °C. Yield: 84% (71.9 mg);  $^1\text{H}$  NMR (400 MHz,  $\text{CDCl}_3$ )  $\delta$  7.57 – 7.51 (m, 4H), 7.46 – 7.43 (m, 2H), 7.38 – 7.32 (m, 3H), 6.14 (d,  $J$  = 3.2 Hz, 1H), 4.58 (d,  $J$  = 3.2 Hz, 1H), 2.14 (s, 6H);  $^{13}\text{C}$  NMR (100 MHz,  $\text{CDCl}_3$ )  $\delta$  140.8, 132.0, 131.9, 131.7, 131.1 (q,  $J$  = 1.4 Hz), 128.2, 128.1, 126.9, 122.9, 114.7, 73.3 (q,  $J$  = 1.7 Hz);  $^{19}\text{F}$  NMR (376 MHz,  $\text{CDCl}_3$ )  $\delta$  -75.32; HRMS (ESI)  $m/z$   $[\text{M}+\text{H}]^+$ : Calcd for  $\text{C}_{19}\text{H}_{18}\text{BrF}_3\text{NS}$ : 428.0295. Found: 428.0290.



**(2*S*,3*S*)-5-(4-Iodophenyl)-*N,N*-dimethyl-2-phenyl-2-(trifluoromethyl)-2,3-dihydrothiophen-3-amine (3ak):**

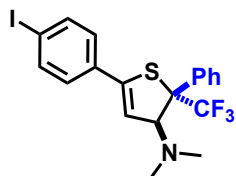

The title compound was prepared according to the general procedure (EA/PE = 1/20,  $R_f = 0.6$ ). The product was obtained as yellow solid, Mp. 101 – 103 °C. Yield: 85% (80.9 mg);  $^1\text{H}$  NMR (400 MHz,  $\text{CDCl}_3$ )  $\delta$  7.72 – 7.70 (d,  $J = 8.4$  Hz, 2H), 7.55 – 7.53 (d,  $J = 6.8$  Hz, 2H), 7.34 – 7.29 (m, 5H), 6.13 (d,  $J = 2.8$  Hz, 1H), 4.56 (d,  $J = 2.8$  Hz, 1H), 2.12 (s, 6H);  $^{13}\text{C}$  NMR (100 MHz,  $\text{CDCl}_3$ )  $\delta$  140.9, 137.7, 132.4, 131.9, 131.1 (q,  $J = 1.1$  Hz), 128.2, 128.1, 126.9, 114.8, 94.6, 73.2 (q,  $J = 1.1$  Hz);  $^{19}\text{F}$  NMR (376 MHz,  $\text{CDCl}_3$ )  $\delta$  -75.28; HRMS (ESI)  $m/z$   $[\text{M}+\text{H}]^+$ : Calcd for  $\text{C}_{19}\text{H}_{18}\text{F}_3\text{INS}$ : 476.0157. Found: 476.0158.

**(2*S*,3*S*)-*N,N*-Dimethyl-2-phenyl-5-((*E*)-styryl)-2-(trifluoromethyl)-2,3-dihydrothiophen-3-amine (3al):**

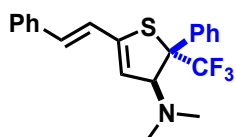

The title compound was prepared according to the general procedure (EA/PE = 1/20,  $R_f = 0.5$ ). The product was obtained as yellow solid, Mp. 121– 122 °C. Yield: 58% (43.6 mg);  $^1\text{H}$  NMR (400 MHz,  $\text{CDCl}_3$ )  $\delta$  7.62 – 7.53 (m, 2H), 7.49 – 7.43 (m, 2H), 7.39 – 7.32 (m, 5H), 7.31 – 7.26 (m, 1H), 7.02 (d,  $J = 15.9$  Hz, 1H), 6.69 (d,  $J = 15.9$

Hz, 1H), 5.90 (d,  $J = 3.2$  Hz, 1H), 4.51 (d,  $J = 3.2$  Hz, 1H), 2.10 (s, 6H);  $^{13}\text{C}$  NMR (100 MHz,  $\text{CDCl}_3$ )  $\delta$  140.8, 136.3, 133.9, 131.1 (q,  $J = 1.6$  Hz), 128.7, 128.3, 128.1, 126.9, 126.7, 121.5, 119.1, 72.6 (q,  $J = 1.2$  Hz);  $^{19}\text{F}$  NMR (376 MHz,  $\text{CDCl}_3$ )  $\delta$  -75.14; HRMS (ESI)  $m/z$   $[\text{M}+\text{H}]^+$ : Calcd for  $\text{C}_{21}\text{H}_{21}\text{F}_3\text{NS}$ : 376.1347. Found: 376.1348.

**(2*S*,3*S*)-5-(Furan-2-yl)-*N,N*-dimethyl-2-phenyl-2-(trifluoromethyl)-2,3-dihydrothiophen-3-amine (3am):**

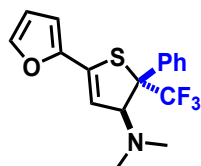

The title compound was prepared according to the general procedure (EA/PE = 1/20,  $R_f = 0.5$ ). The product was obtained as yellow solid, Mp. 62 – 64 °C. Yield: 85% (57.8mg);  $^1\text{H}$  NMR (400 MHz,  $\text{CDCl}_3$ )  $\delta$  7.62 – 7.50 (m, 2H), 7.50 – 7.45 (m, 1H), 7.40 – 7.26 (m, 3H), 6.70 – 6.38 (m, 2H), 6.15 (d,  $J = 3.2$  Hz, 1H), 4.58 (s, 1H), 2.13 (s, 6H);  $^{13}\text{C}$  NMR (100 MHz,  $\text{CDCl}_3$ )  $\delta$  143.0, 131.0 (q,  $J = 1.1$  Hz), 128.2, 126.9, 112.8, 111.6, 109.3, 99.9, 73.1 (q,  $J = 1.7$  Hz);  $^{19}\text{F}$  NMR (376 MHz,  $\text{CDCl}_3$ )  $\delta$  -75.15; HRMS (ESI)  $m/z$   $[\text{M}+\text{H}]^+$ : Calcd for  $\text{C}_{17}\text{H}_{17}\text{F}_3\text{NOS}$ : 340.0983. Found: 340.0977.

**(4*S*,5*S*)-*N,N*-Dimethyl-5-phenyl-5-(trifluoromethyl)-4,5-dihydro-[2,2'-bithiophen]-4-amine (3an):**

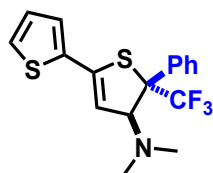

The title compound was prepared according to the general procedure (EA/PE = 1/20,

$R_f = 0.5$ ). The product was obtained as yellow solid, Mp. 84 – 86 °C. Yield: 85% (60.5 mg);  $^1\text{H}$  NMR (400 MHz,  $\text{CDCl}_3$ )  $\delta$  7.62 – 7.48 (m, 2H), 7.42 – 7.32 (m, 4H), 7.18 – 7.14 (m, 1H), 7.08– 7.00 (m, 1H), 6.03 (d,  $J = 3.2$  Hz, 1H), 4.55 (s, 1H), 2.14 (s, 6H);  $^{13}\text{C}$  NMR (100 MHz,  $\text{CDCl}_3$ )  $\delta$  135.9, 134.7, 132.0 131.1 (q,  $J = 1.4$  Hz), 128.2, 127.6, 126.9, 126.7, 125.9, 113.8, 99.9, 73.2 (q,  $J = 1.4$  Hz);  $^{19}\text{F}$  NMR (376 MHz,  $\text{CDCl}_3$ )  $\delta$  -75.15; HRMS (ESI)  $m/z$   $[\text{M}+\text{H}]^+$ : Calcd for  $\text{C}_{17}\text{H}_{17}\text{F}_3\text{NS}_2$ : 356.0755. Found: 356.0747.

**(2*S*,3*S*)-5-(Benzo[*b*]thiophen-2-yl)-*N,N*-dimethyl-2-phenyl-2-(trifluoromethyl)-2,3-dihydrothiophen-3-amine (3ao):**

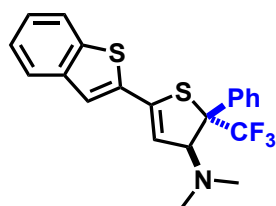

The title compound was prepared according to the general procedure (EA/PE = 1/20,  $R_f = 0.5$ ). The product was obtained as yellow solid, Mp. 97–99 °C. Yield: 73% (59.3 mg);  $^1\text{H}$  NMR (400 MHz,  $\text{CDCl}_3$ )  $\delta$  7.80–7.75 (m, 2H), 7.58–7.56 (m, 2H), 7.39–7.35 (m, 6H), 6.15 (d,  $J = 3.2$  Hz, 1H), 4.60 (d,  $J = 3.2$  Hz, 1H), 2.16 (s, 6H);  $^{13}\text{C}$  NMR (100 MHz,  $\text{CDCl}_3$ )  $\delta$  139.7, 139.3, 135.6, 135.2, 131.9, 131.0 (q,  $J = 1.6$  Hz), 128.2, 126.9, 125.4, 124.8, 124.0, 123.8, 122.1, 116.5, 73.2 (q,  $J = 1.8$  Hz);  $^{19}\text{F}$  NMR (376 MHz,  $\text{CDCl}_3$ )  $\delta$  -75.14; HRMS (ESI)  $m/z$   $[\text{M}+\text{H}]^+$ : Calcd for  $\text{C}_{21}\text{H}_{19}\text{F}_3\text{NS}_2$ : 406.0911. Found: 406.0906.

**(2*S*,3*S*)-*N,N*-Dimethyl-5-(phenanthren-2-yl)-2-phenyl-2-(trifluoromethyl)-2,3-**

**dihydrothiophen-3-amine (3ap):**

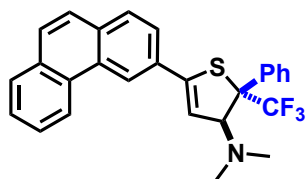

The title compound was prepared according to the general procedure (EA/PE = 1/20,  $R_f$  = 0.6). The product was obtained as yellow solid, Mp. 168 – 170 °C. Yield: 75% (67.5 mg);  $^1\text{H}$  NMR (400 MHz,  $\text{CDCl}_3$ )  $\delta$  8.82 (s, 1H), 8.78 – 8.76 (d,  $J$  = 8.4 Hz, 1H), 7.93 – 7.84 (m, 3H), 7.80 – 7.62 (m, 6H), 7.41 – 7.38 (m, 3H), 6.35 (d,  $J$  = 2.8 Hz, 1H), 4.69 (d,  $J$  = 3.2 Hz, 1H), 2.22 (s, 6H);  $^{13}\text{C}$  NMR (100 MHz,  $\text{CDCl}_3$ )  $\delta$  142.1, 132.3, 132.3, 131.2 (q,  $J$  = 1.6 Hz), 130.9, 130.2, 130.1, 128.8, 128.7, 128.1, 127.8, 127.0, 126.9, 126.8, 126.4, 124.5, 122.8, 121.3, 114.5, 114.5, 73.4 (q,  $J$  = 1.2 Hz);  $^{19}\text{F}$  NMR (376 MHz,  $\text{CDCl}_3$ )  $\delta$  -75.13; HRMS (ESI)  $m/z$   $[\text{M}+\text{H}]^+$ : Calcd for  $\text{C}_{27}\text{H}_{23}\text{F}_3\text{NS}$ : 450.1503. Found: 450.1504.

**(2S,3S)-5-((3S,5S,7S)-Adamantan-1-yl)-N,N-dimethyl-2-phenyl-2-(trifluoromethyl)-2,3-dihydrothiophen-3-amine (3aq):**

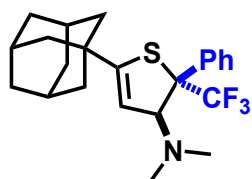

The title compound was prepared according to the general procedure (EA/PE = 1/20,  $R_f$  = 0.5). The product was obtained as yellow solid, Mp. 85 – 87 °C. Yield: 58% (47.4 mg);  $^1\text{H}$  NMR (400 MHz,  $\text{CDCl}_3$ )  $\delta$  7.55 – 7.50 (m, 2H), 7.45 – 7.26 (s, 3H), 5.38 (d,  $J$  = 2.8 Hz, 1H), 4.36 (d,  $J$  = 2.8 Hz, 1H), 2.05 – 1.70 (m, 21H);  $^{13}\text{C}$  NMR (100 MHz,

CDCl<sub>3</sub>)  $\delta$  155.2, 132.7, 131.2 (q,  $J = 1.5$  Hz), 127.8, 126.7, 108.7, 72.2 (q,  $J = 1.4$  Hz), 42.5, 36.8, 36.7, 28.4; <sup>19</sup>F NMR (376 MHz, CDCl<sub>3</sub>)  $\delta$  -75.30; HRMS (ESI)  $m/z$  [M+H]<sup>+</sup>: Calcd for C<sub>23</sub>H<sub>29</sub>F<sub>3</sub>NS: 408.1973. Found: 408.1979.

**(2S,3S)-N,N-Dimethyl-5-phenethyl-2-phenyl-2-(trifluoromethyl)-2,3-dihydrothiophen-3-amine (3ar):**

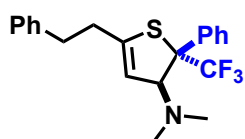

The title compound was prepared according to the general procedure (EA/PE = 1/20,  $R_f = 0.4$ ). The product was obtained as red oil. Yield: 35% (26.5 mg); <sup>1</sup>H NMR (400 MHz, CDCl<sub>3</sub>)  $\delta$  7.56 – 7.45 (m, 2H), 7.36 – 7.15 (m, 8H), 5.44 (d,  $J = 3.2$  Hz, 1H), 4.35 (d,  $J = 3.2$  Hz, 1H), 2.97 – 2.87 (m, 2H), 2.77 – 2.67 (m, 2H), 1.96 (s, 6H); <sup>13</sup>C NMR (100 MHz, CDCl<sub>3</sub>)  $\delta$  140.7, 131.1 (q,  $J = 1.4$  Hz), 128.4, 128.4, 127.9, 126.7, 126.1, 113.6, 72.8 (q,  $J = 1.1$  Hz), 34.8, 32.6; <sup>19</sup>F NMR (376 MHz, CDCl<sub>3</sub>)  $\delta$  -75.25; HRMS (ESI)  $m/z$  [M+H]<sup>+</sup>: Calcd for C<sub>21</sub>H<sub>23</sub>F<sub>3</sub>NS: 378.1503. Found: 378.1497.

**1-((2S,3S)-2,5-Diphenyl-2-(trifluoromethyl)-2,3-dihydrothiophen-3-yl)pyrrolidine (3as):**

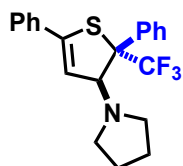

The title compound was prepared according to the general procedure (EA/PE = 1/20,  $R_f = 0.4$ ). The product was obtained as yellow oil. Yield: 70% (52.7 mg); <sup>1</sup>H NMR (400

MHz, CDCl<sub>3</sub>)  $\delta$  7.60 – 7.50 (m, 4H), 7.42 – 7.27 (m, 6H), 6.10 (d,  $J$  = 3.2 Hz, 1H), 4.90 (d,  $J$  = 3.2 Hz, 1H), 2.65 – 2.64 (m, 2H), 2.37 – 2.34 (m, 2H), 1.54 – 1.37 (m, 4H); <sup>13</sup>C NMR (100 MHz, CDCl<sub>3</sub>)  $\delta$  141.6, 133.0, 132.6, 130.9 (q,  $J$  = 1.4 Hz), 128.9, 128.6, 128.0, 126.6, 126.5, 113.9, 69.1 (q,  $J$  = 1.2 Hz), 24.0; <sup>19</sup>F NMR (376 MHz, CDCl<sub>3</sub>)  $\delta$  -74.90; HRMS (ESI)  $m/z$  [M+H]<sup>+</sup>: Calcd for C<sub>21</sub>H<sub>20</sub>F<sub>3</sub>NS: 376.1347. Found: 376.1350.

**(2*S*,3*S*)-2-(4-(Tert-butyl)phenyl)-*N,N*-dimethyl-5-phenyl-2-(trifluoromethyl)-2,3-dihydrothiophen-3-amine(3ba):**

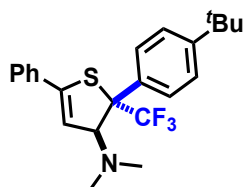

The title compound was prepared according to the general procedure (EA/PE = 1/20, R<sub>f</sub> = 0.6). The product was obtained as yellow solid, Mp. 92 – 93 °C. Yield: 96% (77.9 mg); <sup>1</sup>H NMR (400 MHz, CDCl<sub>3</sub>)  $\delta$  7.62 – 7.55 (m, 2H), 7.53 – 7.45 (m, 2H), 7.44 – 7.30 (m, 5H), 6.14 (d,  $J$  = 3.0 Hz, 1H), 4.58 (d,  $J$  = 2.5 Hz, 1H), 2.15 (s, 6H), 1.34 (s, 9H); <sup>13</sup>C NMR (100 MHz, CDCl<sub>3</sub>)  $\delta$  150.8, 133.0 130.6 (q,  $J$  = 1.6 Hz), 128.9, 128.6, 126.6, 123.8, 114.0, 112.9, 105.1, 73.2 (q,  $J$  = 1.1 Hz), 34.5, 31.3; <sup>19</sup>F NMR (376 MHz, CDCl<sub>3</sub>)  $\delta$  -75.33; HRMS (ESI)  $m/z$  [M+H]<sup>+</sup>: Calcd for C<sub>23</sub>H<sub>27</sub>F<sub>3</sub>NS: 406.1816. Found: 406.1809.

**(2*S*,3*S*)-2-(4-Methoxyphenyl)-*N,N*-dimethyl-5-phenyl-2-(trifluoromethyl)-2,3-dihydrothiophen-3-amine (3ca):**

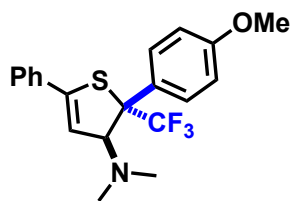

The title compound was prepared according to the general procedure (EA/PE = 1/20,  $R_f$  = 0.4). The product was obtained as yellow solid, Mp. 88 – 90 °C. Yield: 74% (56.3 mg);  $^1\text{H}$  NMR (400 MHz,  $\text{CDCl}_3$ )  $\delta$  7.60 – 7.55 (m, 2H), 7.54 – 7.49 (m, 2H), 7.37 – 7.30 (m, 3H), 6.94 – 6.89 (m, 2H), 6.01 (d,  $J$  = 3.2 Hz, 1H), 4.56 (d,  $J$  = 3.2 Hz, 1H), 3.84 (s, 3H), 2.13 (s, 6H);  $^{13}\text{C}$  NMR (100 MHz,  $\text{CDCl}_3$ )  $\delta$  160.2, 141.3, 132.3, 131.1 (q,  $J$  = 1.6 Hz), 128.0, 127.9, 126.8, 125.6, 113.9, 111.9, 73.3 (q,  $J$  = 1.6 Hz), 55.4;  $^{19}\text{F}$  NMR (376 MHz,  $\text{CDCl}_3$ )  $\delta$  -75.60; HRMS (ESI)  $m/z$   $[\text{M}+\text{H}]^+$ : Calcd for  $\text{C}_{20}\text{H}_{21}\text{F}_3\text{NOS}$ : 380.1296. Found: 380.1292.

**(2S,3S)-N,N-Dimethyl-2-(3-phenoxyphenyl)-5-phenyl-2-(trifluoromethyl)-2,3-dihydrothiophen-3-amine (3da):**

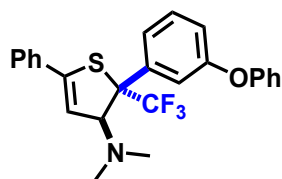

The title compound was prepared according to the general procedure (EA/PE = 1/20,  $R_f$  = 0.6). The product was obtained as yellow oil. Yield: 85% (75.2 mg);  $^1\text{H}$  NMR (400 MHz,  $\text{CDCl}_3$ )  $\delta$  7.58 – 7.54 (m, 2H), 7.41 – 7.28 (m, 8H), 7.10 – 6.96 (m, 4H), 6.10 (d,  $J$  = 3.2 Hz, 1H), 4.50 (d,  $J$  = 3.2 Hz, 1H), 2.14 (s, 6H);  $^{13}\text{C}$  NMR (100 MHz,  $\text{CDCl}_3$ )  $\delta$  157.5, 155.1, 141.8, 134.0 (q,  $J$  = 1.0 Hz), 132.8, 129.6, 129.0, 128.6, 128.2, 126.6, 126.2, 123.0, 122.9, 119.3, 118.1, 113.7, 73.3 (q,  $J$  = 1.5 Hz);  $^{19}\text{F}$  NMR (376 MHz,  $\text{CDCl}_3$ )  $\delta$

-75.16; HRMS (ESI)  $m/z$   $[M+H]^+$ : Calcd for  $C_{25}H_{23}F_3NOS$ : 442.1452. Found: 442.1447.

**4-((2*S*,3*S*)-3-(Dimethylamino)-5-phenyl-2-(trifluoromethyl)-2,3-dihydrothiophen-2-yl)benzonitrile (3ea):**

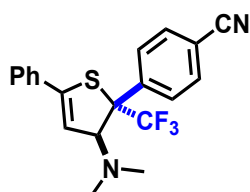

The title compound was prepared according to the general procedure (EA/PE = 1/20,  $R_f$  = 0.6). The product was obtained as yellow solid, Mp. 103 – 105 °C. Yield: 28% (21.0 mg);  $^1H$  NMR (400 MHz,  $CDCl_3$ )  $\delta$  7.72 – 7.64 (m, 4H), 7.58 – 7.55 (m, 2H), 7.44 – 7.38 (m, 3H), 6.13 (d,  $J$  = 2.8 Hz, 1H), 4.61 (s, 1H), 2.13 (s, 6H);  $^{13}C$  NMR (100 MHz,  $CDCl_3$ )  $\delta$  141.6, 137.6, 132.5, 132.0 (q,  $J$  = 1.3 Hz), 130.5, 129.2, 128.7, 126.6, 118.6, 113.5, 112.1, 73.6 (q,  $J$  = 1.2 Hz);  $^{19}F$  NMR (376 MHz,  $CDCl_3$ )  $\delta$  -74.88; HRMS (ESI)  $m/z$   $[M+H]^+$ : Calcd for  $C_{20}H_{18}F_3N_2S$ : 375.1143. Found: 375.1138.

**(2*S*,3*S*)-2-(4-Bromophenyl)-*N,N*-dimethyl-5-phenyl-2-(trifluoromethyl)-2,3-dihydrothiophen-3-amine (3fa):**

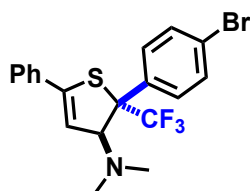

The title compound was prepared according to the general procedure (EA/PE = 1/20,  $R_f$  = 0.6). The product was obtained as yellow oil. Yield: 83% (71.1 mg);  $^1H$  NMR (400



MHz, CDCl<sub>3</sub>)  $\delta$  7.60 – 7.55 (m, 2H), 7.51 – 7.44 (m, 4H), 7.43 – 7.36 (m, 3H), 6.13 (d,  $J = 3.2$  Hz, 1H), 4.55 (d,  $J = 3.2$  Hz, 1H), 2.14 (s, 6H); <sup>13</sup>C NMR (100 MHz, CDCl<sub>3</sub>)  $\delta$  141.8, 132.8 (q,  $J = 1.5$  Hz), 132.7, 131.3, 130.0, 129.1, 128.6, 126.6, 122.7, 113.7, 73.3 (q,  $J = 1.5$  Hz); <sup>19</sup>F NMR (376 MHz, CDCl<sub>3</sub>)  $\delta$  -75.34; HRMS (ESI)  $m/z$  [M+H]<sup>+</sup>: Calcd for C<sub>19</sub>H<sub>18</sub>BrF<sub>3</sub>NS: 428.0295. Found: 428.0286.

**(2*S*,3*S*)-*N,N*-dimethyl-2-(naphthalen-2-yl)-5-phenyl-2-(trifluoromethyl)-2,3-dihydrothiophen-3-amine (3ga)**

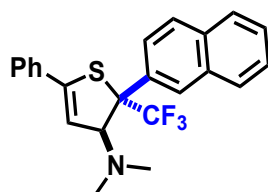

The title compound was prepared according to the general procedure (EA/PE = 1/20, R<sub>f</sub> = 0.6). The product was obtained as yellow solid, Mp. 122 – 123 °C. Yield: 92% (73.6 mg); <sup>1</sup>H NMR (400 MHz, CDCl<sub>3</sub>)  $\delta$  8.07 – 8.06 (m, 1H), 7.92 – 7.83 (m, 2H), 7.81 – 7.77 (m, 1H), 7.72 – 7.66 (m, 1H), 7.64 – 7.60 (m, 2H), 7.56 – 7.48 (m, 2H), 7.46 – 7.34 (m, 3H), 6.19 (d,  $J = 3.2$  Hz, 1H), 4.69 (d,  $J = 3.2$  Hz, 1H), 2.16 (s, 6H); <sup>13</sup>C NMR (100 MHz, CDCl<sub>3</sub>)  $\delta$  141.9, 132.9, 132.7, 132.3, 130.4 (q,  $J = 1.1$  Hz), 132.2, 129.0, 128.9, 128.9, 128.8, 128.6, 128.3, 127.3, 126.6, 126.6, 125.8, 125.5, 113.9, 73.3 (q,  $J = 1.3$  Hz); <sup>19</sup>F NMR (376 MHz, CDCl<sub>3</sub>)  $\delta$  -74.83; HRMS (ESI)  $m/z$  [M+H]<sup>+</sup>: Calcd for C<sub>23</sub>H<sub>21</sub>F<sub>3</sub>NS: 400.1347. Found: 400.1342.

**(2*S*,3*S*)-2-(9*H*-Fluoren-2-yl)-*N,N*-dimethyl-5-phenyl-2-(trifluoromethyl)-2,3-dihydrothiophen-3-amine (3ha):**

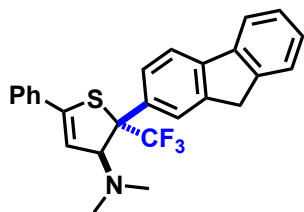

The title compound was prepared according to the general procedure (EA/PE = 1/20,  $R_f = 0.6$ ). The product was obtained as yellow solid, Mp. 165 – 166 °C. Yield: 45% (39.4 mg);  $^1\text{H}$  NMR (400 MHz,  $\text{CDCl}_3$ )  $\delta$  7.79 (d,  $J=7.5$  Hz, 1H), 7.77 – 7.73 (m, 2H), 7.64 – 7.58 (m, 3H), 7.57 – 7.53 (m, 1H), 7.44 – 7.34 (m, 4H), 7.34 – 7.28 (m, 1H), 6.15 (d,  $J=3.2$  Hz, 1H), 4.63 (d,  $J=3.2$  Hz, 1H), 3.94 (s, 2H), 2.16 (s, 6H);  $^{13}\text{C}$  NMR (100 MHz,  $\text{CDCl}_3$ )  $\delta$  143.7, 141.9, 141.7, 141.5, 141.2, 133.0, 130.6, 129.9 (q,  $J=1.5$  Hz), 128.9, 128.6, 127.7, 126.9, 126.8, 126.6, 125.0, 120.1, 118.1, 114.0, 73.4 (q,  $J=1.3$  Hz), 37.0;  $^{19}\text{F}$  NMR (376 MHz,  $\text{CDCl}_3$ )  $\delta$  -75.07; HRMS (ESI)  $m/z$   $[\text{M}+\text{H}]^+$ : Calcd for  $\text{C}_{26}\text{H}_{23}\text{F}_3\text{NS}$ : 438.1503. Found: 438.1495.

**(2*S*,3*S*)-*N,N*-Dimethyl-5-phenyl-2-(trifluoromethyl)-2,3-dihydro-[2,3'-bithiophen]-3-amine (3ia)**

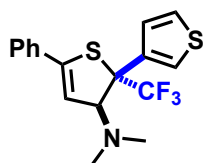

The title compound was prepared according to the general procedure (EA/PE = 1/20,  $R_f = 0.6$ ). The product was obtained as yellow solid, Mp. 74 – 76 °C. Yield: 65% (46.3 mg);  $^1\text{H}$  NMR (400 MHz,  $\text{CDCl}_3$ )  $\delta$  7.60 – 7.51 (m, 3H), 7.45 – 7.33 (m, 3H), 7.31 – 7.26 (m, 2H), 6.09 (s, 1H), 4.58 (s, 1H), 2.18 (s, 6H);  $^{13}\text{C}$  NMR (100 MHz,  $\text{CDCl}_3$ )  $\delta$  141.5, 132.9, 130.0, 129.0, 128.6, 126.6, 123.6, 114.1, 99.9, 74.5 (q,  $J=1.6$  Hz);  $^{19}\text{F}$

NMR (376 MHz, CDCl<sub>3</sub>)  $\delta$  -75.42; HRMS (ESI)  $m/z$  [M+H]<sup>+</sup>: Calcd for C<sub>17</sub>H<sub>17</sub>F<sub>3</sub>NS<sub>2</sub>: 356.0755. Found: 356.0748.

### 3.4 Derivative products and their spectral data

#### Large-scale reaction of **3aa**:

A mixture of **1a** (10.0 mmol, 1.0 equiv.), **2a** (24.0 mmol, 2.4 equiv.), Rh<sub>2</sub>(esp)<sub>2</sub> (0.1 mmol, 1 mol%), Cs<sub>2</sub>CO<sub>3</sub> (25.0 mmol, 2.5 equiv.) and acetonitrile (50 mL) was sealed in a Schlenk tube under Argon protection at 90 °C and the mixture was stirred until the **1a** was consumed completely. Then the reaction mixture was filtered by diatomite and concentrated under reduced pressure and purified by column chromatography (EA/PE = 1:20) to give the desired product **3aa** (2.86g, 82%).

#### Large-scale reaction of **5a**:

A mixture of enaminothione **1a** (10.0 mmol, 1.0 equiv.), **4** (BrCF<sub>2</sub>COOEt, 20.0 mmol, 2.0 equiv.), <sup>n</sup>Pr<sub>3</sub>N (30.0 mmol, 3.0 equiv.), anhydrous THF (100 mL) was sealed in a Schlenk tube under nitrogen protection at 80 °C and the mixture was stirred until the enaminothione **1a** was consumed completely. The crude product was filtered through a short pad of Celite, and the filtrate was concentrated under vacuum and purified by flash chromatography (eluent: 20% v/v ethyl acetate in petroleum ether) to afford products **5a** (1.93g, 80%).

### 3-Methoxy-2,5-diphenyl-2-(trifluoromethyl)-2,3-dihydrothiophene (4)<sup>3</sup>:

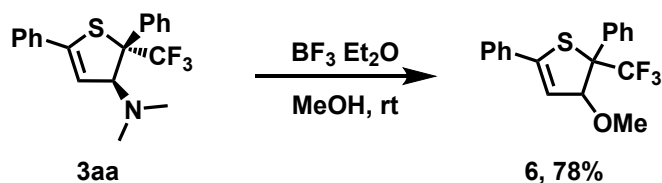

A flame-dried round-bottomed flask was charged with **3aa** (0.2 mmol, 1.0 equiv.) and MeOH (2 mL), then cooled to 0 °C. BF<sub>3</sub>·Et<sub>2</sub>O (0.2 mmol, 1.0 equiv.) was added dropwise and the mixture was stirred at room temperature until the **3aa** was consumed completely. The layers were separated and the aqueous layer was extracted with DCM (2 × 5 mL). The combined organic layers were washed with brine (10 mL), then dried (Na<sub>2</sub>SO<sub>4</sub>). After removal of the solvent, the residue was subjected to column chromatography (PE:EtOAc = 19:1) to give **6** (52.3 mg, 78% yield) as yellow oil. <sup>1</sup>H NMR (400 MHz, CDCl<sub>3</sub>) δ 7.63 – 7.56 (m, 4H), 7.45 – 7.35 (m, 6H), 6.12 (d, *J* = 3.2 Hz, 1H), 5.26 (d, *J* = 3.2 Hz, 1H), 3.00 (s, 3H); <sup>13</sup>C NMR (100 MHz, CDCl<sub>3</sub>) δ 132.5, 130.3 (q, *J* = 1.5 Hz), 129.5, 128.7, 128.6, 128.4, 128.2, 127.6, 126.8, 115.0, 99.9, 85.8, 54.0; HRMS (ESI) *m/z* [M+H]<sup>+</sup>: Calcd for C<sub>18</sub>H<sub>16</sub>F<sub>3</sub>OS: 337.0874. Found: 337.0860.

### *N*-(2,5-diphenyl-2-(trifluoromethyl)-2,3-dihydrothiophen-3-yl)-*N*-methylnitrous amide & *N*-(2,5-diphenyl-2-(trifluoromethyl)-2,3-dihydrothiophen-3-yl)-*N*-methylnitramide (**5**)<sup>4</sup>:

<sup>3</sup> M. Ikeda, T. Matsuzawa, T. Morita, T. Hosoya and S. Yoshida, *Chem. Eur. J.*, 2020, **26**, 12333–12337.

<sup>4</sup> X. Jia, P. Li, Y. Shao, Y. Yuan, H. Ji, W. Hou, X. Liu and X. Zhang, *Green Chem.*, 2017, **19**, 5568–5574.

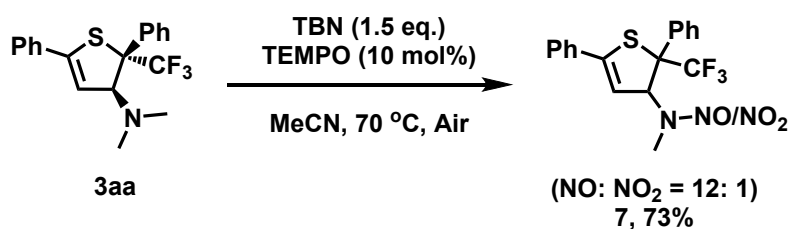

A tube was charged with 2*H*-thiophen **3aa** (0.4 mmol, 1.0 equiv.), TBN (0.6 mmol, 1.5 equiv.), TEMPO (0.04 mmol, 10 mol%), CH<sub>3</sub>CN (5 mL) was added subsequently and the reaction mixture was stirred at 70 °C until the starting material was fully consumed (24 h). The product was obtained as brown oil. Yield: 73% (106.2 mg); <sup>1</sup>H NMR (400 MHz, CDCl<sub>3</sub>) δ 7.65 – 7.55 (m, 2H), 7.49– 7.40 (m, 5H), 7.37 – 7.29 (m, 3H), 7.19 (d, *J* = 3.6 Hz, 0.07H) & 6.88 (d, *J* = 3.6 Hz, 0.93H), 6.06 (d, *J* = 3.6 Hz, 0.93H) & 5.67 (d, *J* = 3.6 Hz, 0.07H), 3.25 (s, 0.21H) & 2.39 (s, 2.79H); <sup>13</sup>C NMR (100 MHz, CDCl<sub>3</sub>) δ 146.3, 131.5, 130.1, 130.0 (q, *J* = 1.3 Hz), 129.1, 128.8, 128.1, 126.8, 72.3, 28.6; <sup>19</sup>F NMR (376 MHz, CDCl<sub>3</sub>) δ -74.74, 75.28; HRMS (ESI) *m/z* [M+H]<sup>+</sup>: Calcd for C<sub>18</sub>H<sub>16</sub>F<sub>2</sub>N<sub>2</sub>OS: 365.0935. Found: 365.0930. Calcd for C<sub>18</sub>H<sub>16</sub>F<sub>3</sub>N<sub>2</sub>O<sub>2</sub>S: 381.0885. Found: 381.0877.

#### 4-Bromo-2,5-diphenyl-2-(trifluoromethyl)-2,3-dihydrothiophen-3-yl acetate (**6**)<sup>5</sup>:

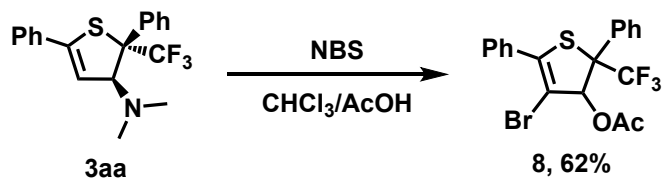

2*H*-thiophen **3aa** (0.2 mmol, 1.0 equiv.) and NBS (0.24 mmol, 1.2equiv.) were dissolved into CH<sub>3</sub>COOH (4 mL) stirred at 55 °C for 12 h. After reaction, saturated

<sup>5</sup> M. Shi, Y. He, Y. Sun, D. Fang, J. Miao, M. U. Ali, T. Wang, Y. Wang, T. Zhang and H. Meng, *Org. Elect.*, 2020, **84**, 105793–105803.

sodium bicarbonate (5 mL) was added to react with excess CH<sub>3</sub>COOH and then retracted with DCM. The organic phase was dried, evaporated, was purified by column chromatography to give the product was obtained as a yellow oil (54.8 mg, 62%). <sup>1</sup>H NMR (400 MHz, CDCl<sub>3</sub>) δ 7.70 – 7.64 (m, 2H), 7.60 – 7.52 (m, 2H), 7.46 – 7.39 (m, 6H), 4.57 (s, 1H), 2.01 (s, 3H); <sup>13</sup>C NMR (100 MHz, CDCl<sub>3</sub>) δ 135.5, 133.0, 132.1, 131.6, 129.9, 129.5, 128.7, 128.7, 128.5, 127.9, 104.3, 73,4, 29.6; <sup>19</sup>F NMR (376 MHz, CDCl<sub>3</sub>) δ -74.47; HRMS (ESI) m/z [M+H]<sup>+</sup>: Calcd for C<sub>19</sub>H<sub>15</sub>BrF<sub>3</sub>O<sub>2</sub>S: 442.9928. Found: 442.9916.

#### 4. NMR Spectra

##### 4.1 NMR spectra for enaminothiones

<sup>1</sup>H NMR spectra of **1a**

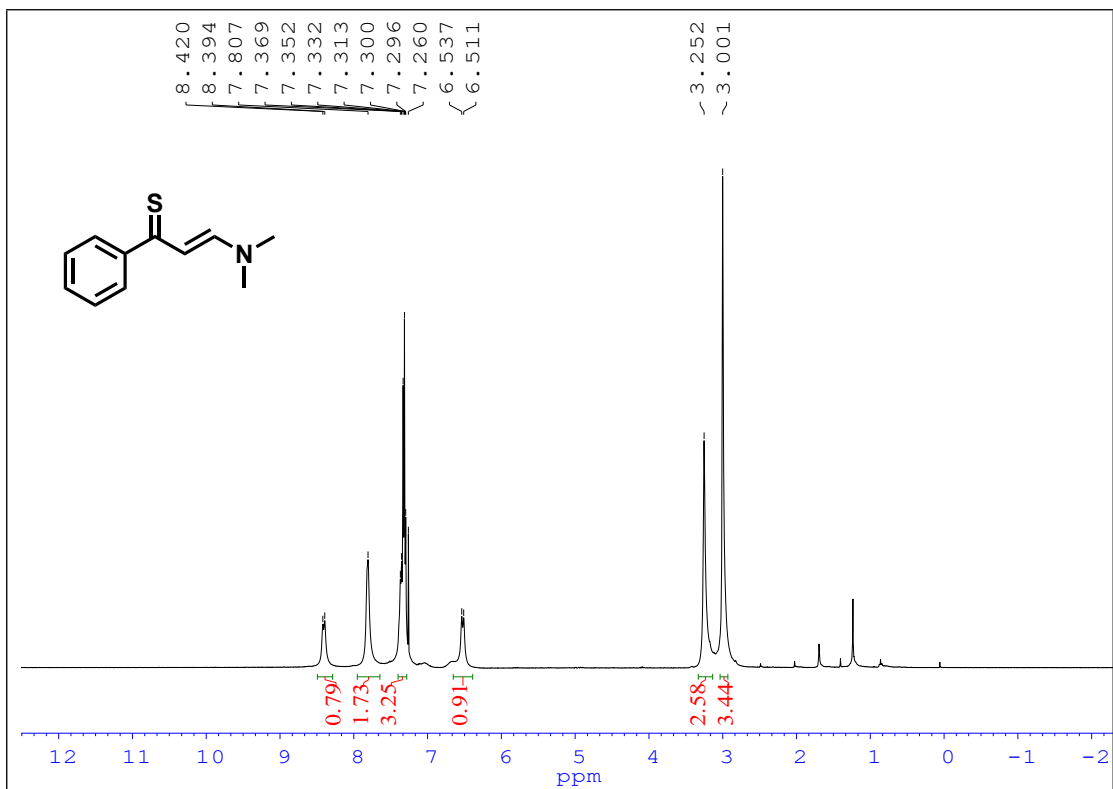

**<sup>13</sup>C NMR spectra of 1a**

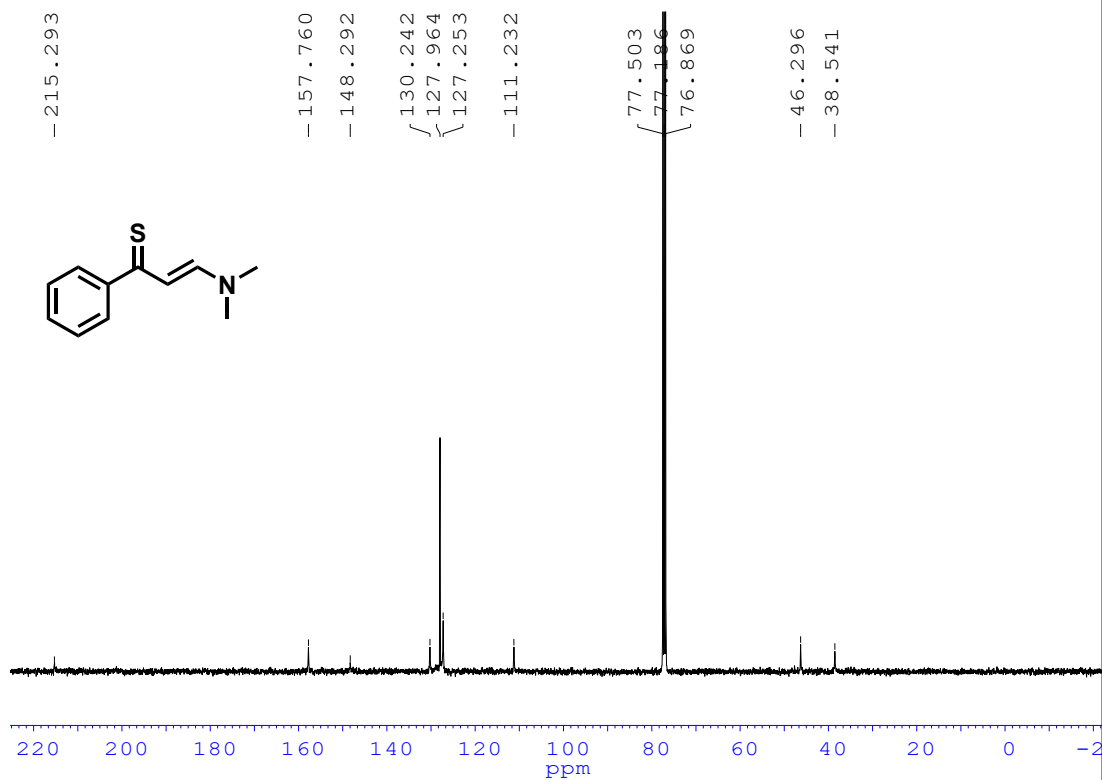

**<sup>1</sup>H NMR spectra of 1b**

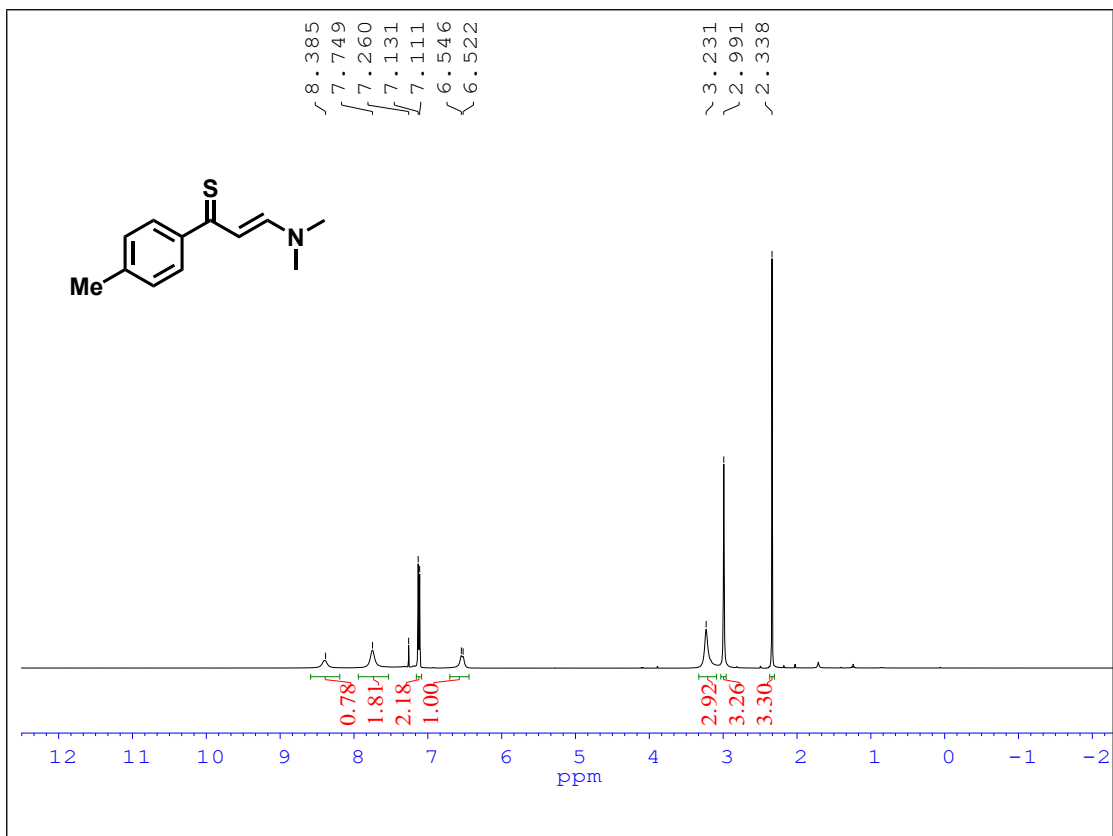

**<sup>13</sup>C NMR spectra of 1b**

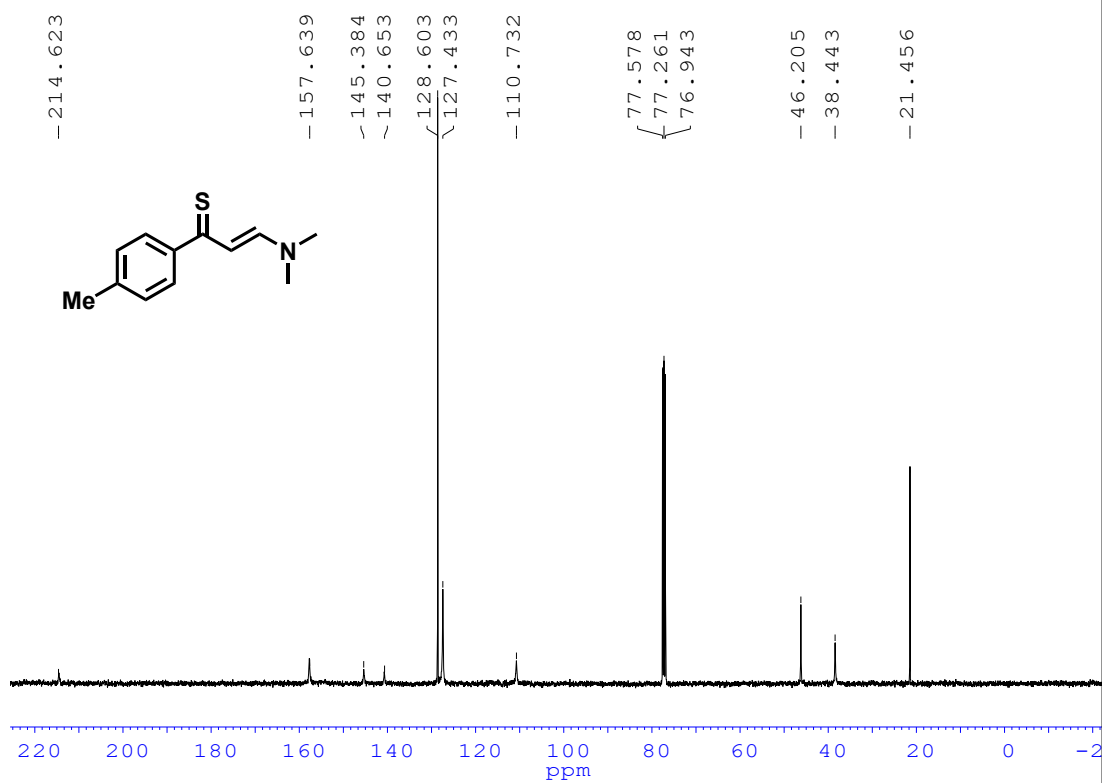

**<sup>1</sup>H NMR spectra of 1c**



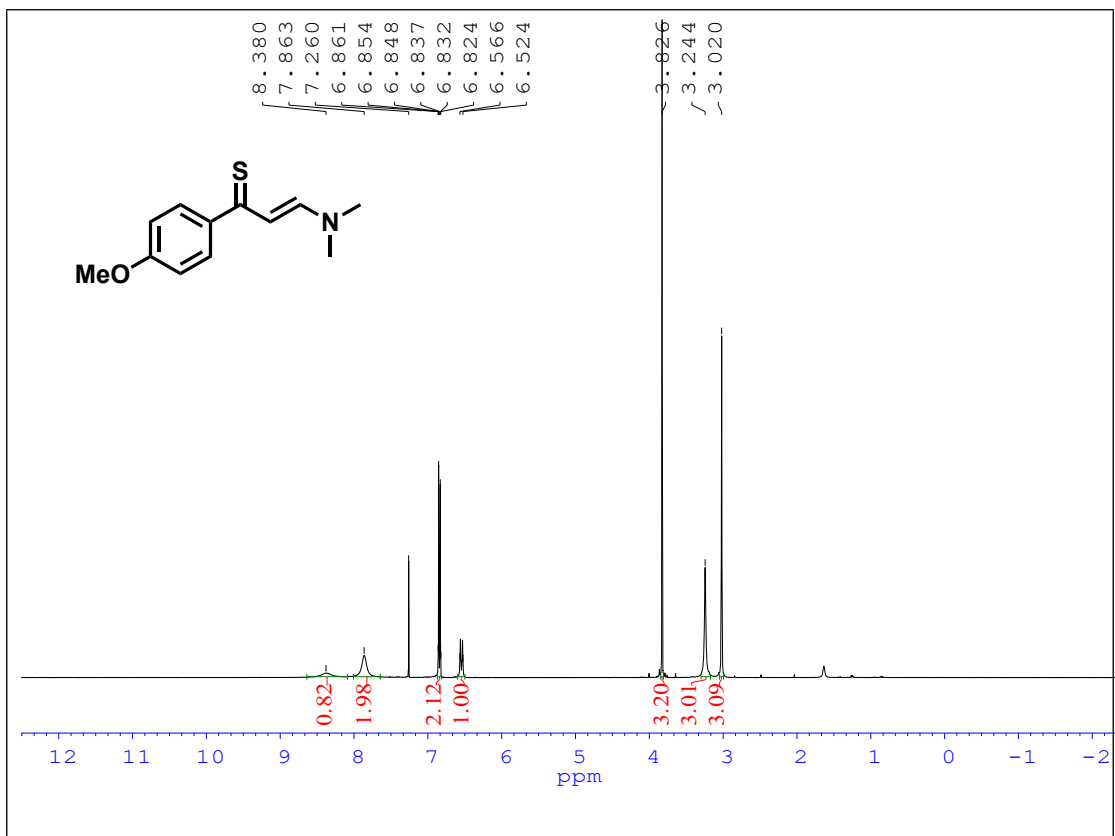

**<sup>13</sup>C NMR spectra of 1c**

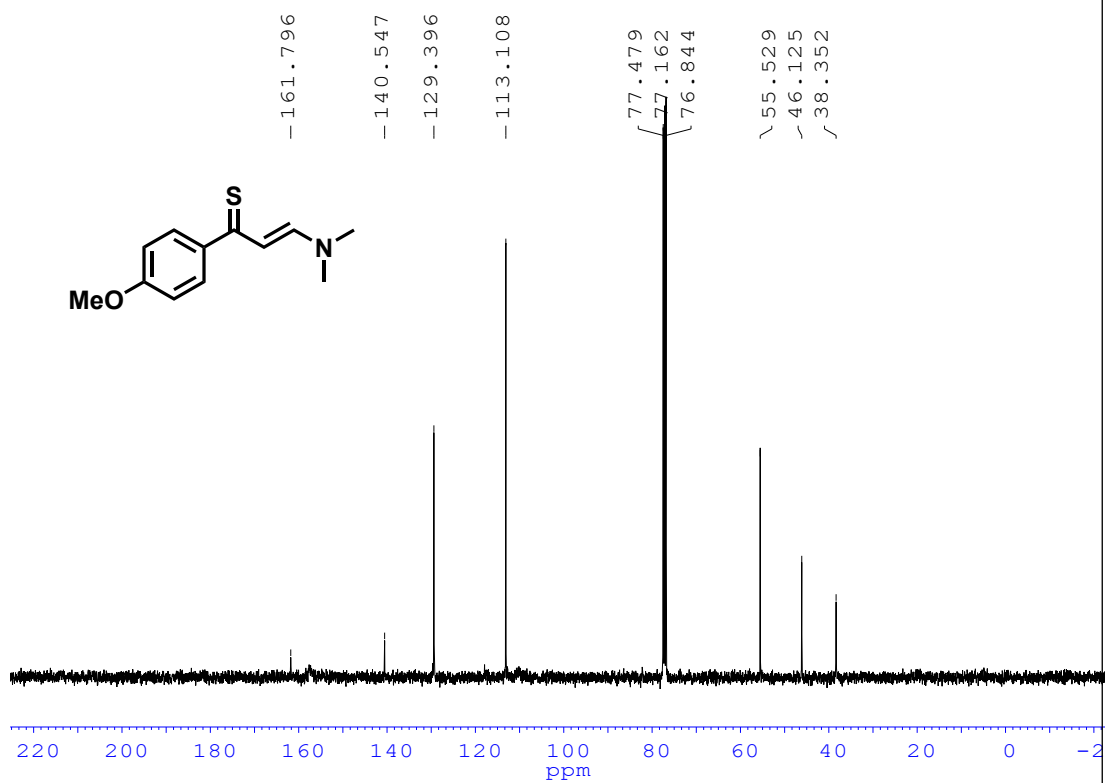

**<sup>1</sup>H NMR spectra of 1d**

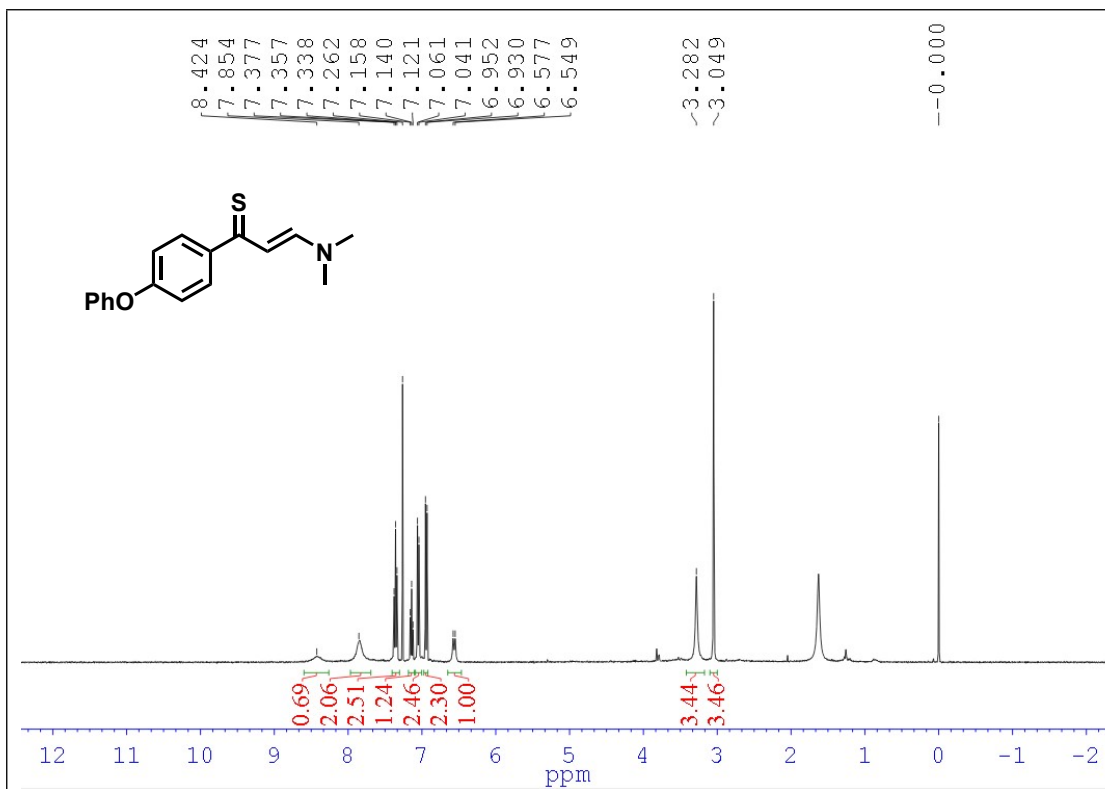

**<sup>13</sup>C NMR spectra of 1d**

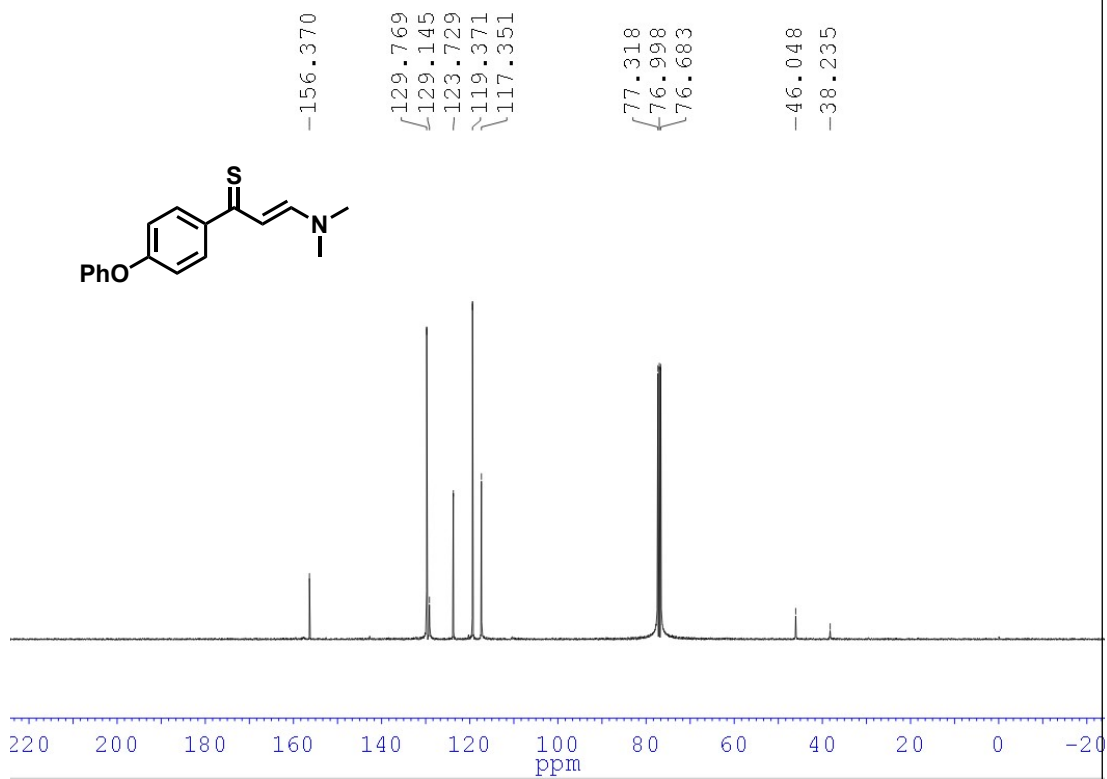

**<sup>1</sup>H NMR spectra of 1e**

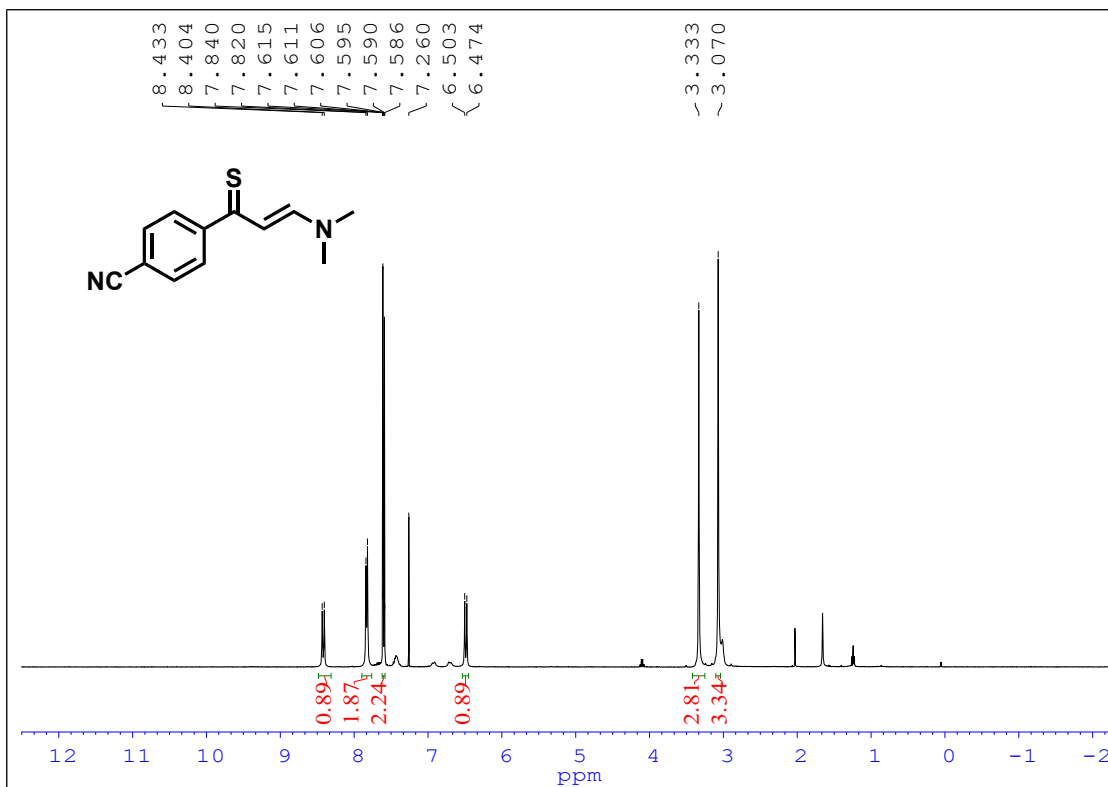

**<sup>13</sup>C NMR spectra of 1e**

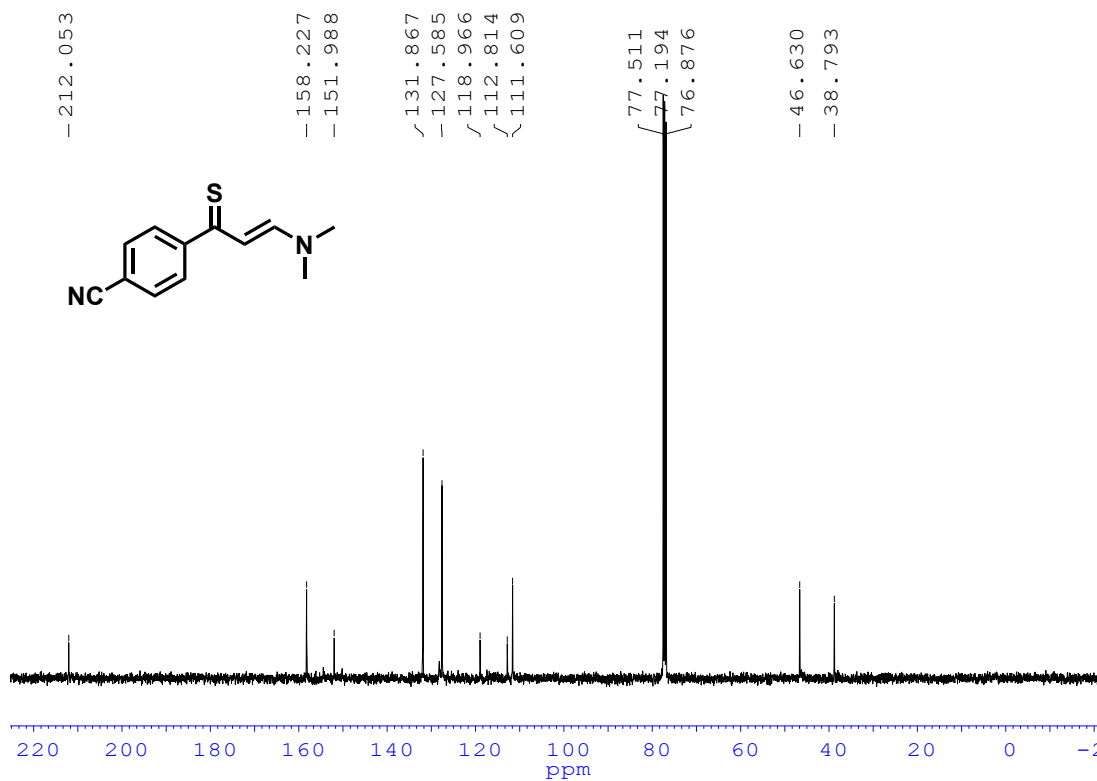

**<sup>1</sup>H NMR spectra of 1f**

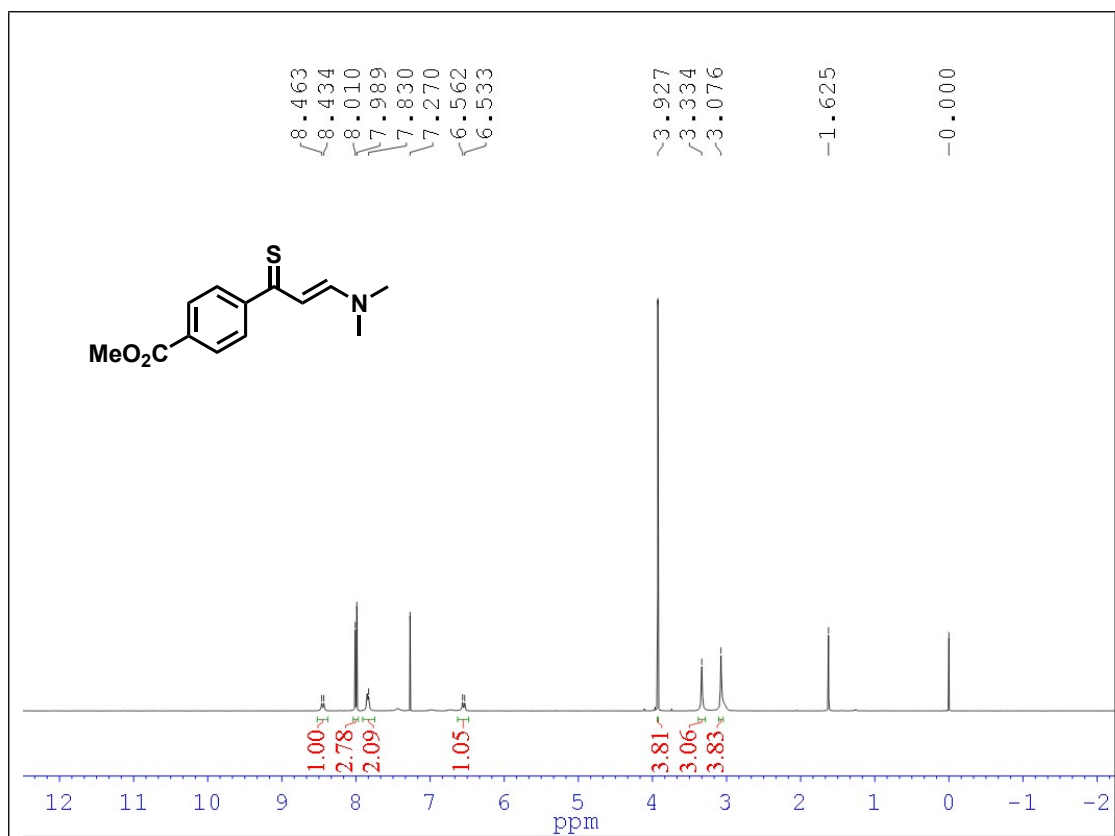

**<sup>13</sup>C NMR spectra of 1f**

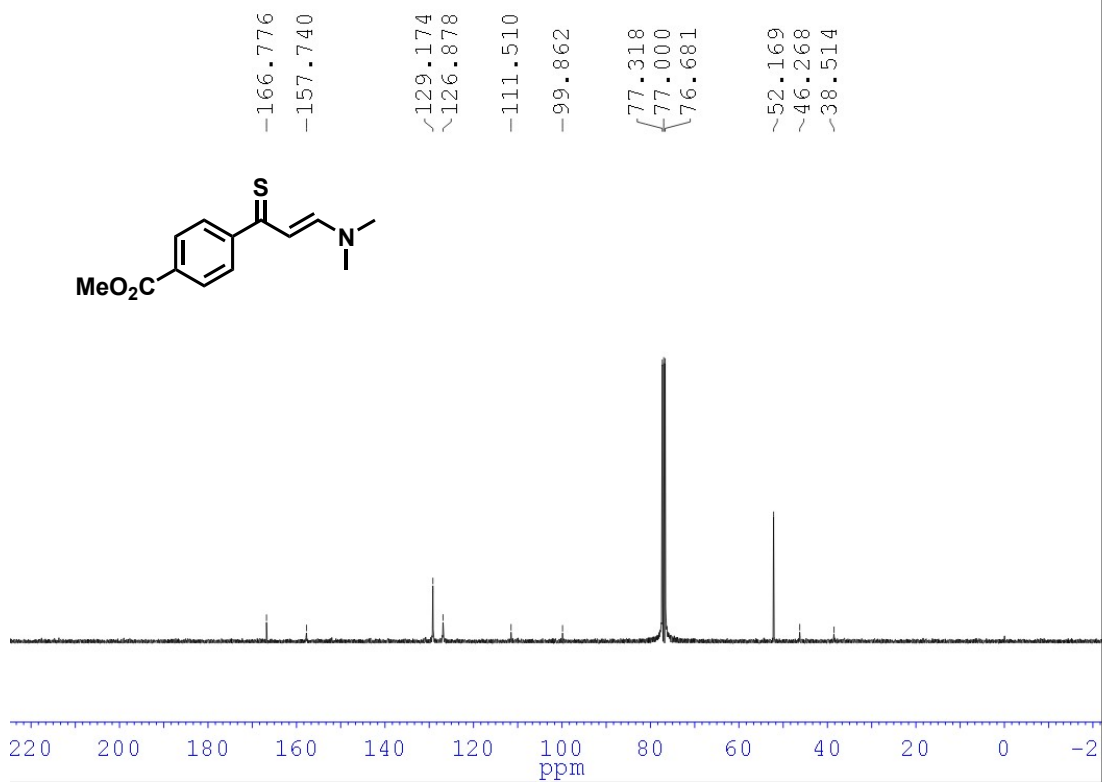

**<sup>1</sup>H NMR spectra of 1g**

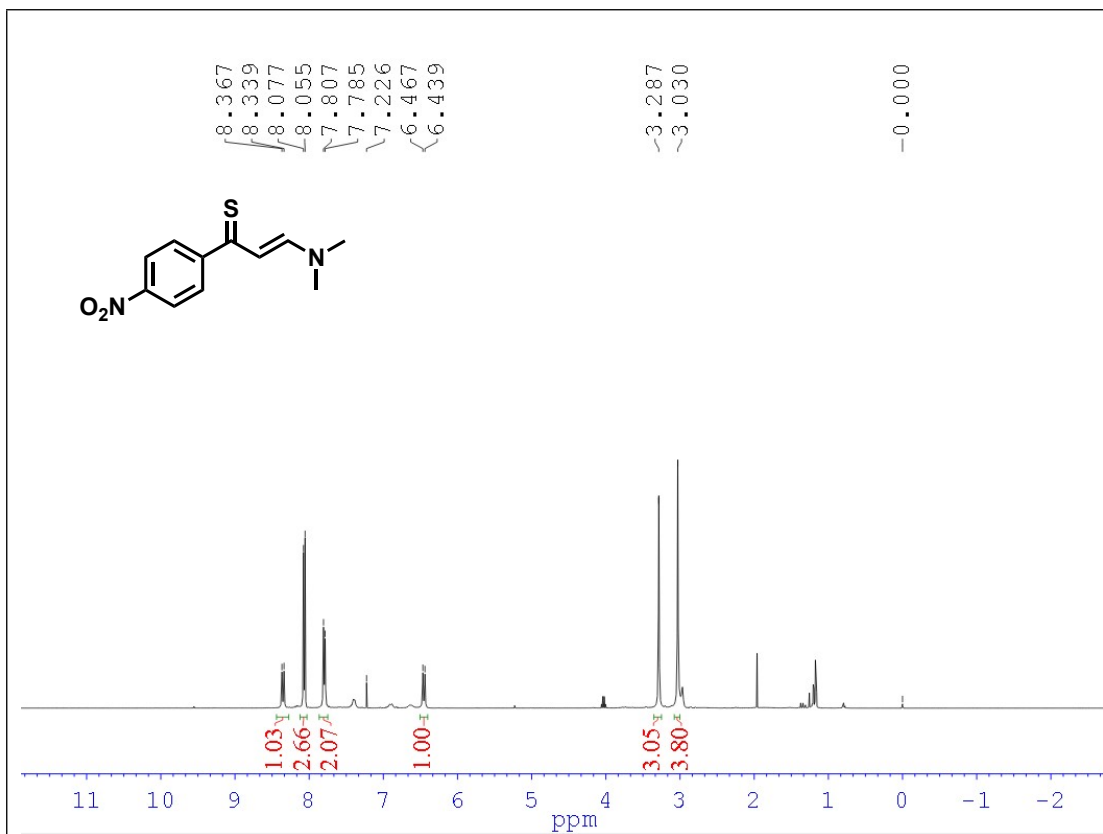

**<sup>13</sup>C NMR spectra of 1g**

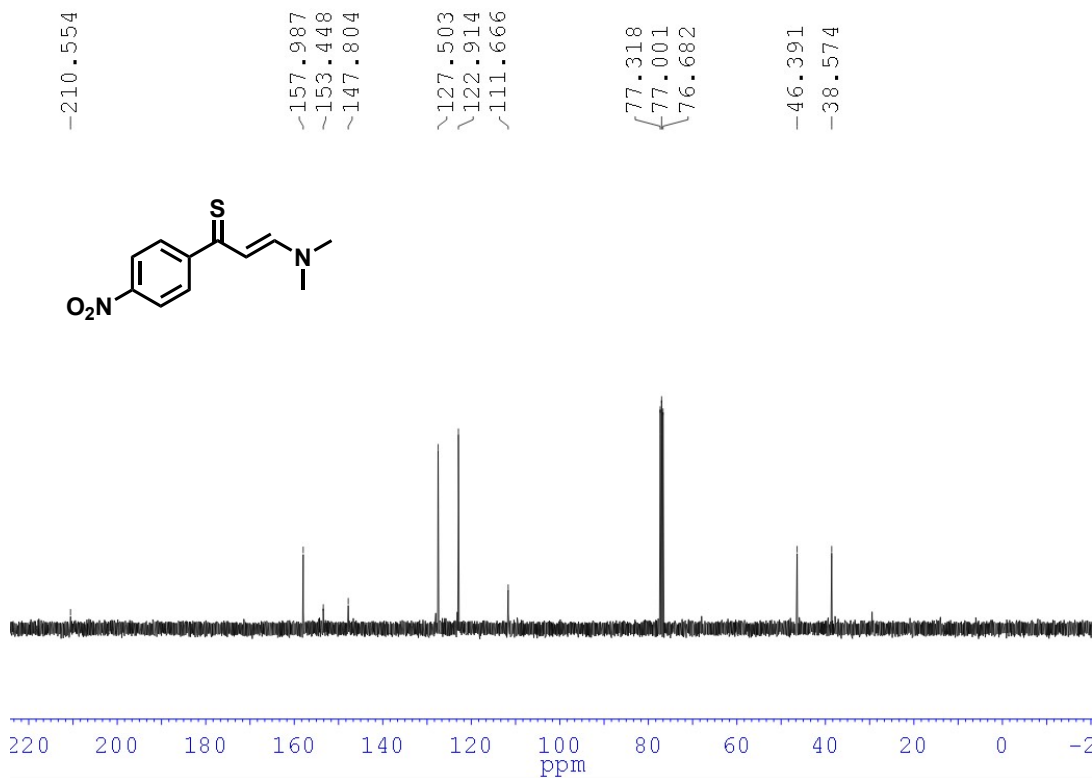

**<sup>1</sup>H NMR spectra of 1h**

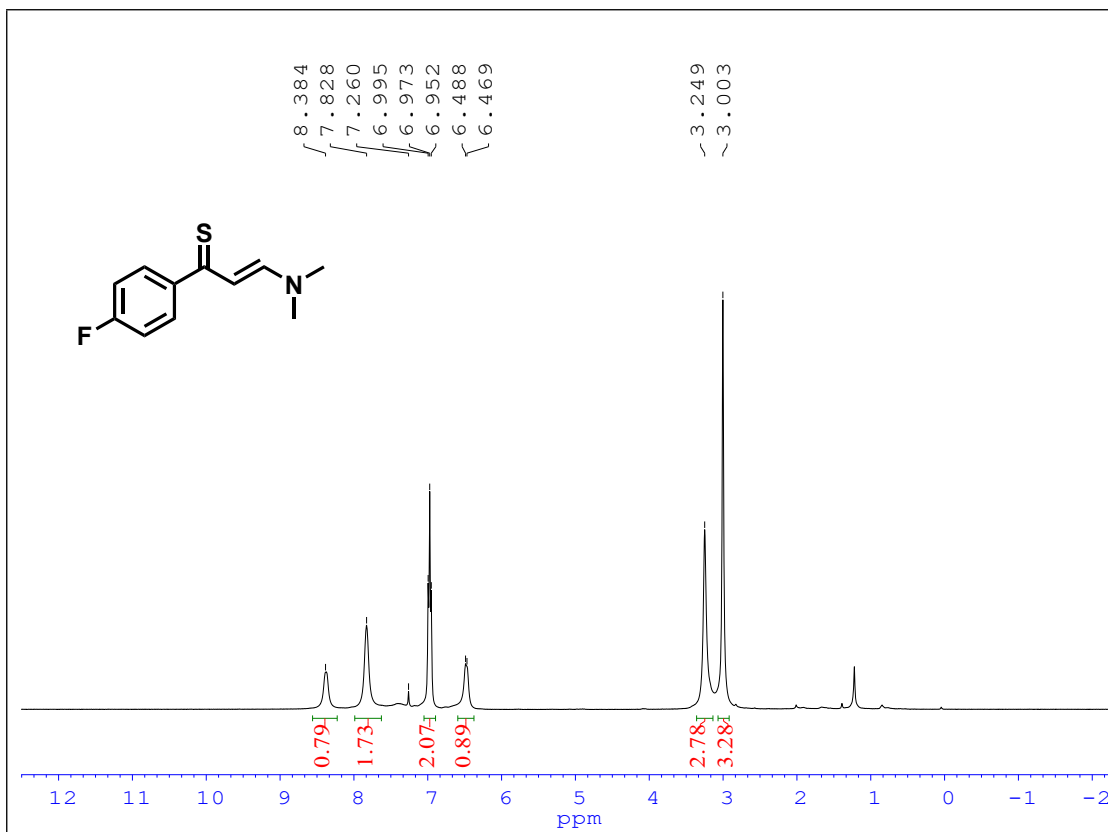

<sup>19</sup>F NMR spectra of **1h**

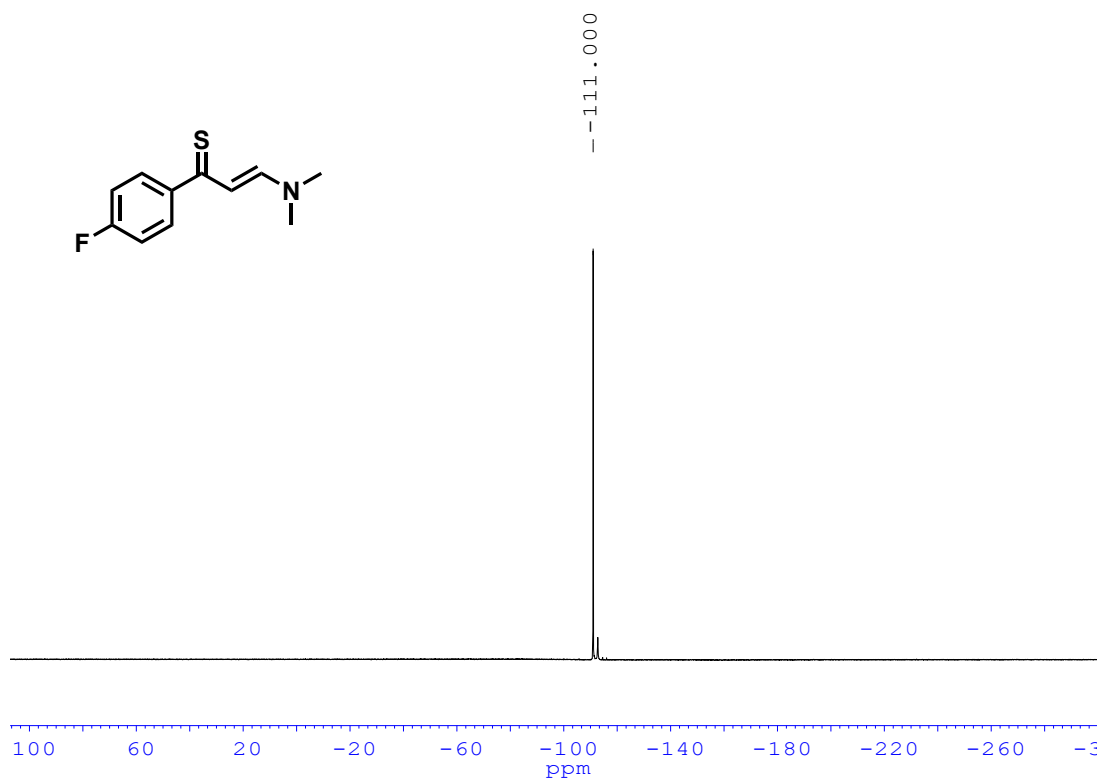

<sup>13</sup>C NMR spectra of **1h**

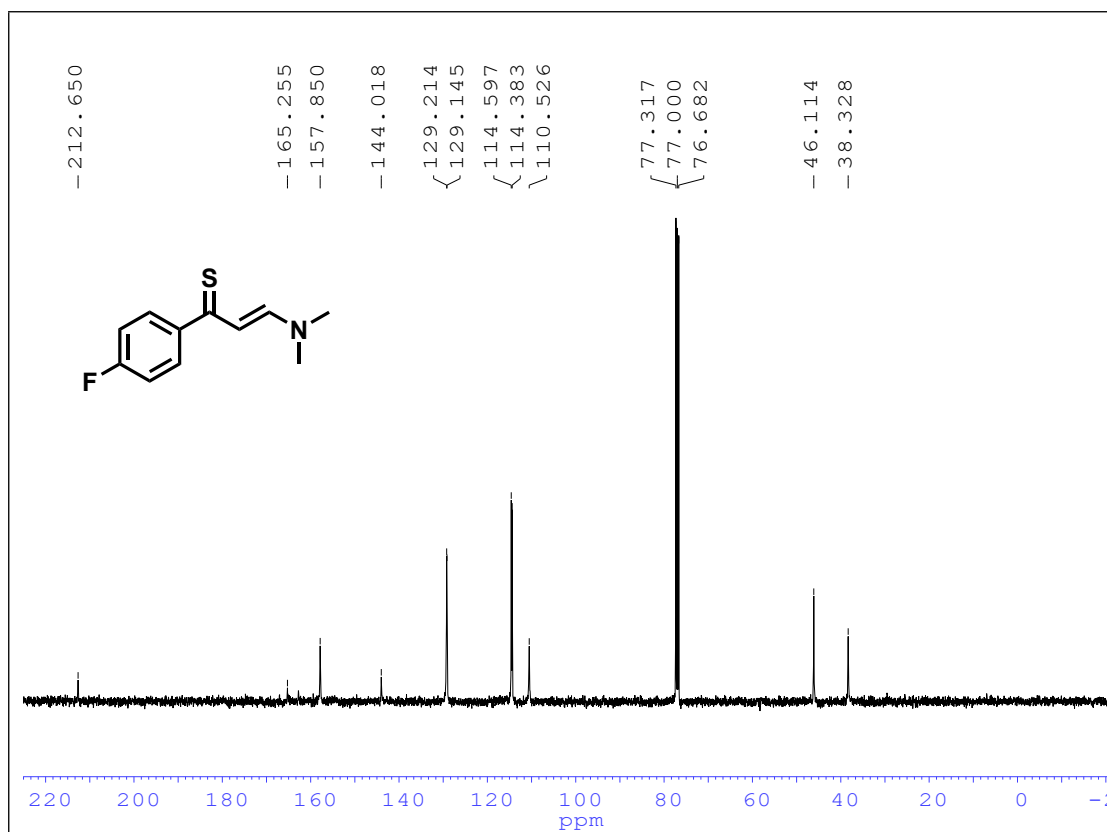

$^{13}\text{C}$  NMR spectra of **1i**

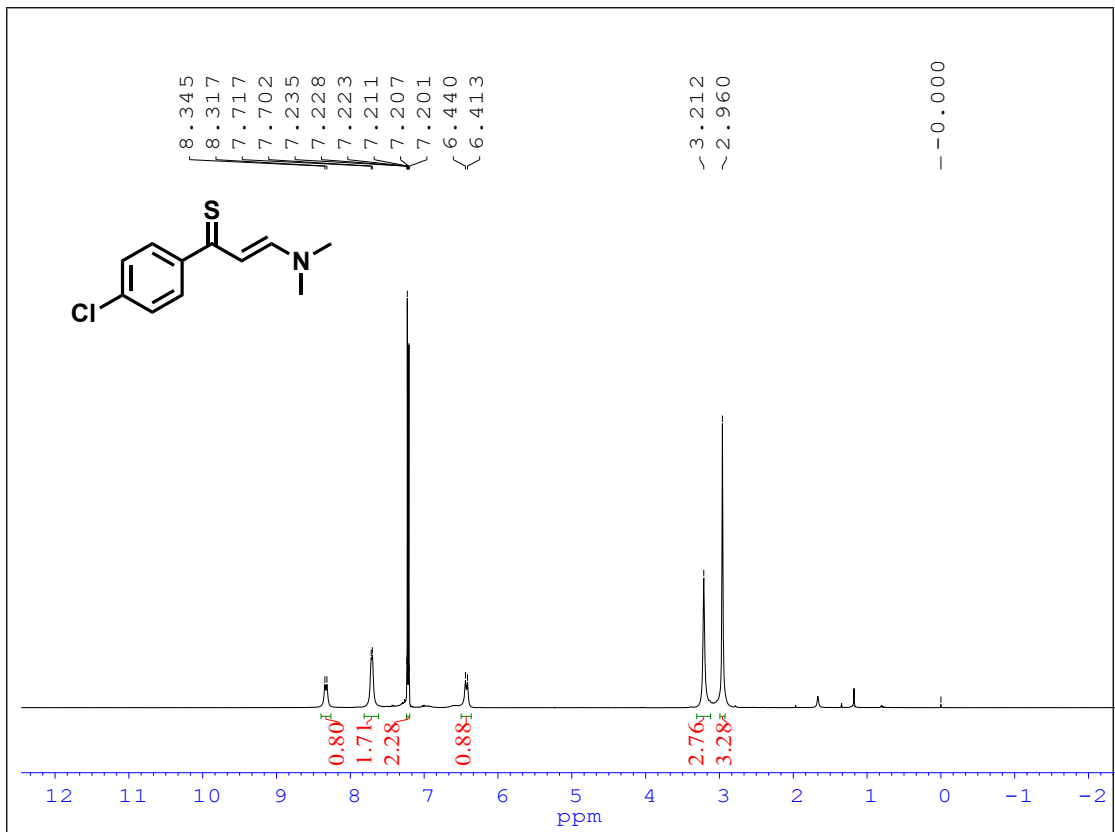

**<sup>13</sup>C NMR spectra of 1i**

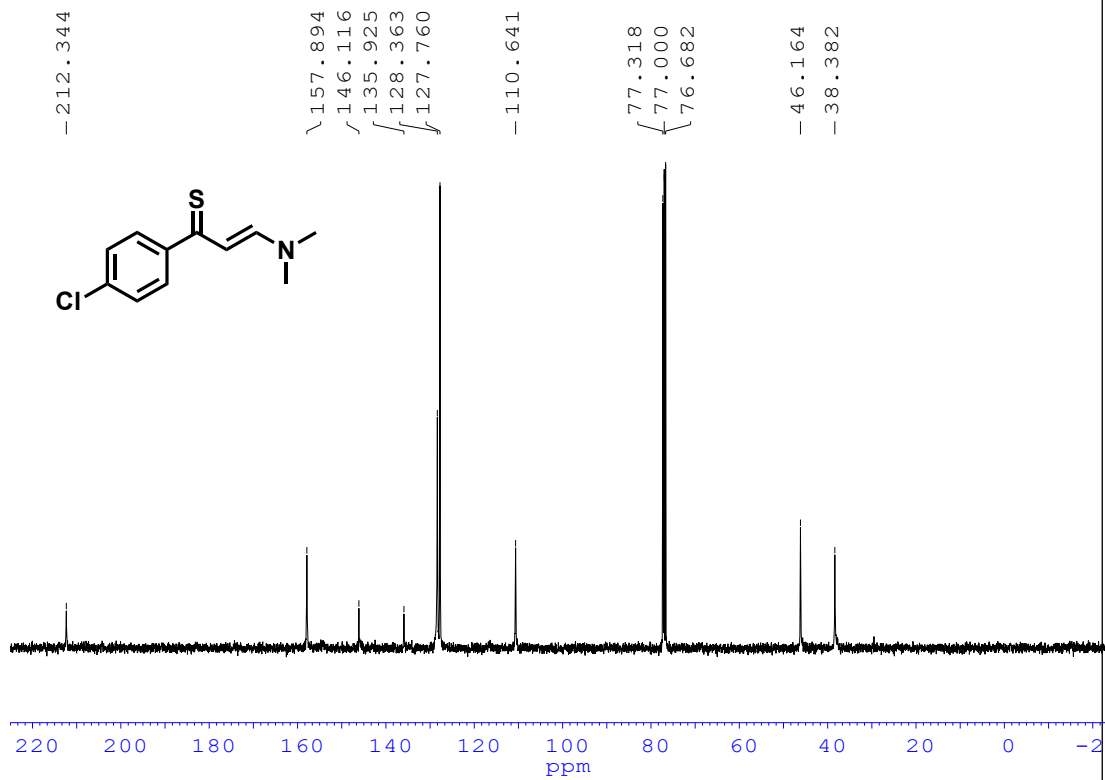

**<sup>1</sup>H NMR spectra of 1j**



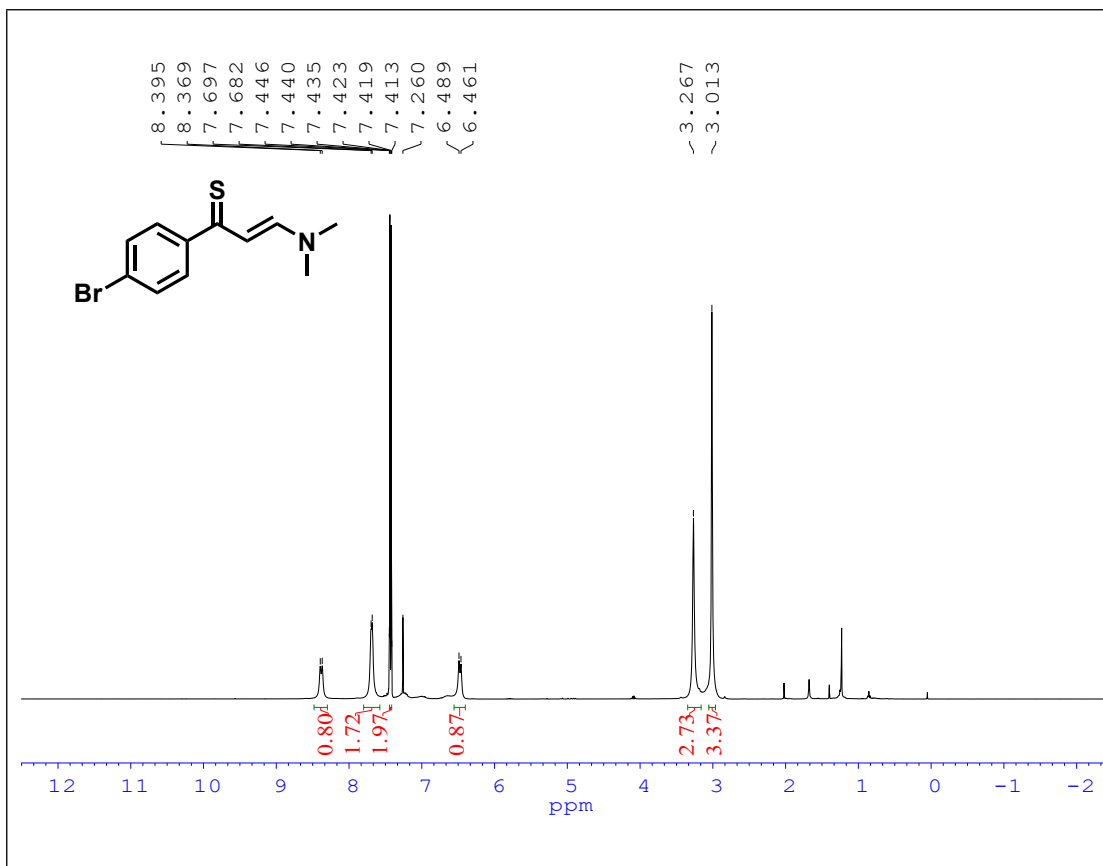

**<sup>13</sup>C NMR spectra of 1j**

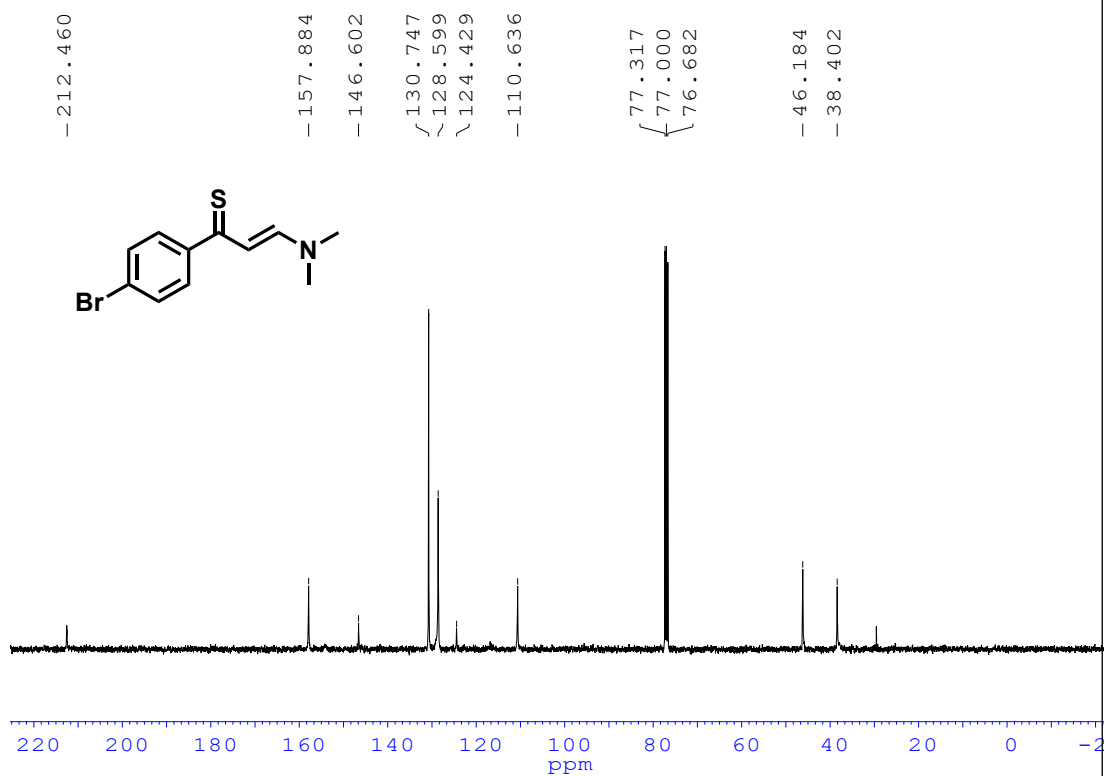

**<sup>1</sup>H NMR spectra of 1k**

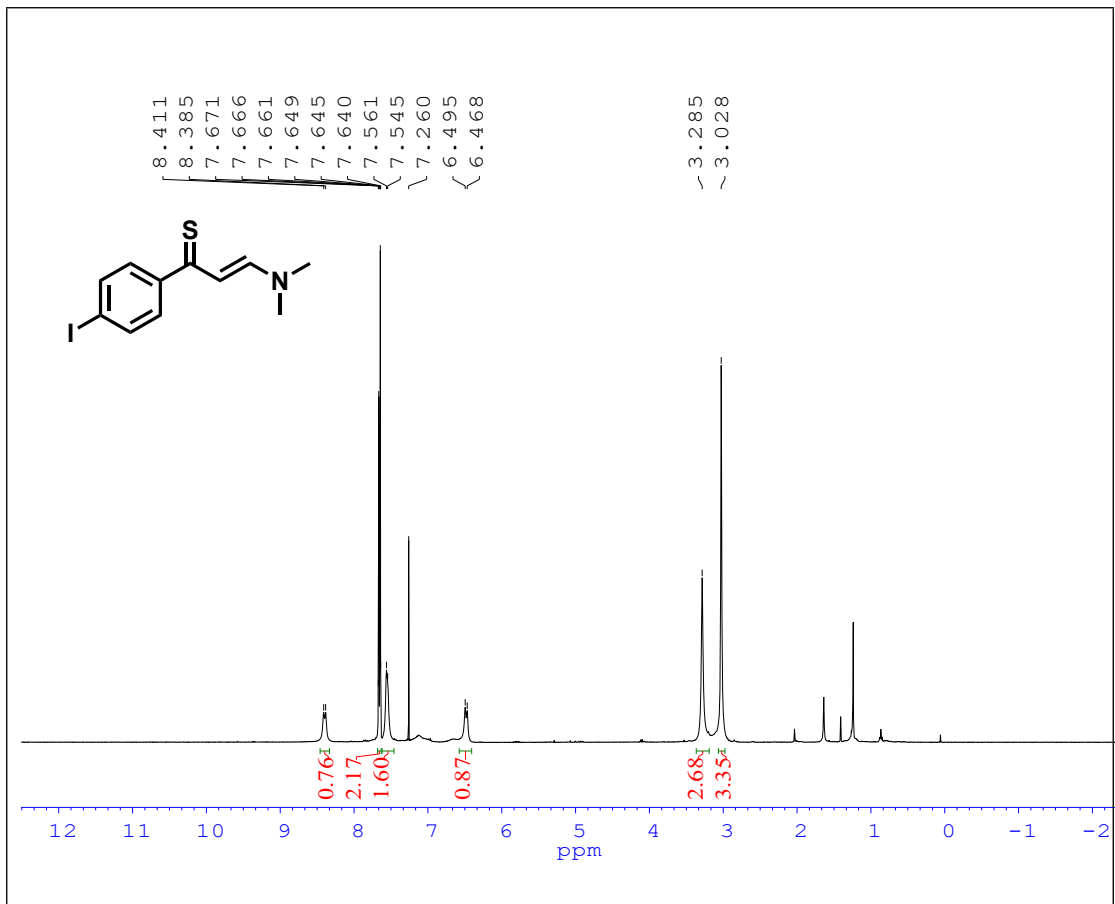

**<sup>13</sup>C NMR spectra of 1k**

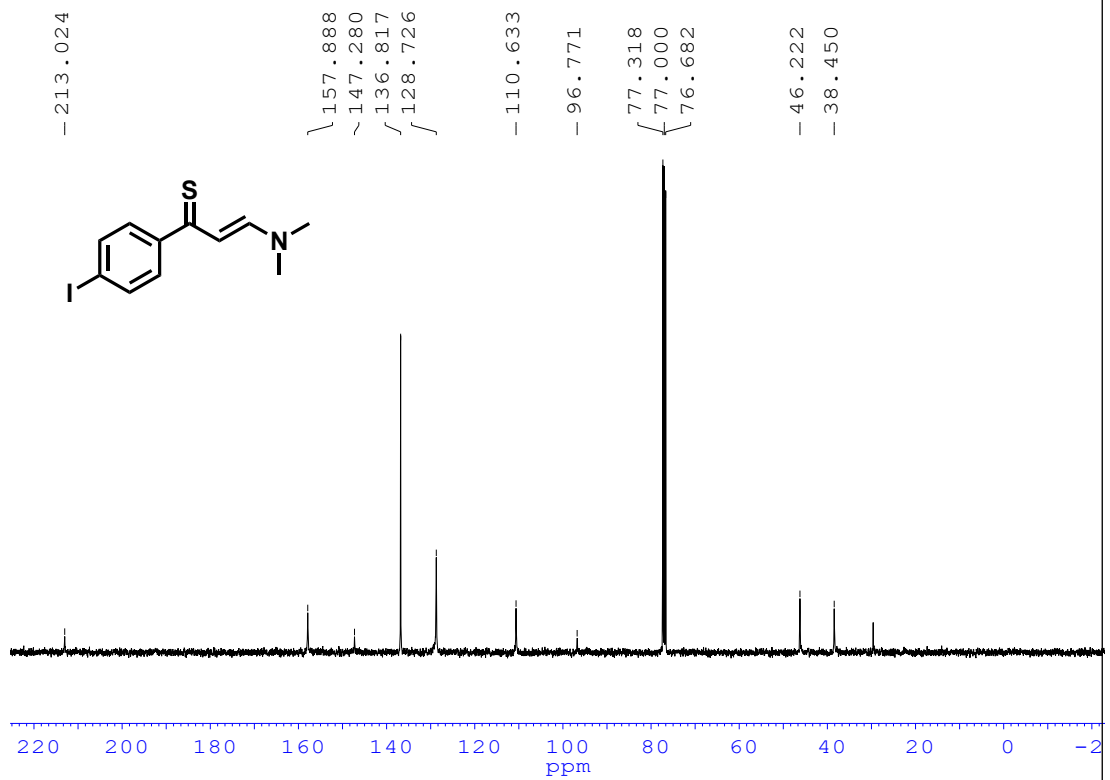

**<sup>1</sup>H NMR spectra of 1l**

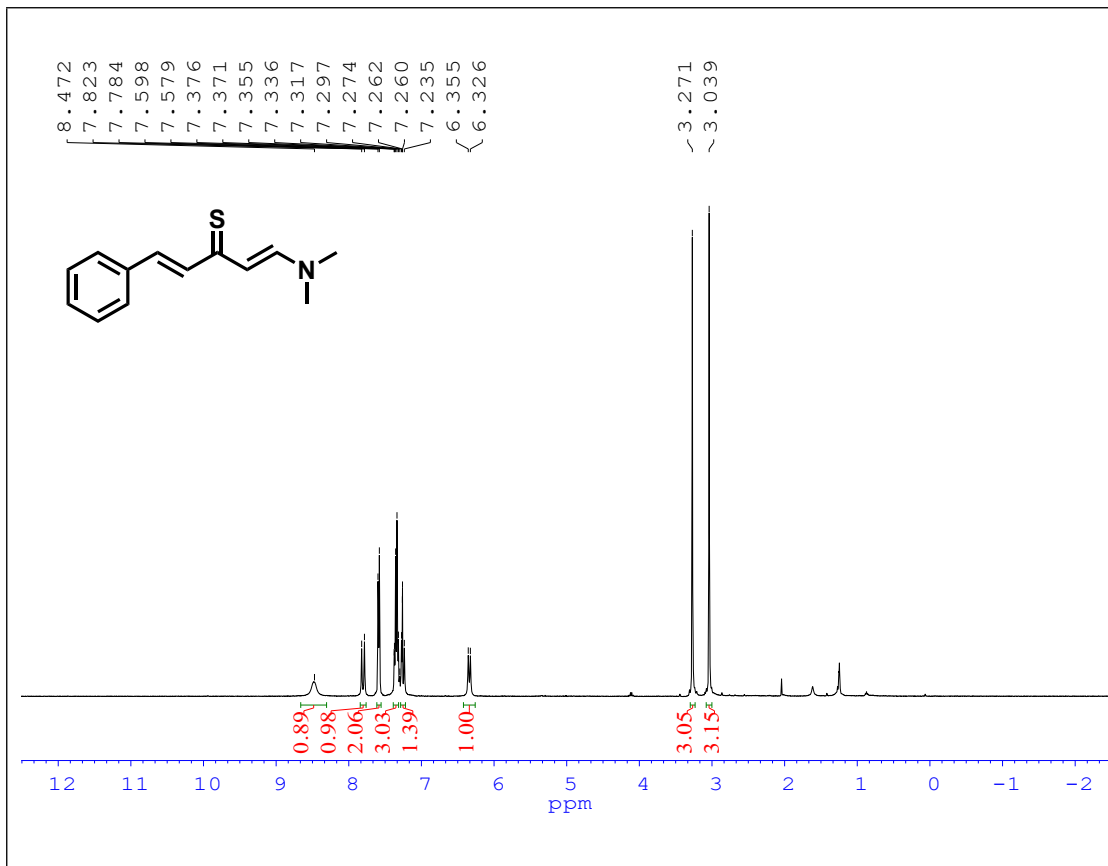

**<sup>13</sup>C NMR spectra of 1l**

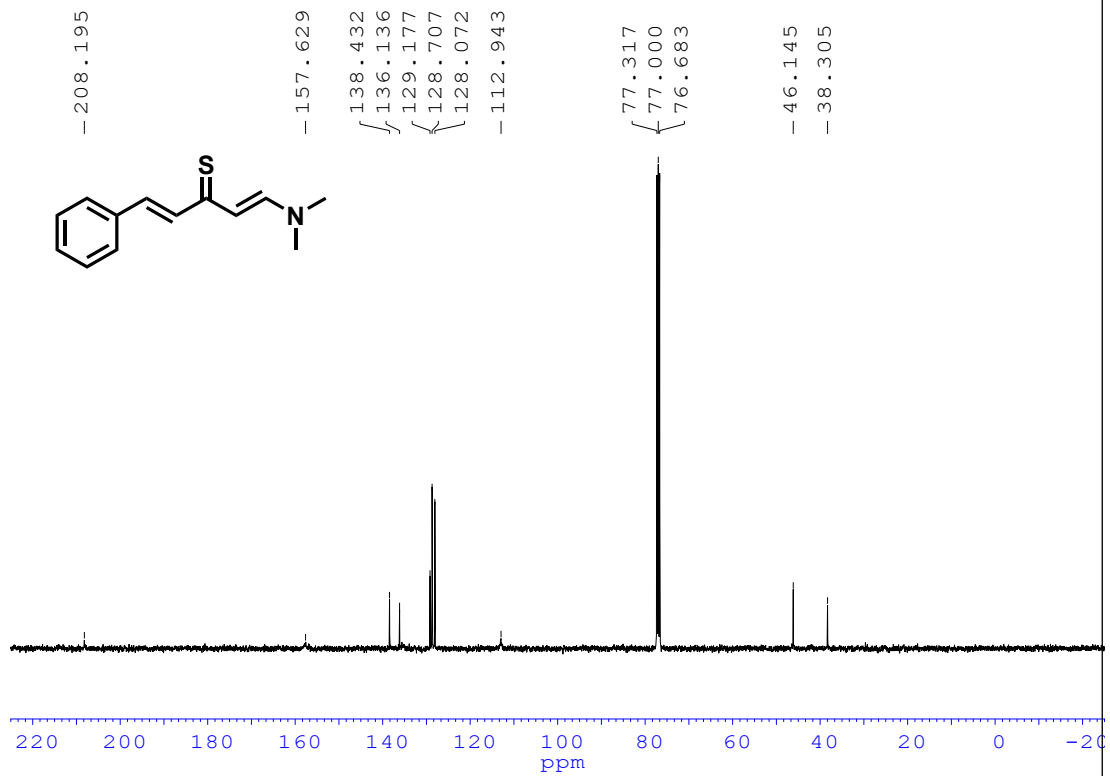

**<sup>1</sup>H NMR spectra of 1m**

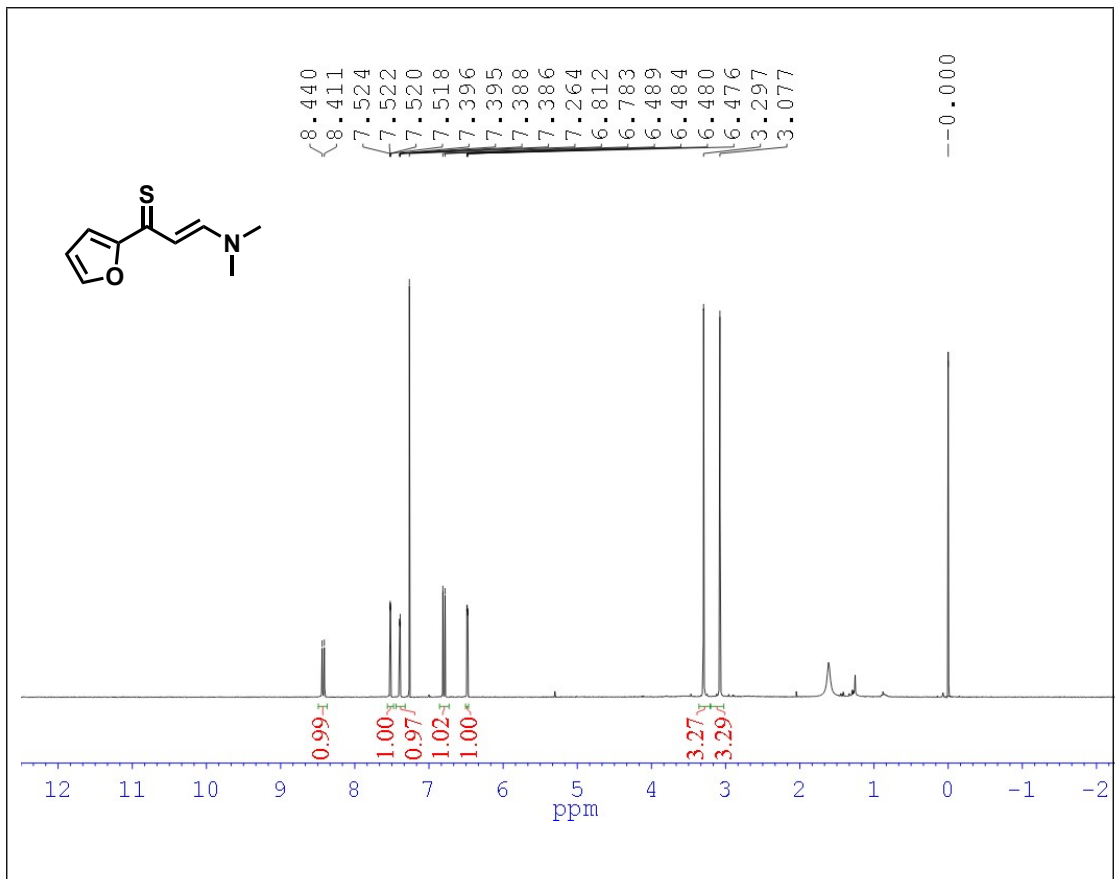

**<sup>13</sup>C NMR spectra of 1m**

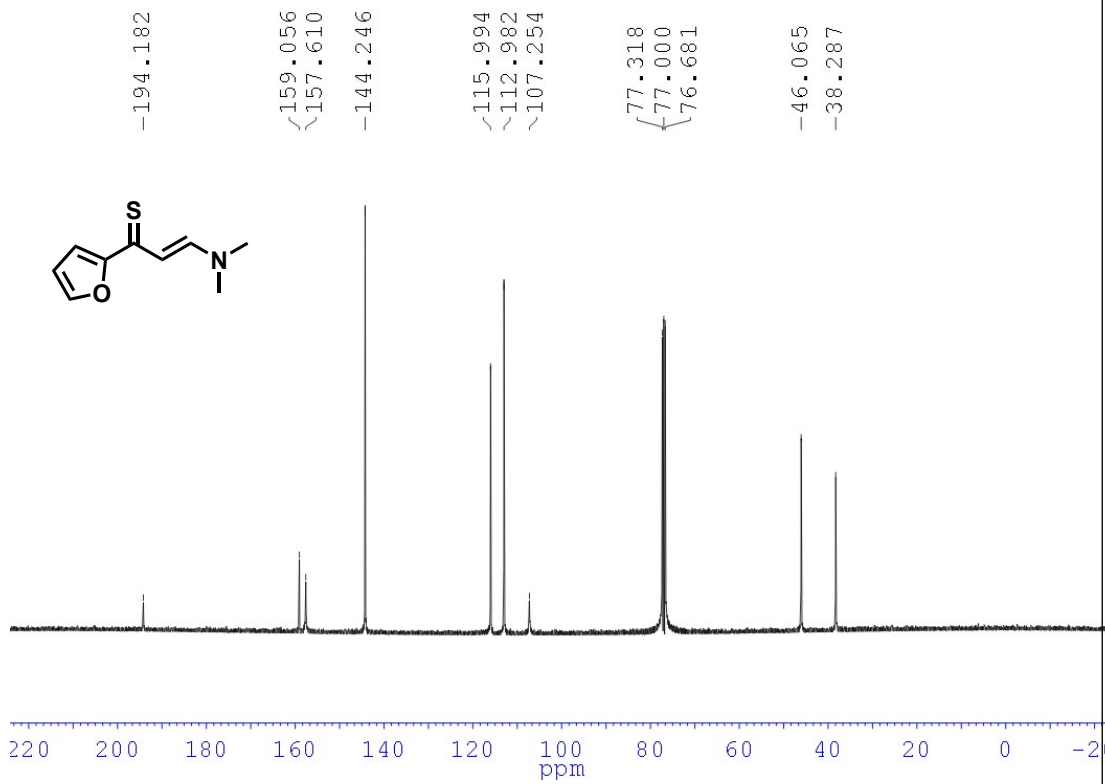

**<sup>1</sup>H NMR spectra of 1n**

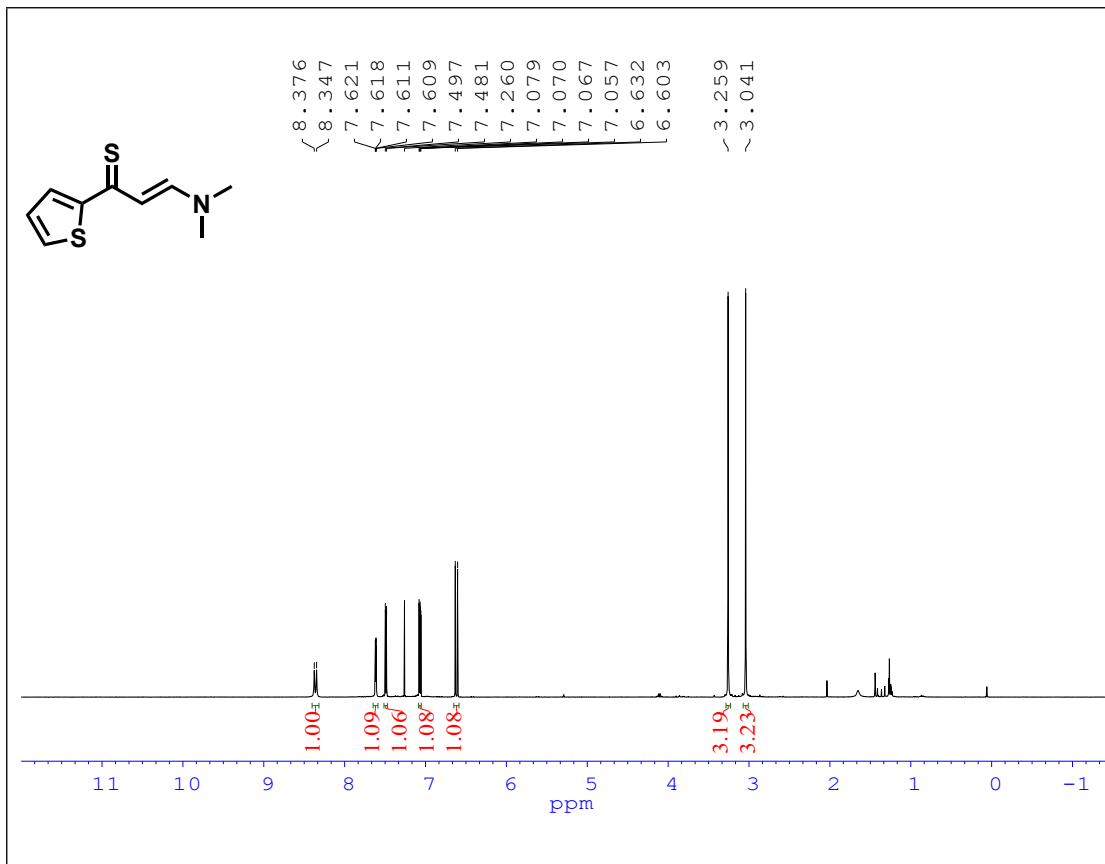

**<sup>13</sup>C NMR spectra of 1n**

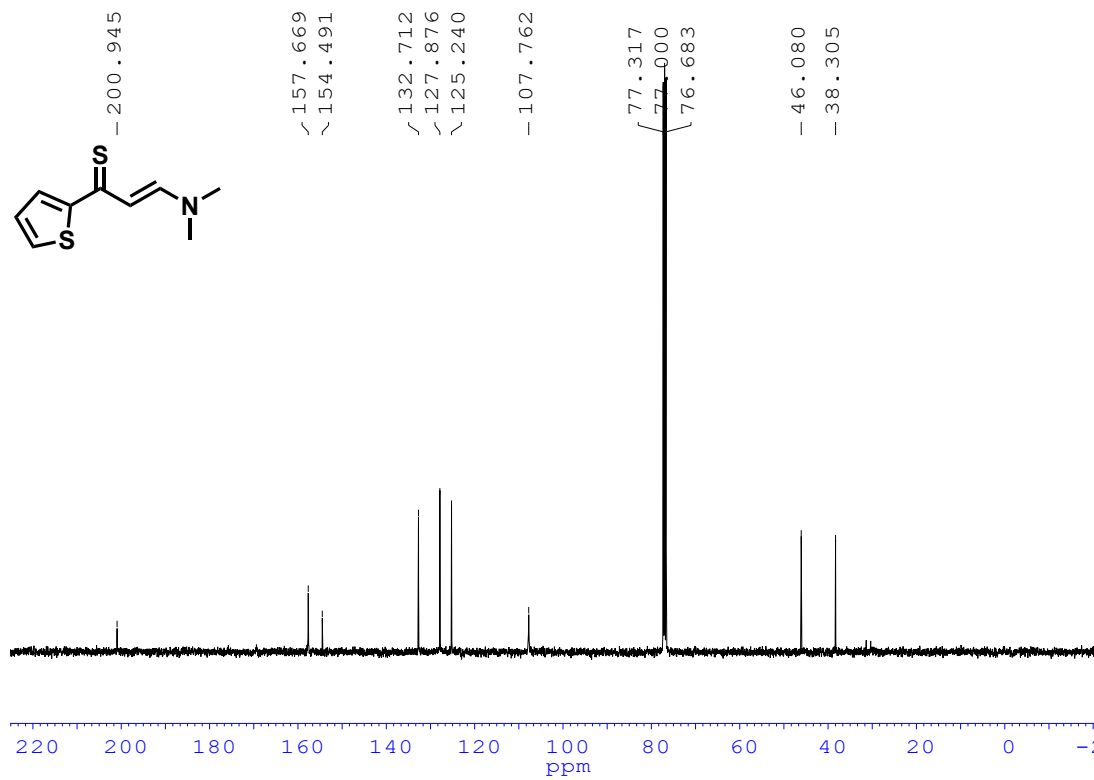

**<sup>1</sup>H NMR spectra of 1o**

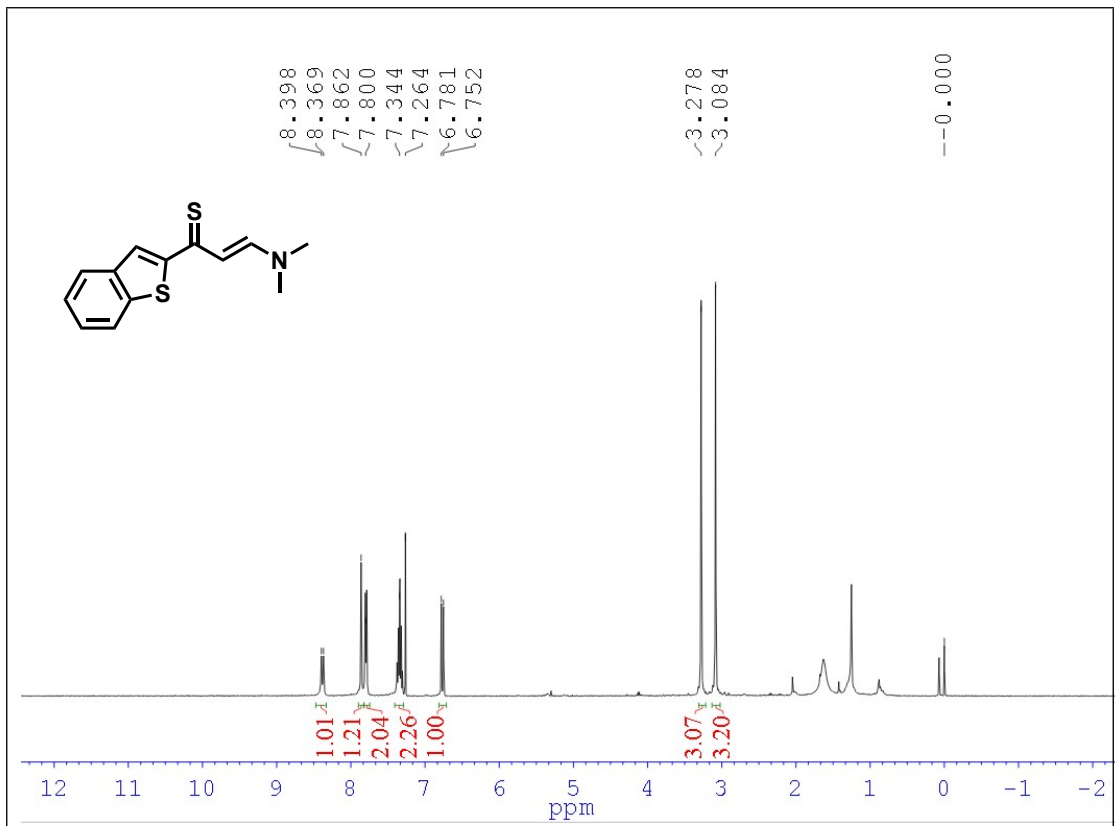

**<sup>13</sup>C NMR spectra of 1o**

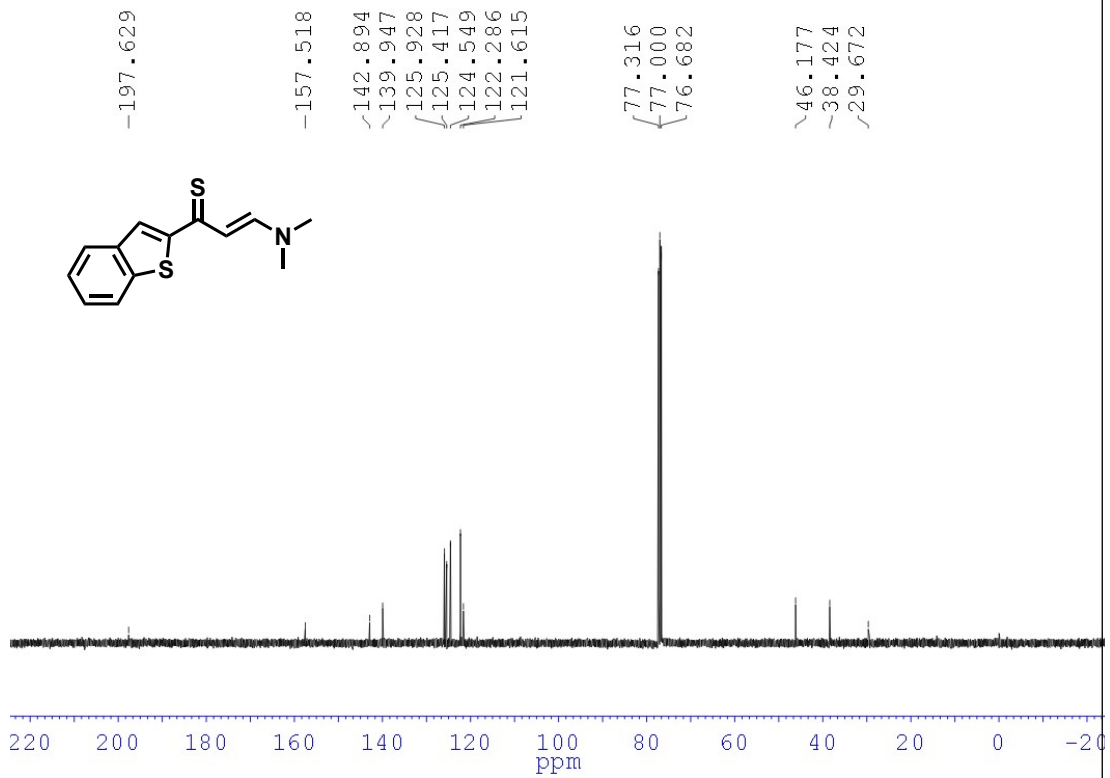

**<sup>1</sup>H NMR spectra of 1p**

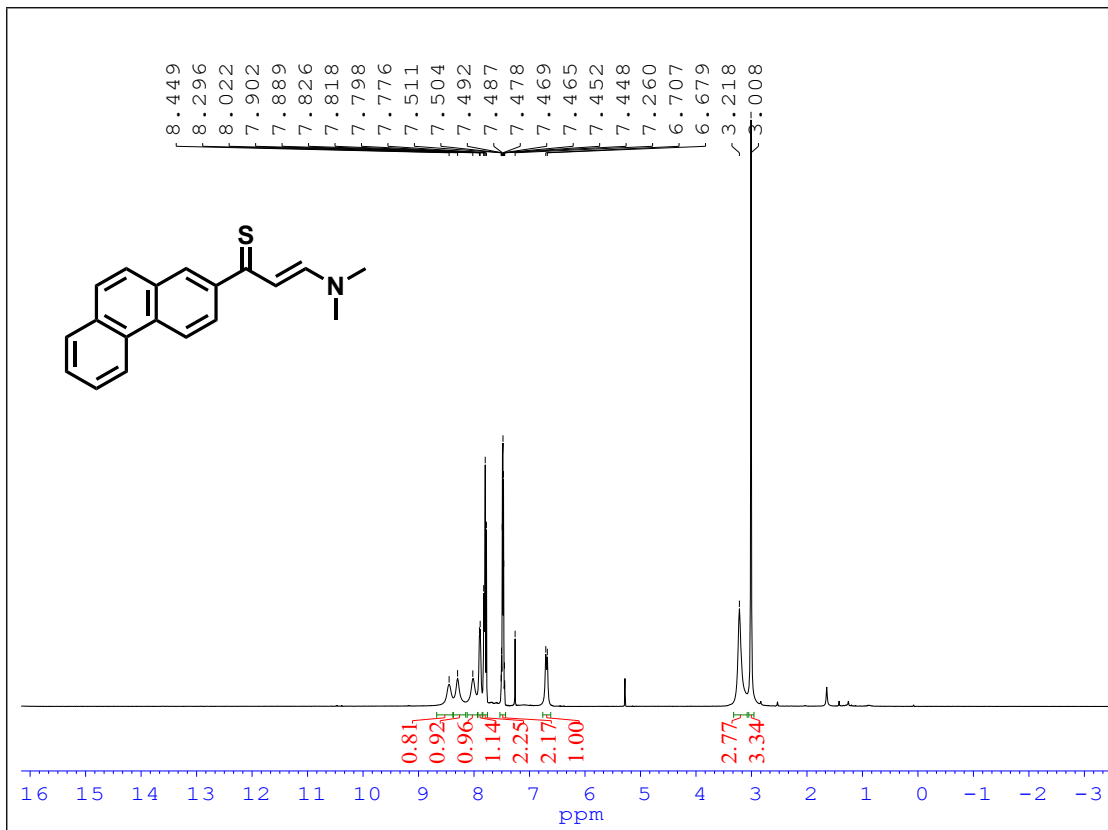

**<sup>13</sup>C NMR spectra of 1p**

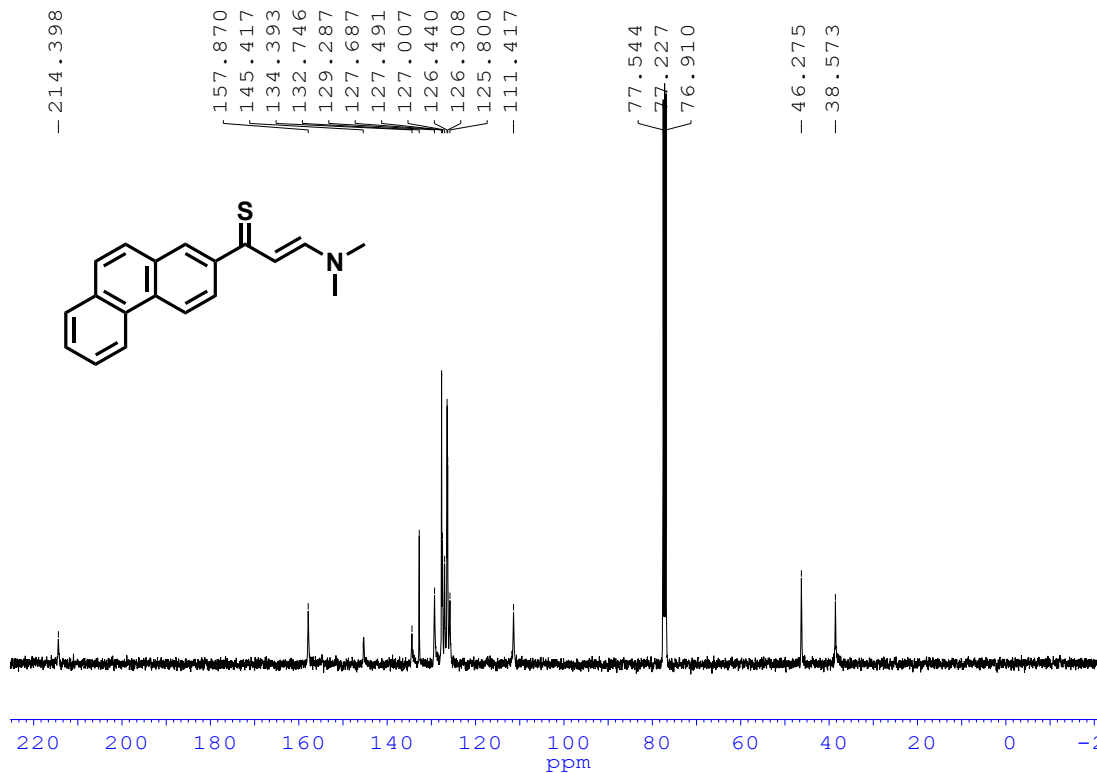

<sup>1</sup>H NMR spectra of **1q**

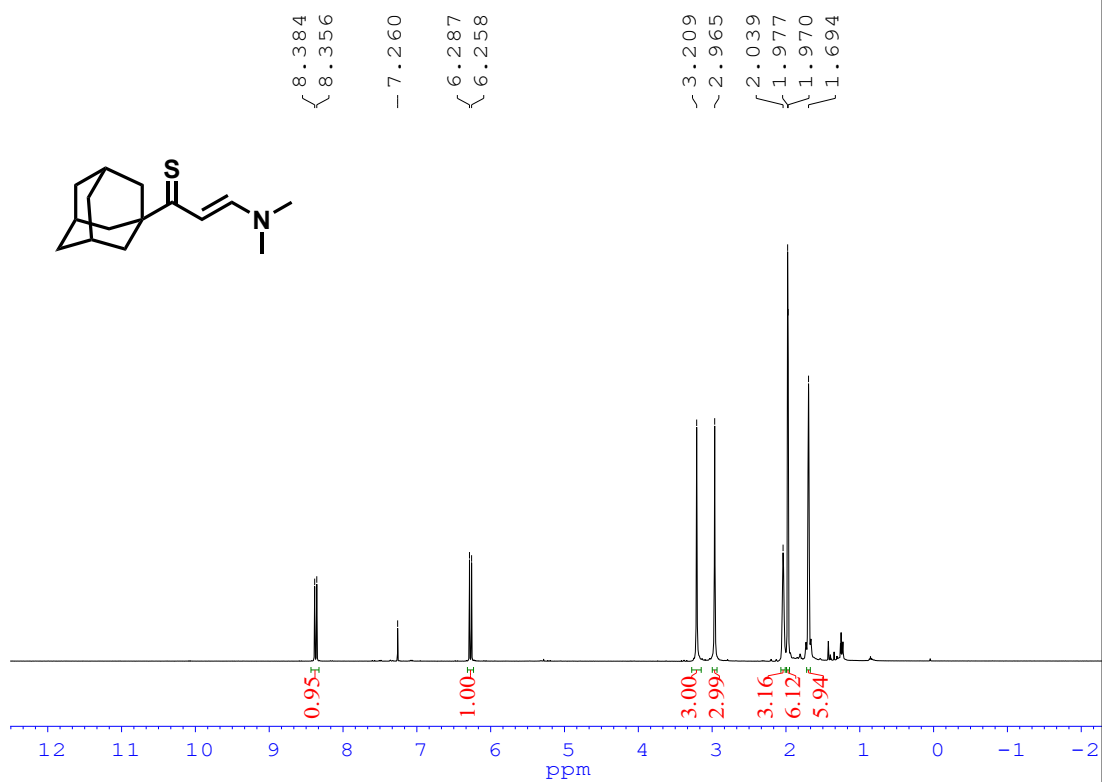

<sup>13</sup>C NMR spectra of **1q**

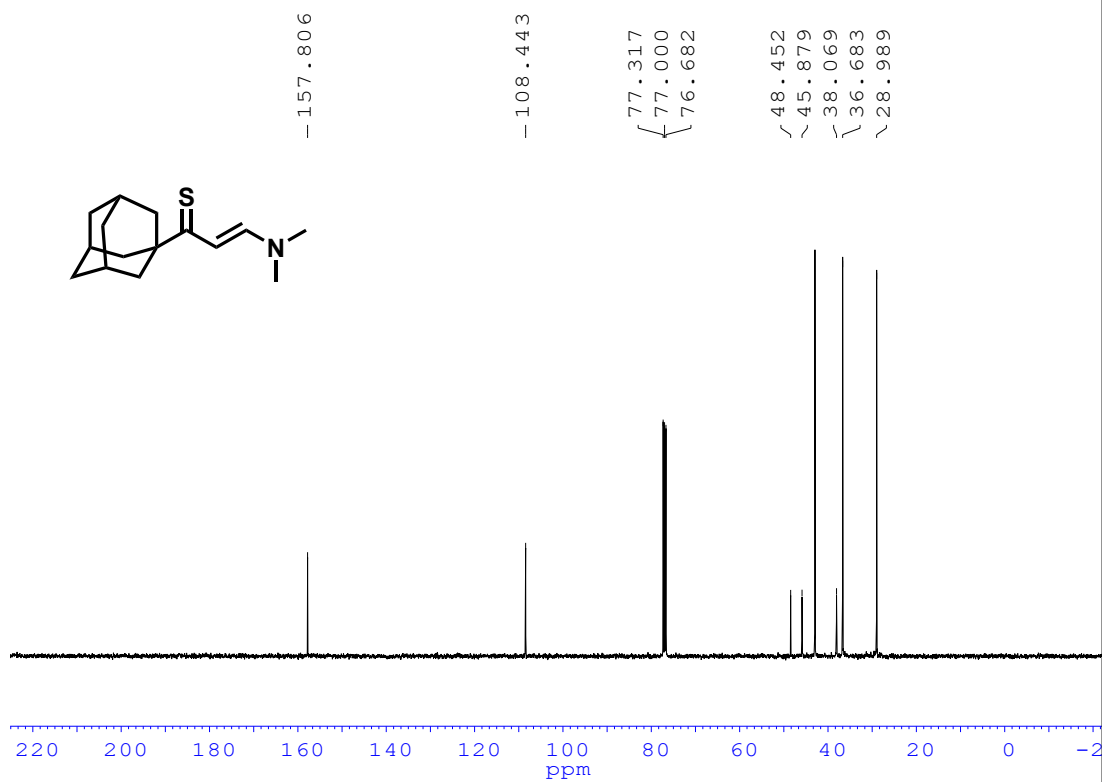



<sup>1</sup>H NMR spectra of **1r**

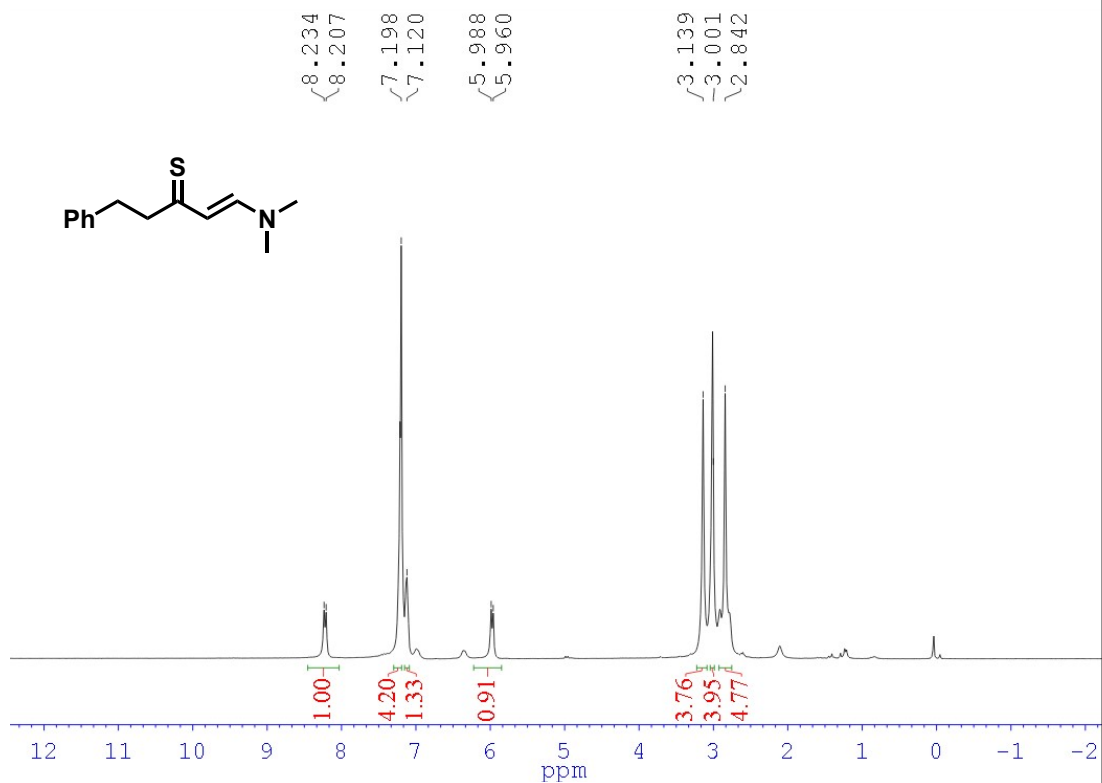

<sup>13</sup>C NMR spectra of **1r**

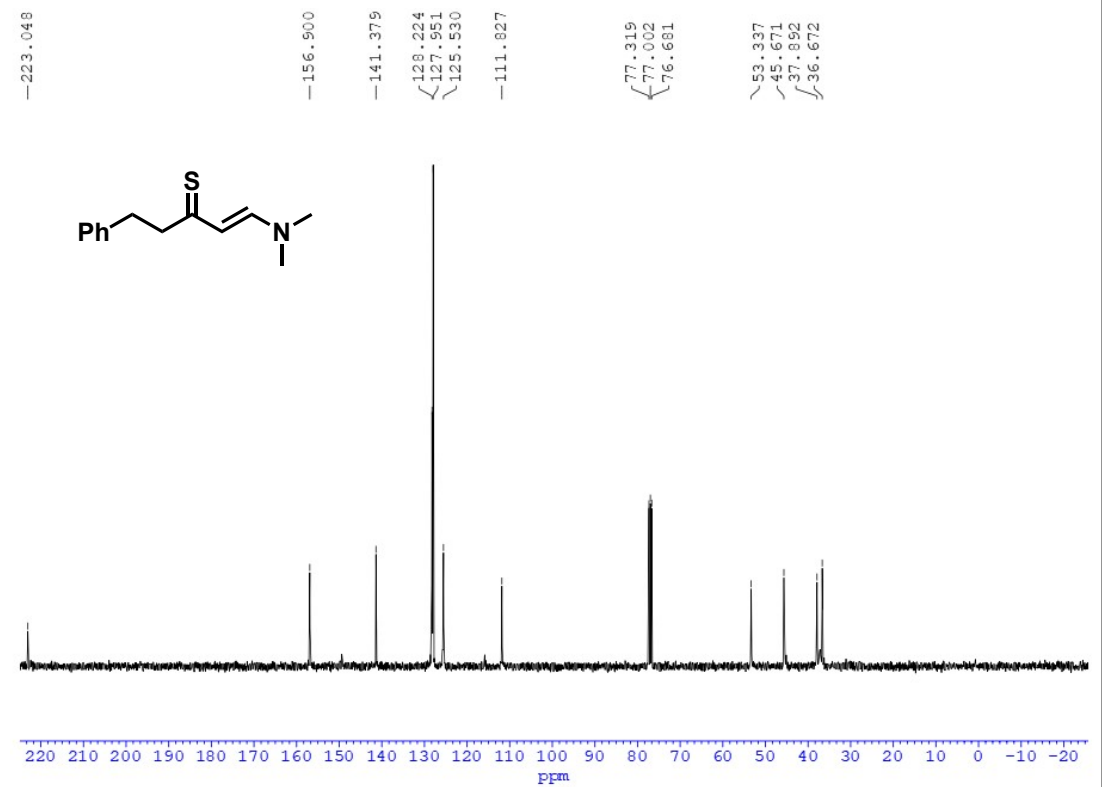

<sup>1</sup>H NMR spectra of **1s**

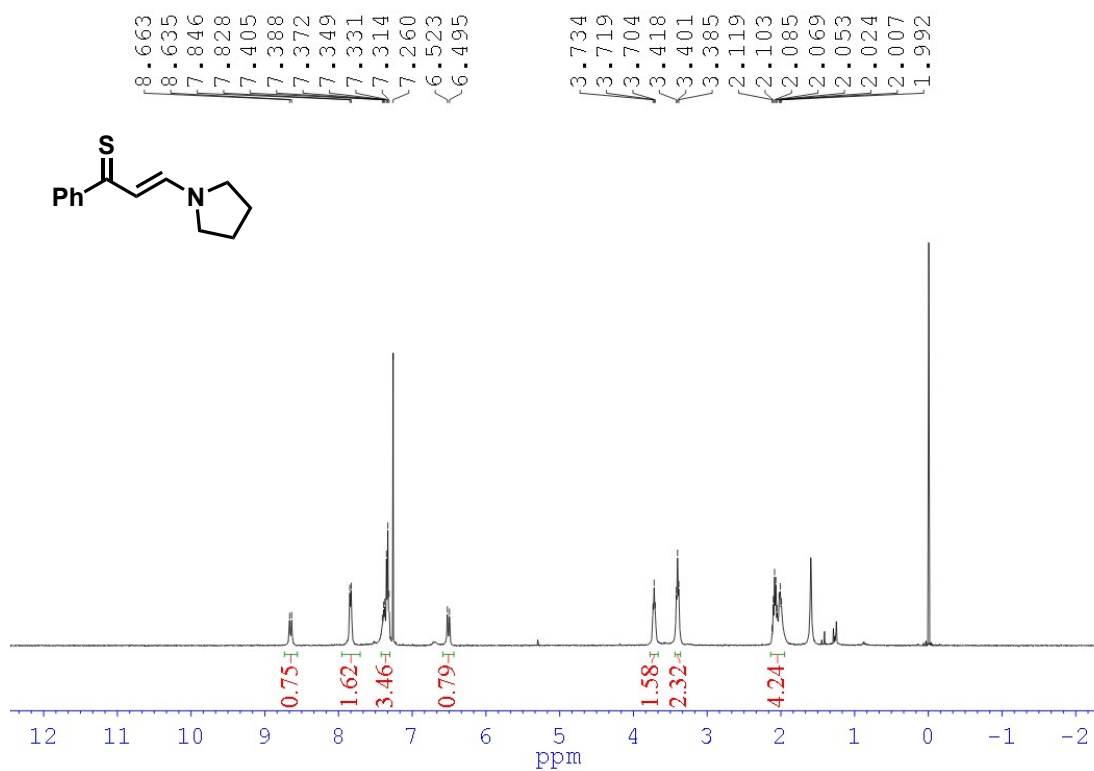

<sup>13</sup>C NMR spectra of **1s**

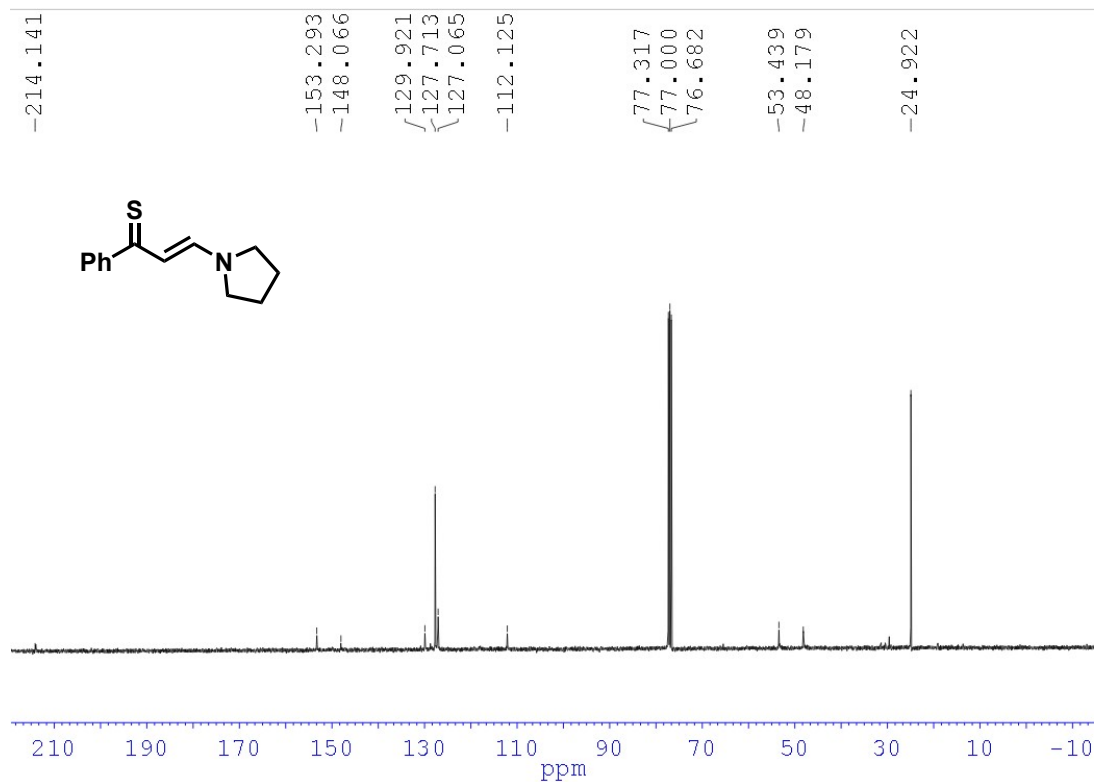

## 4.2 NMR spectra for hydrazones

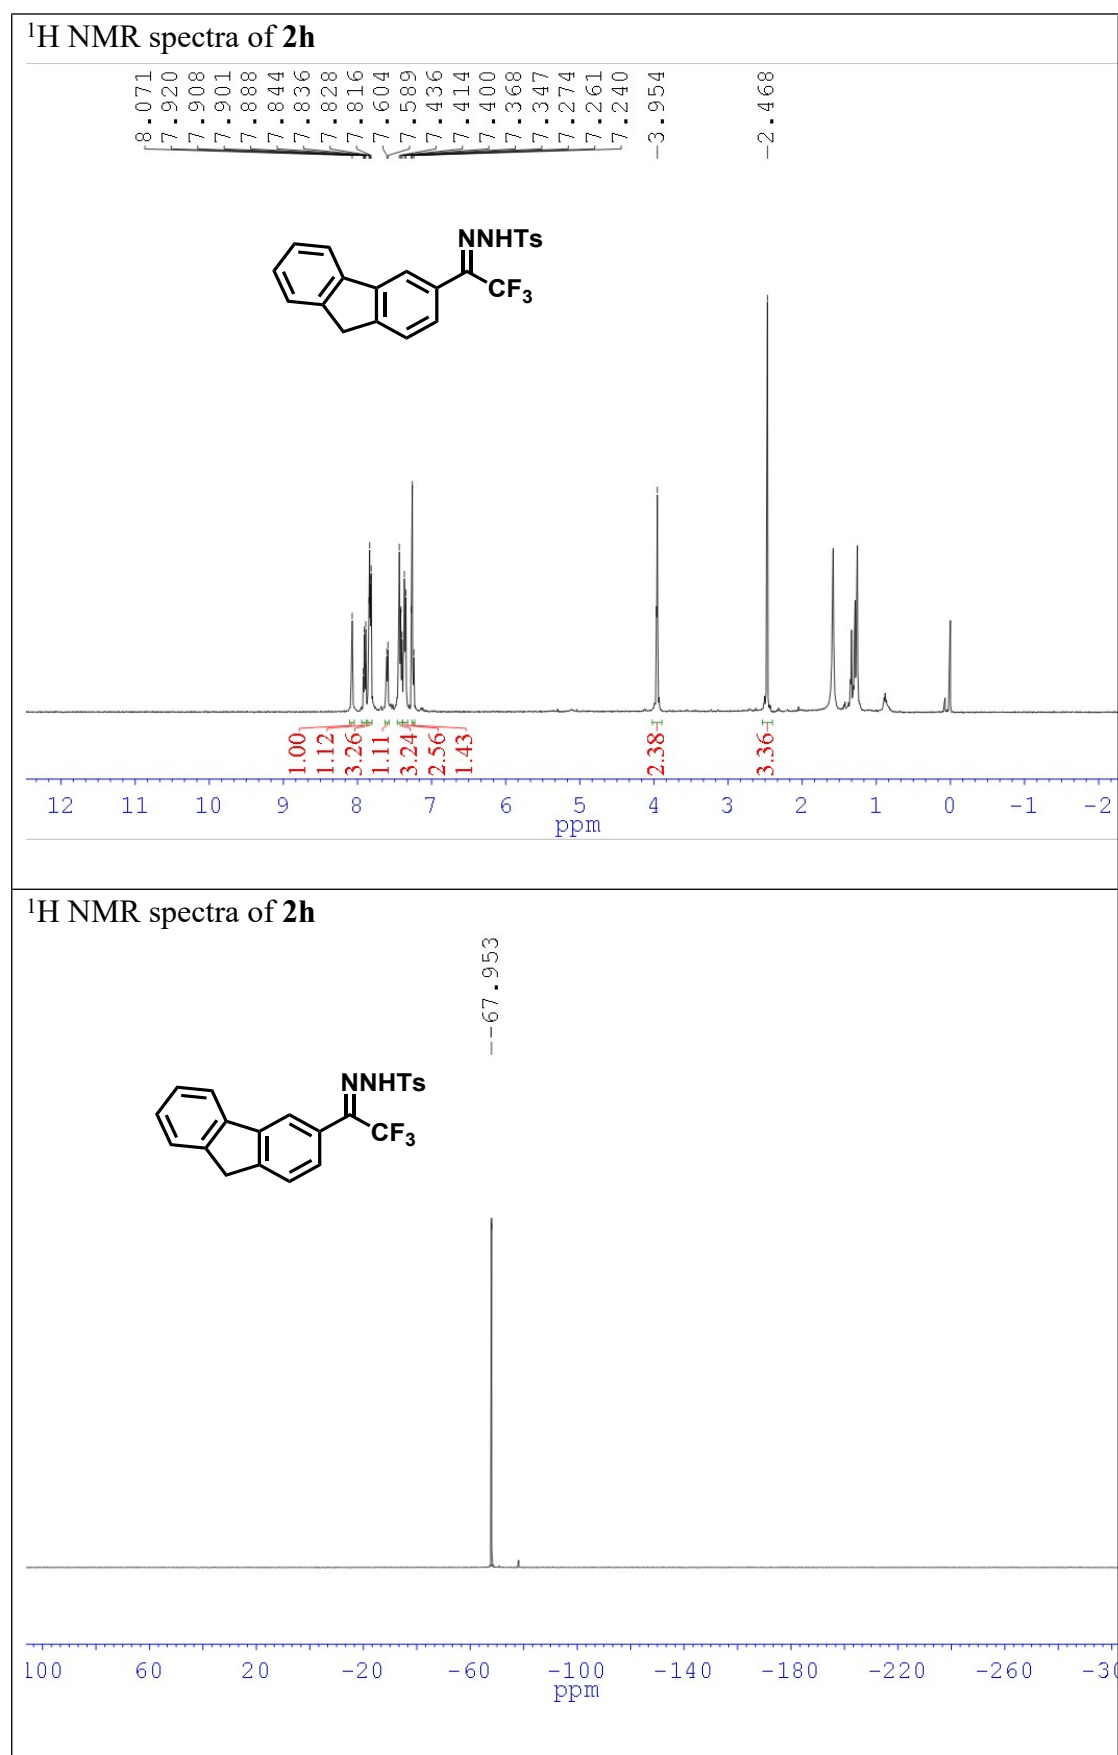

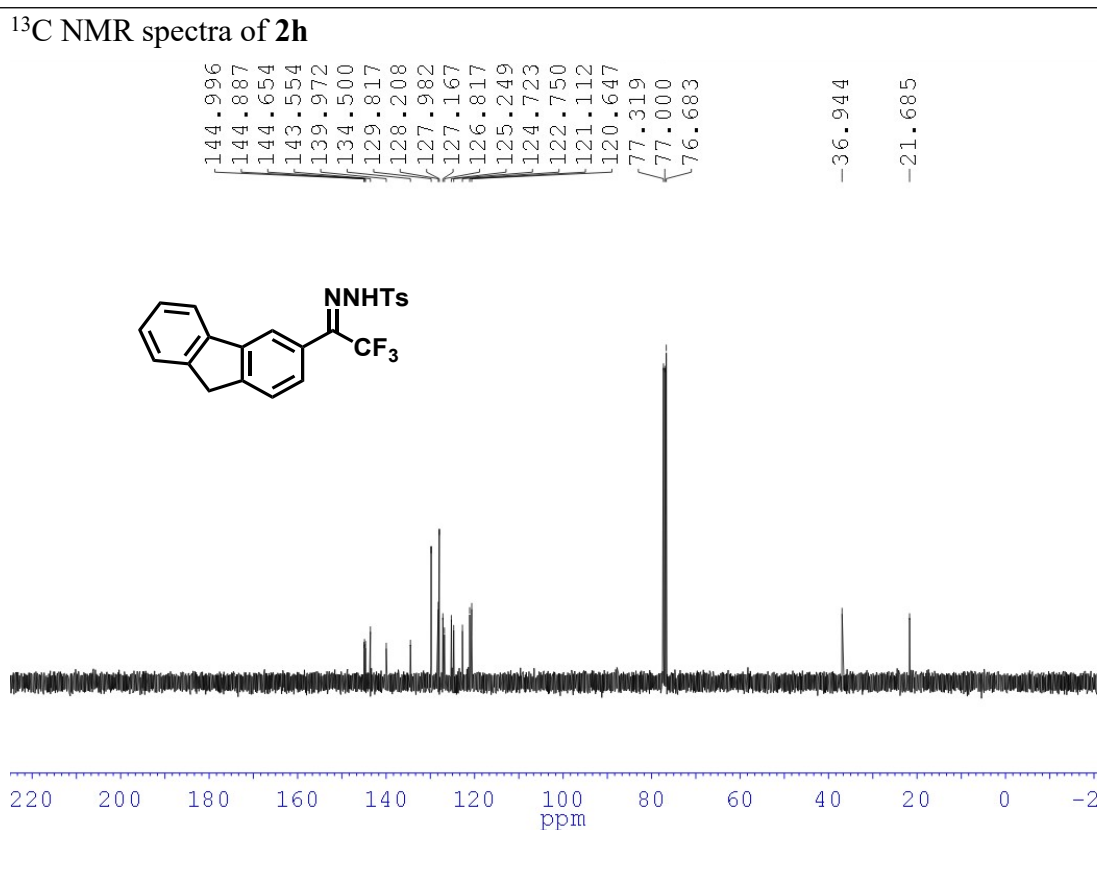

### 4.3 NMR spectra for 2-CF<sub>3</sub>-2*H*-thiophenes

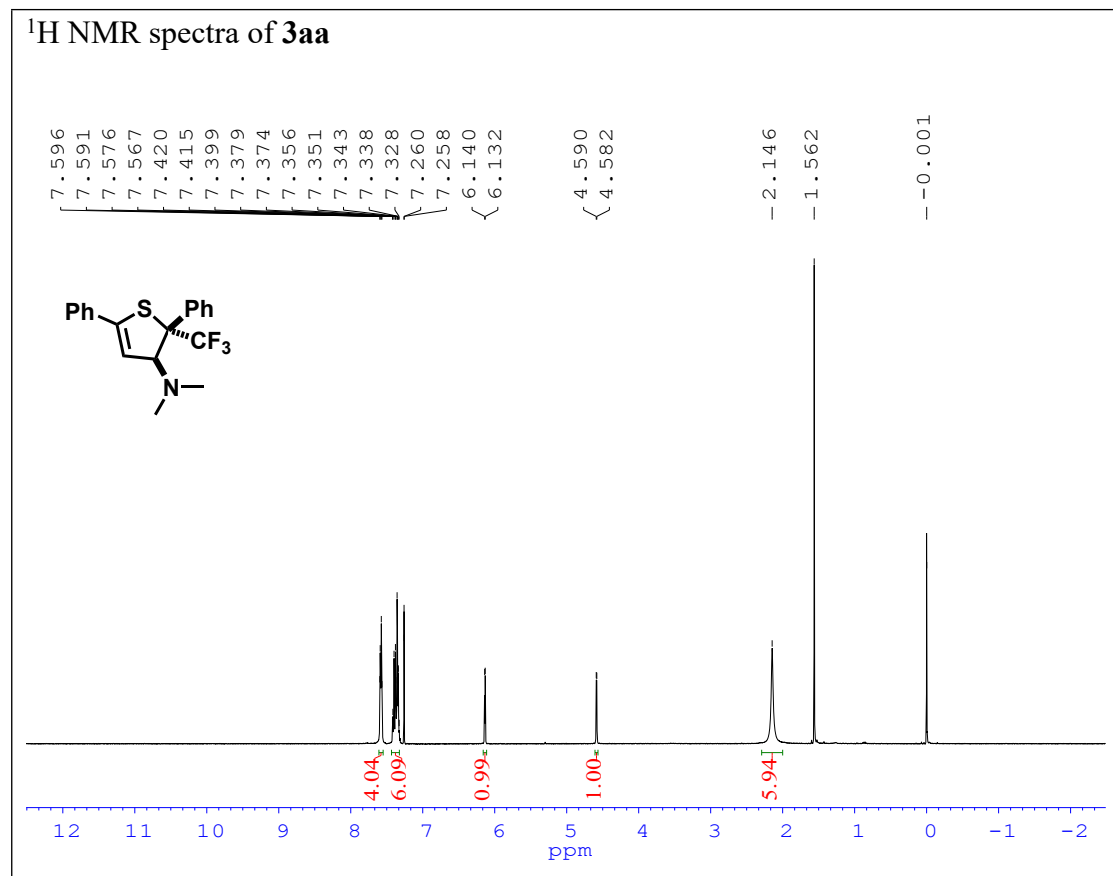

<sup>19</sup>F NMR spectra of **3aa**

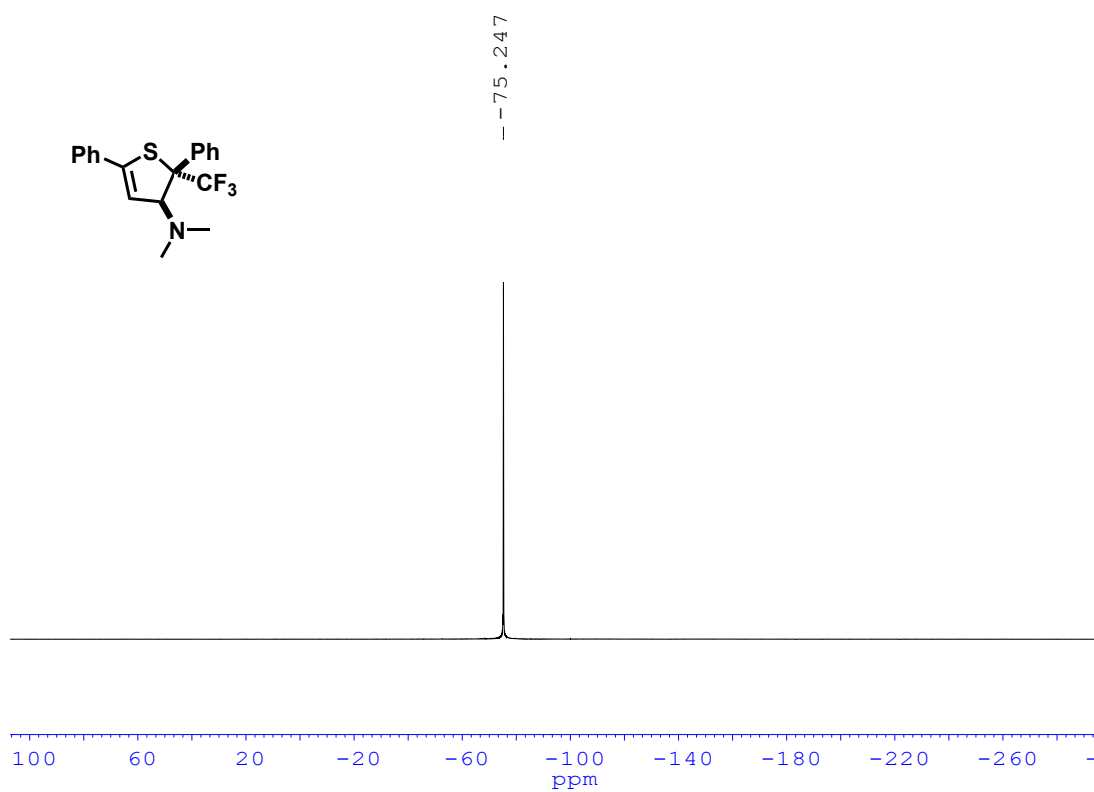

<sup>13</sup>C NMR spectra of **3aa**

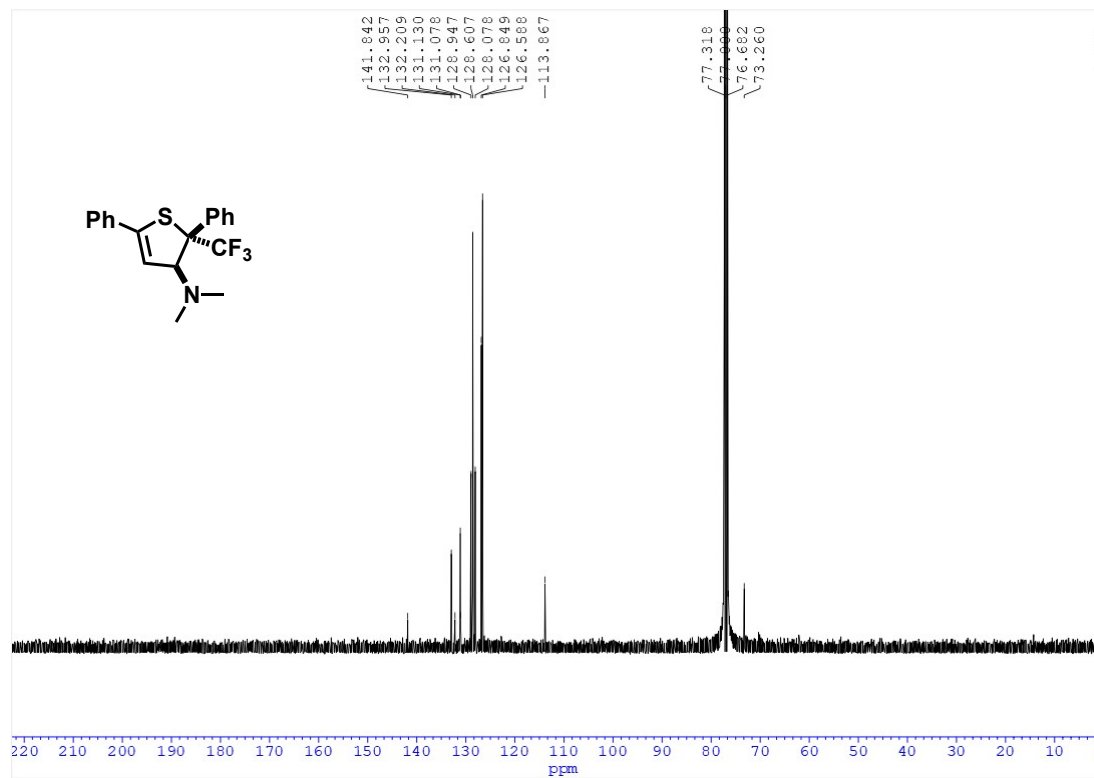

### <sup>1</sup>H NMR spectra of **3ab**

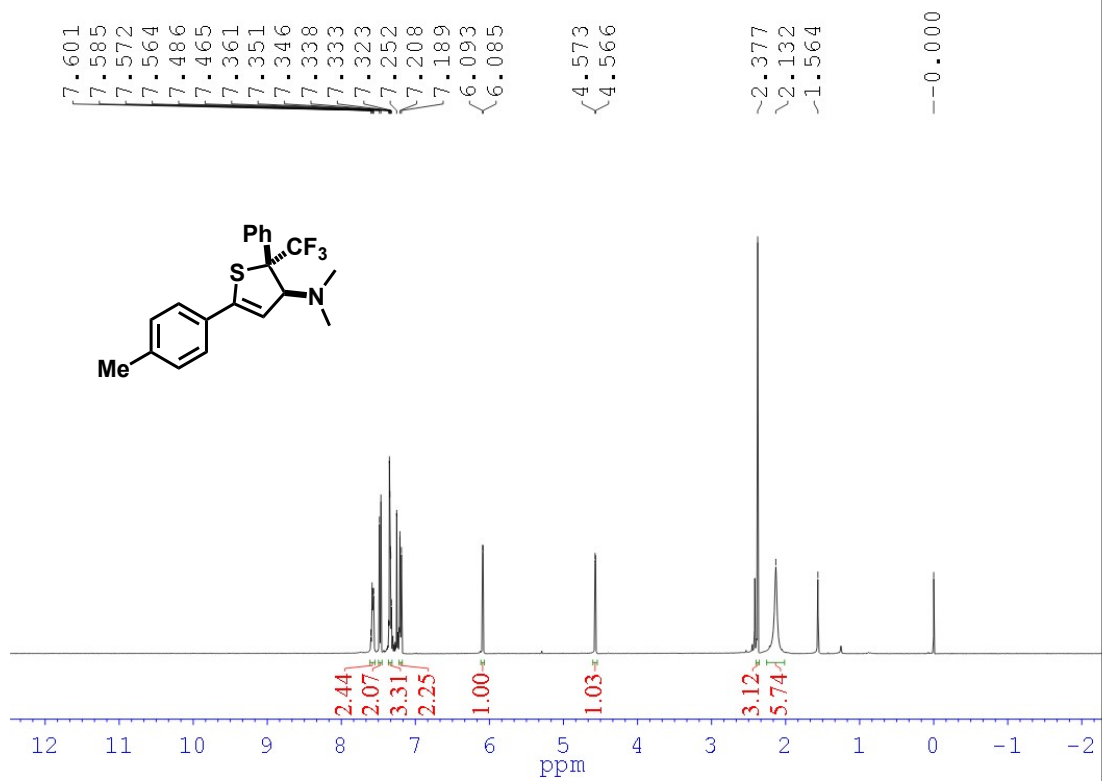

### <sup>19</sup>F NMR spectra of **3ab**

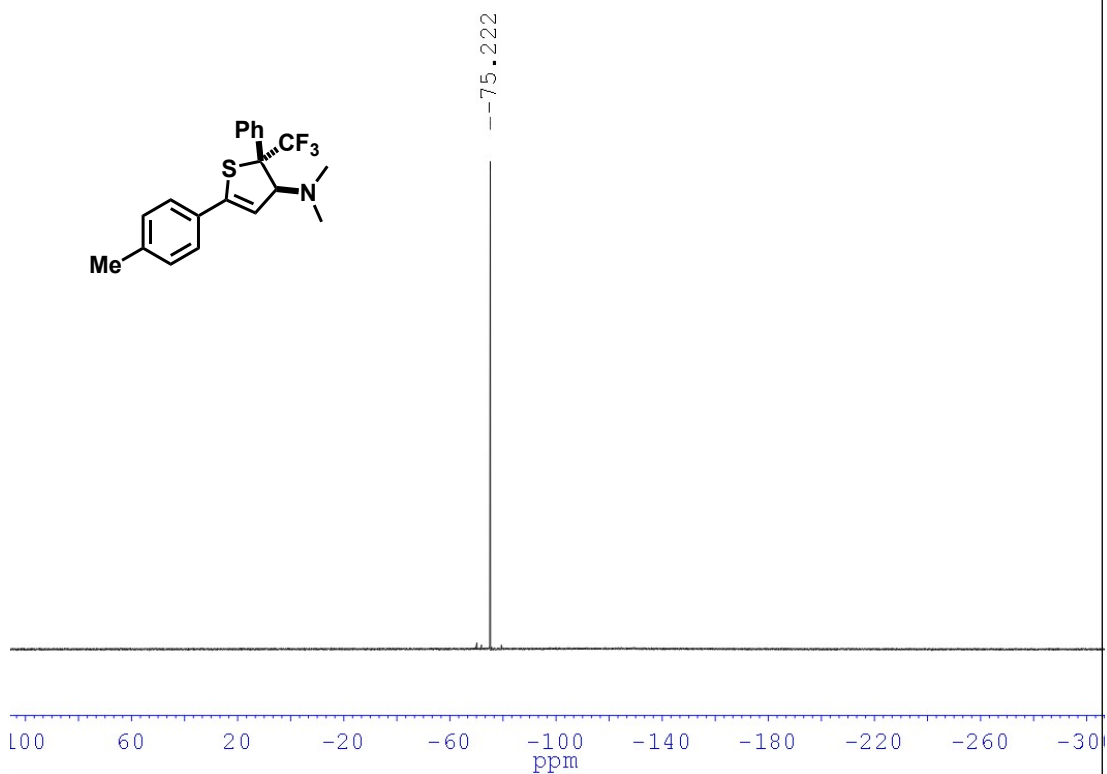

### <sup>13</sup>C NMR spectra of **3ab**

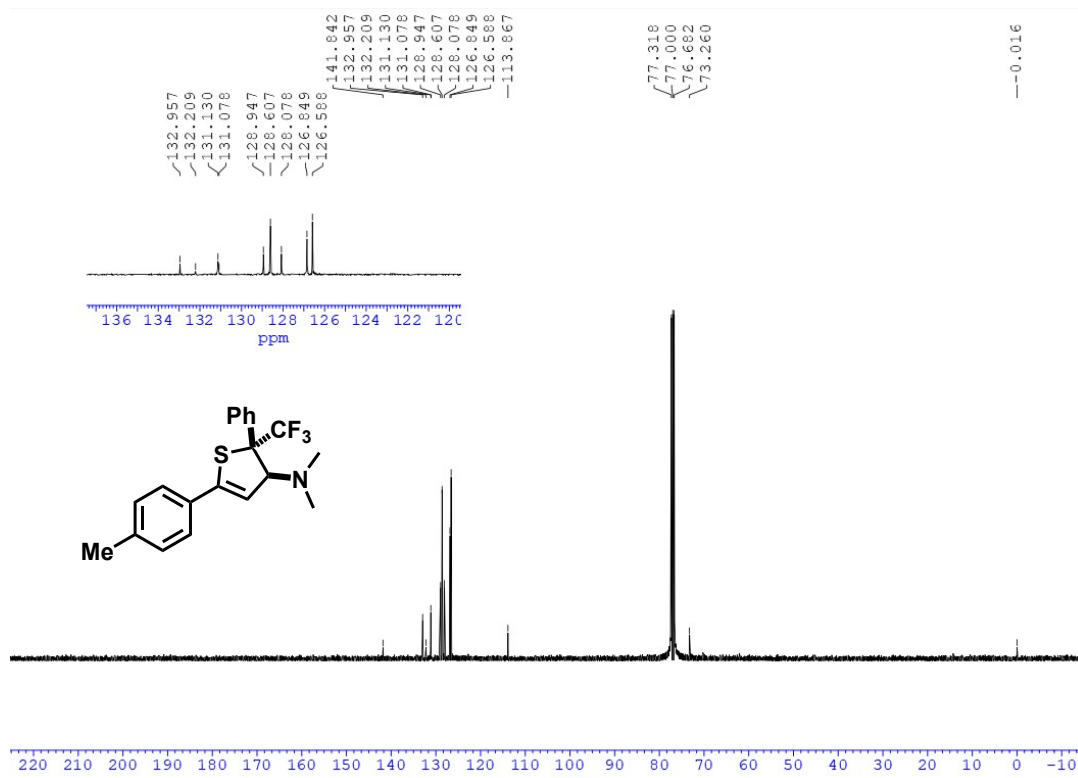

### <sup>1</sup>H NMR spectra of **3ac**

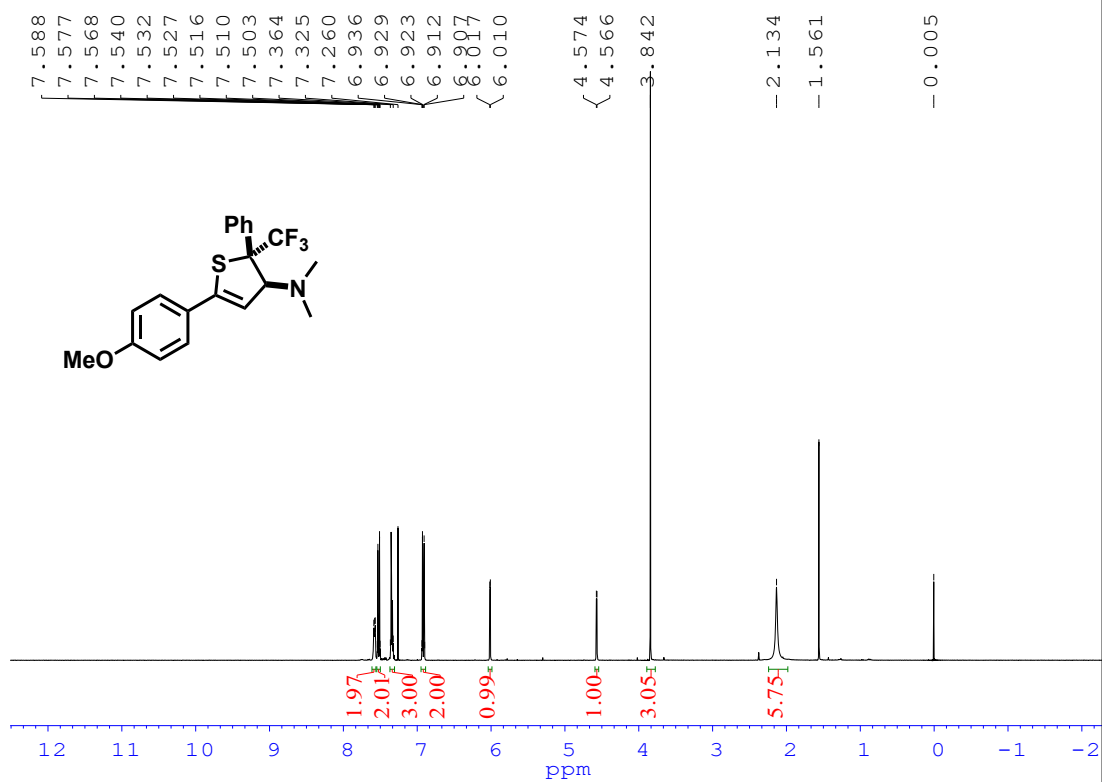

<sup>19</sup>F NMR spectra of **3ac**

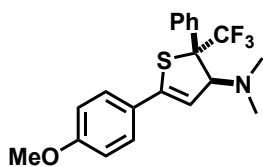

-75.121

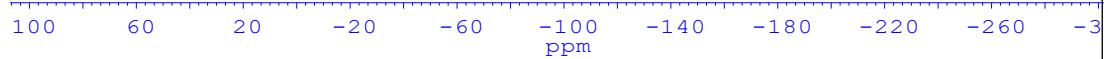

<sup>13</sup>C NMR spectra of **3ac**

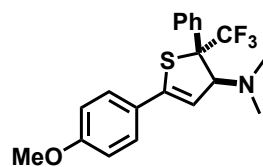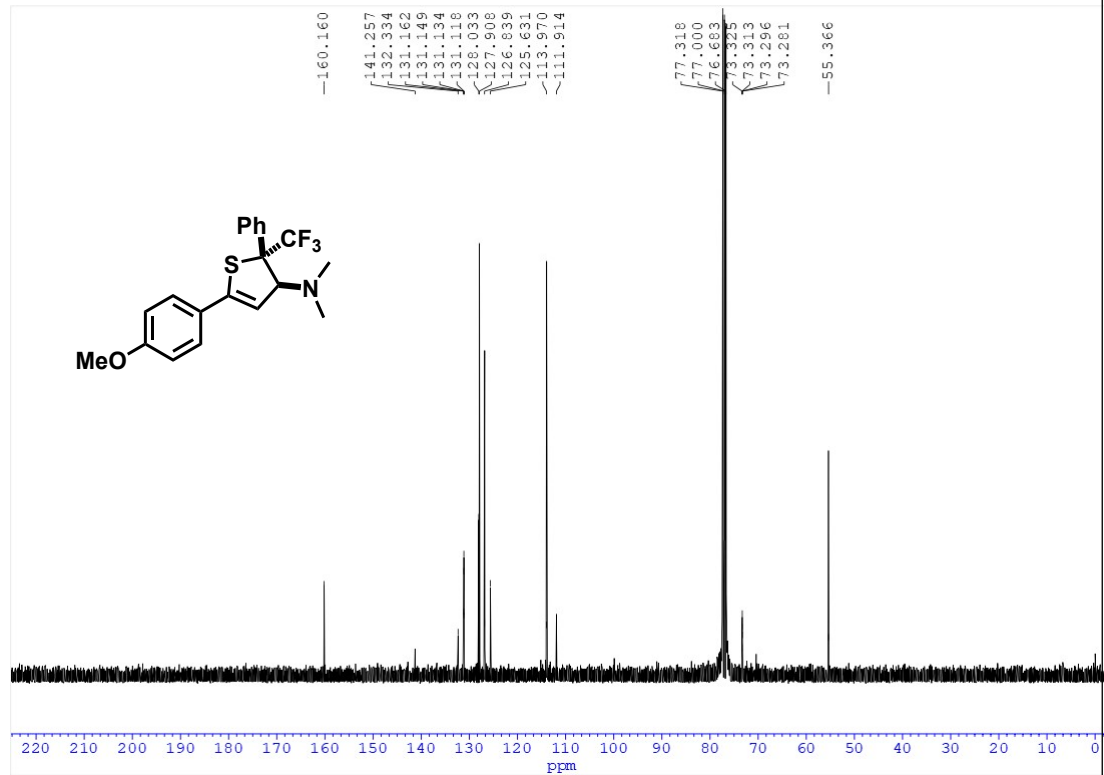



<sup>1</sup>H NMR spectra of **3ad**

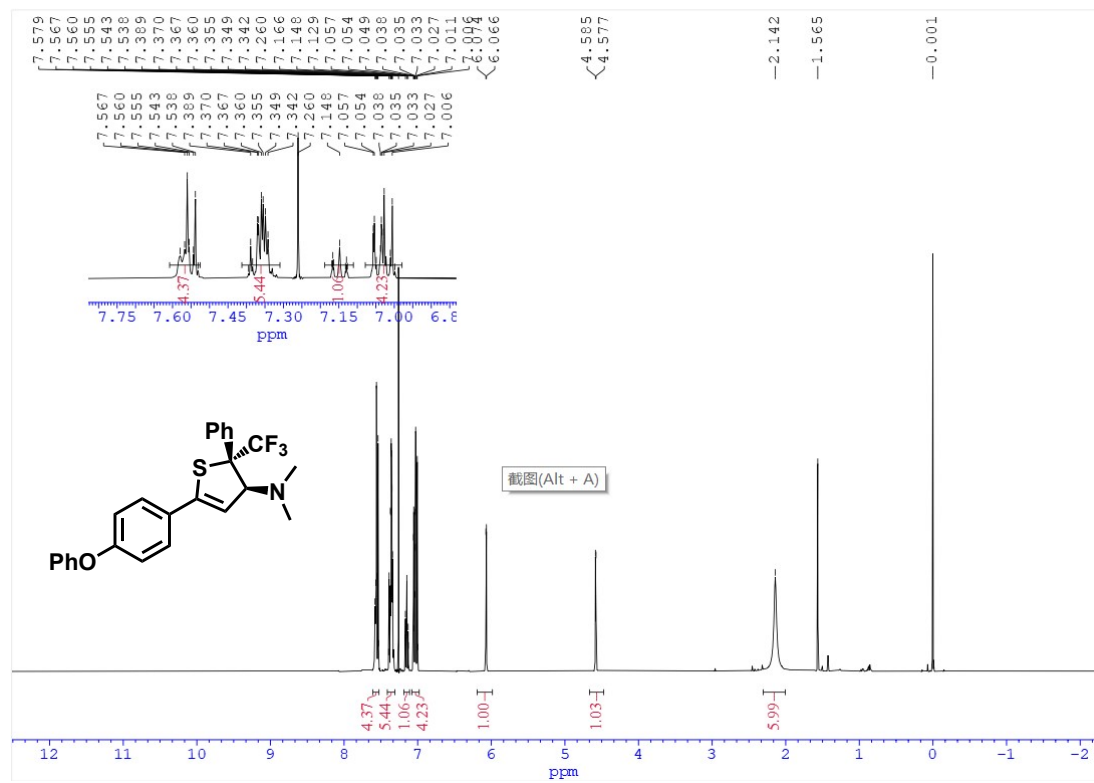

<sup>19</sup>F NMR spectra of **3ad**

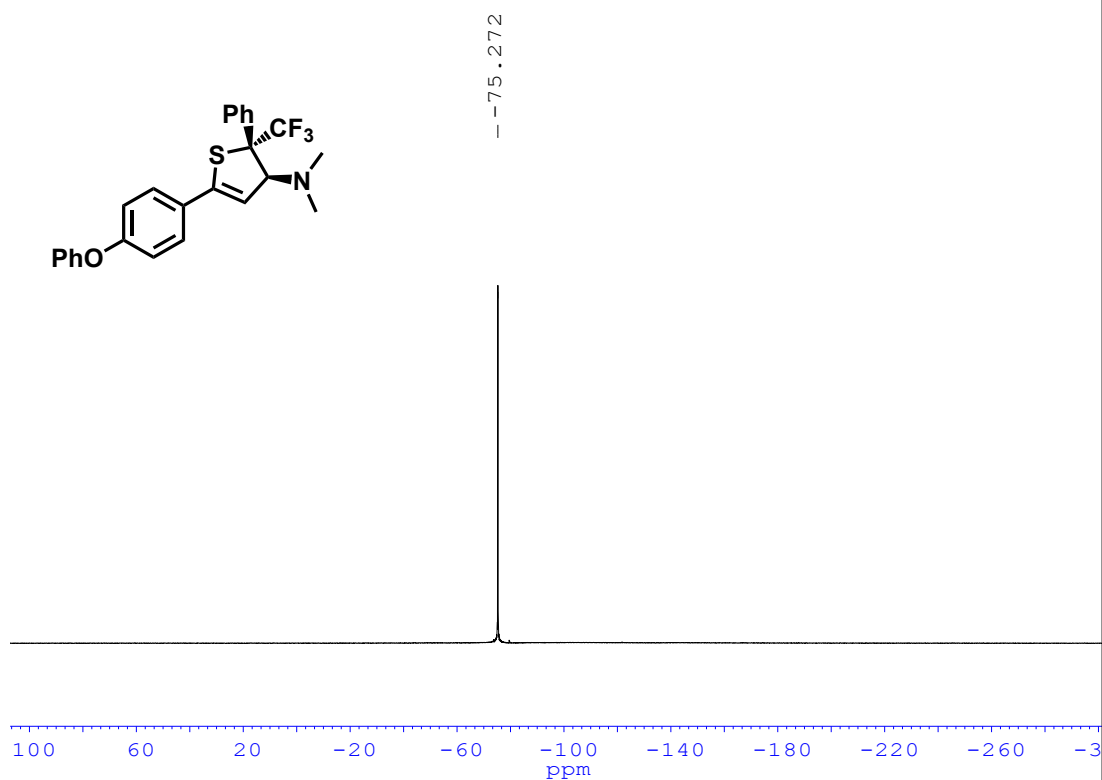

<sup>13</sup>C NMR spectra of **3ad**

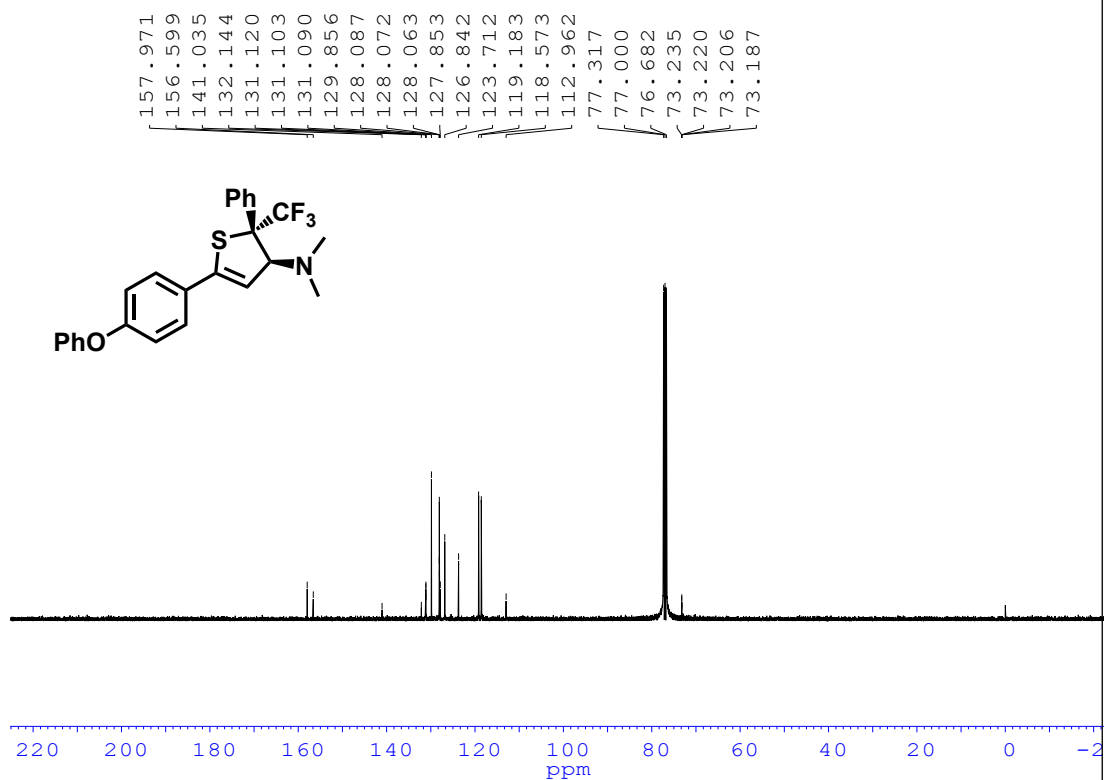

<sup>1</sup>H NMR spectra of **3ae**

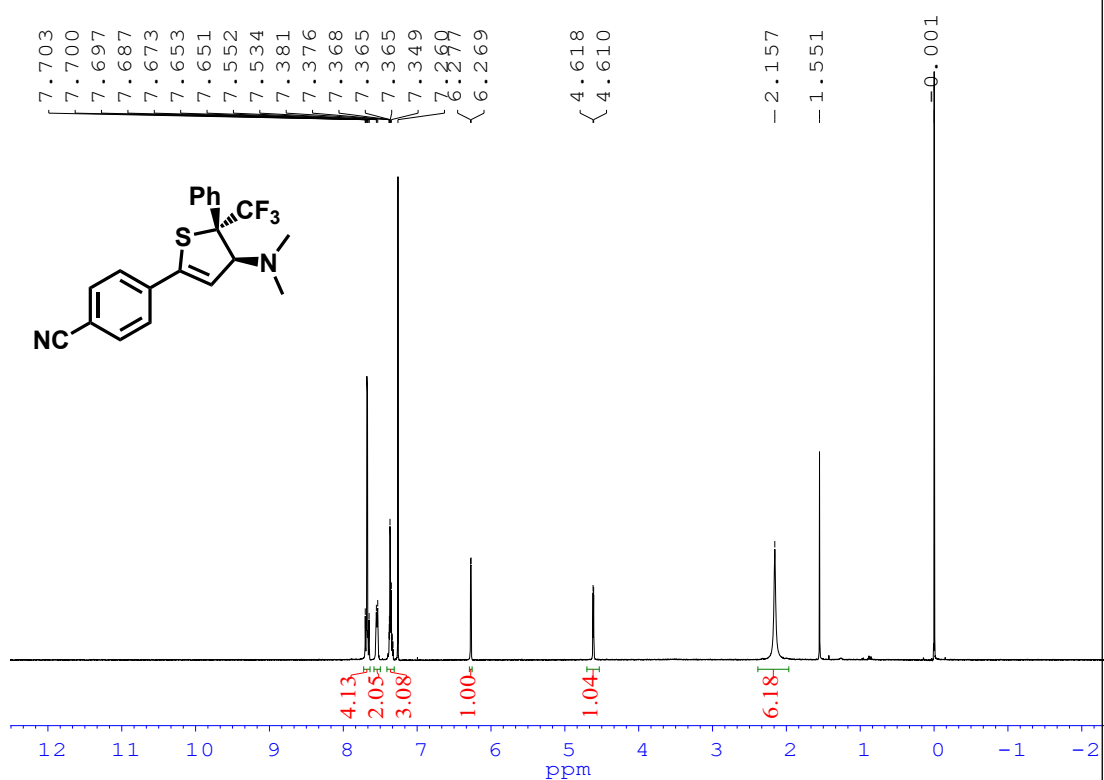

<sup>19</sup>F NMR spectra of **3ae**

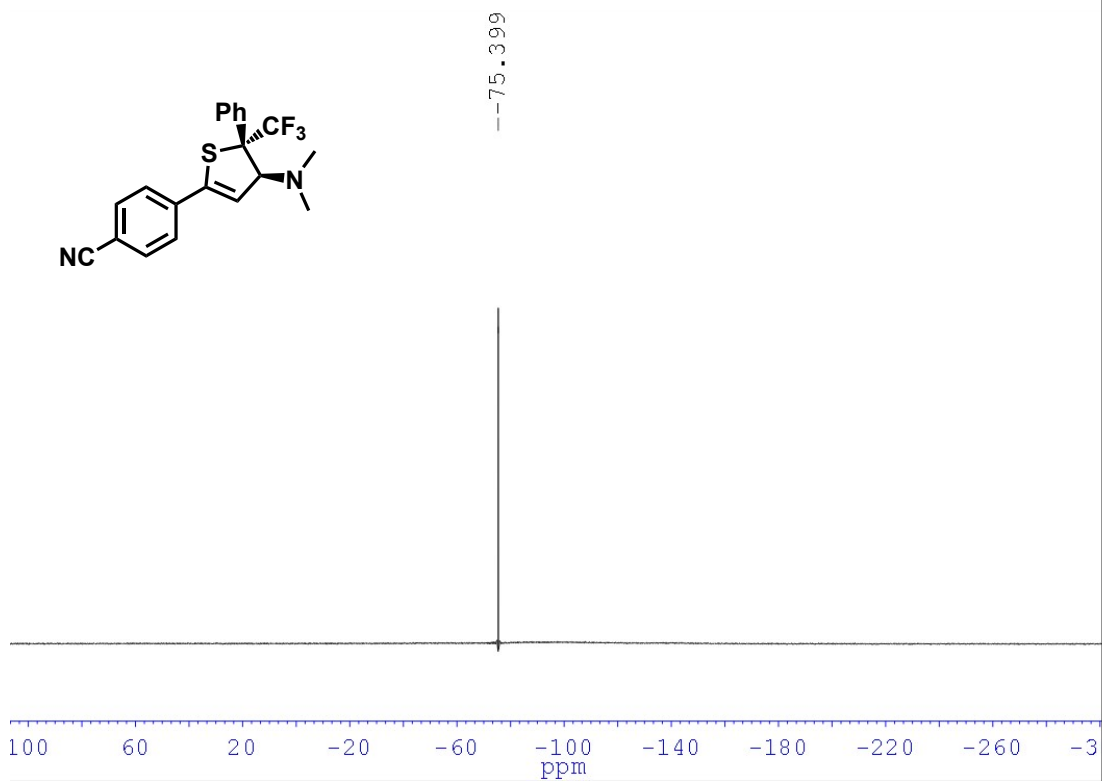

<sup>13</sup>C NMR spectra of **3ae**

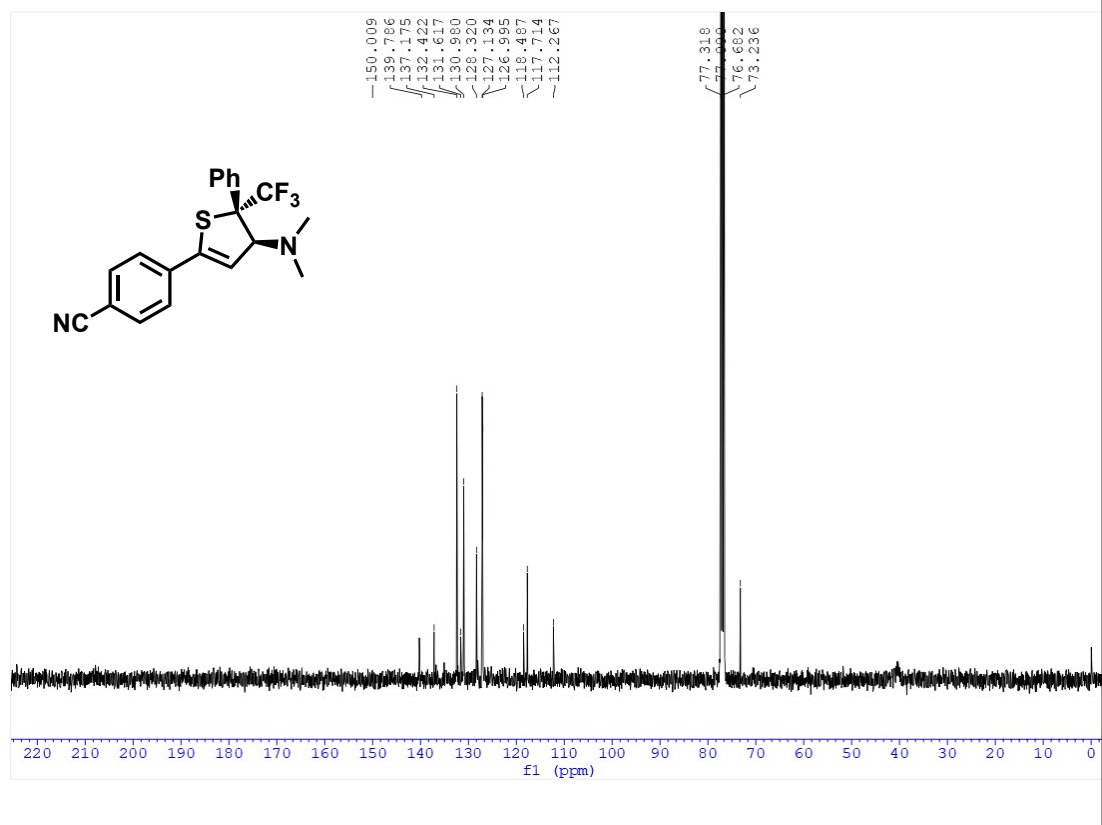

<sup>1</sup>H NMR spectra of **3af**

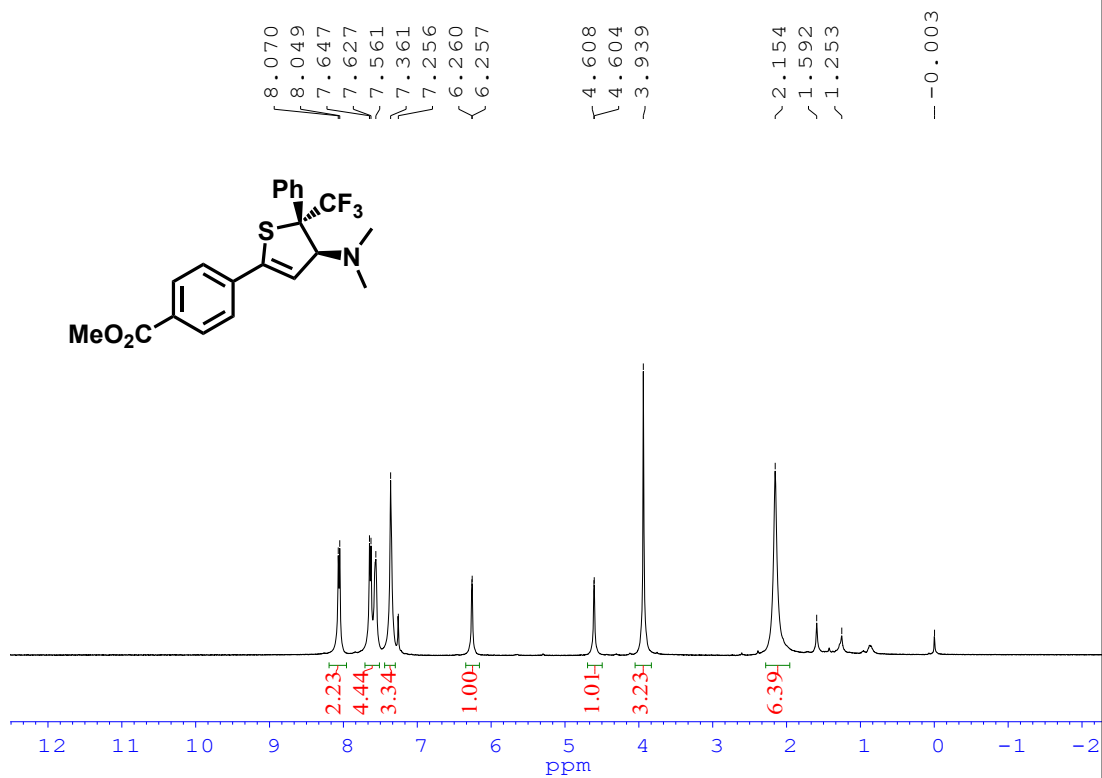

<sup>19</sup>F NMR spectra of **3af**

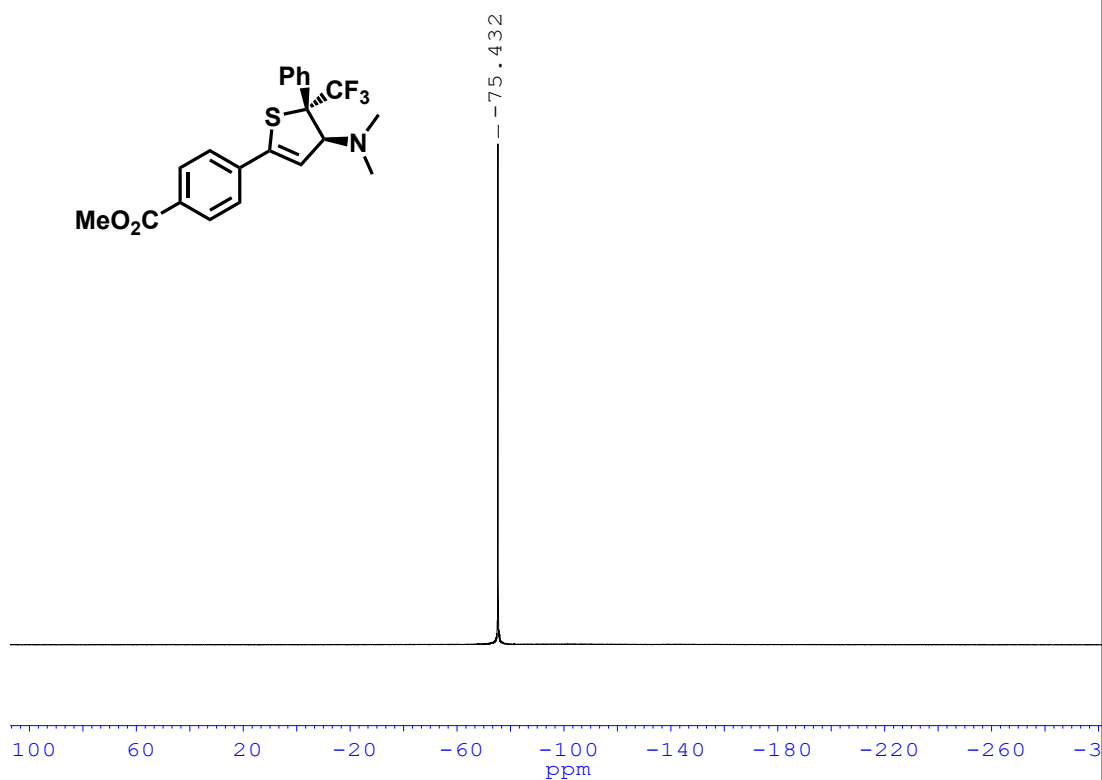

### <sup>13</sup>C NMR spectra of **3af**

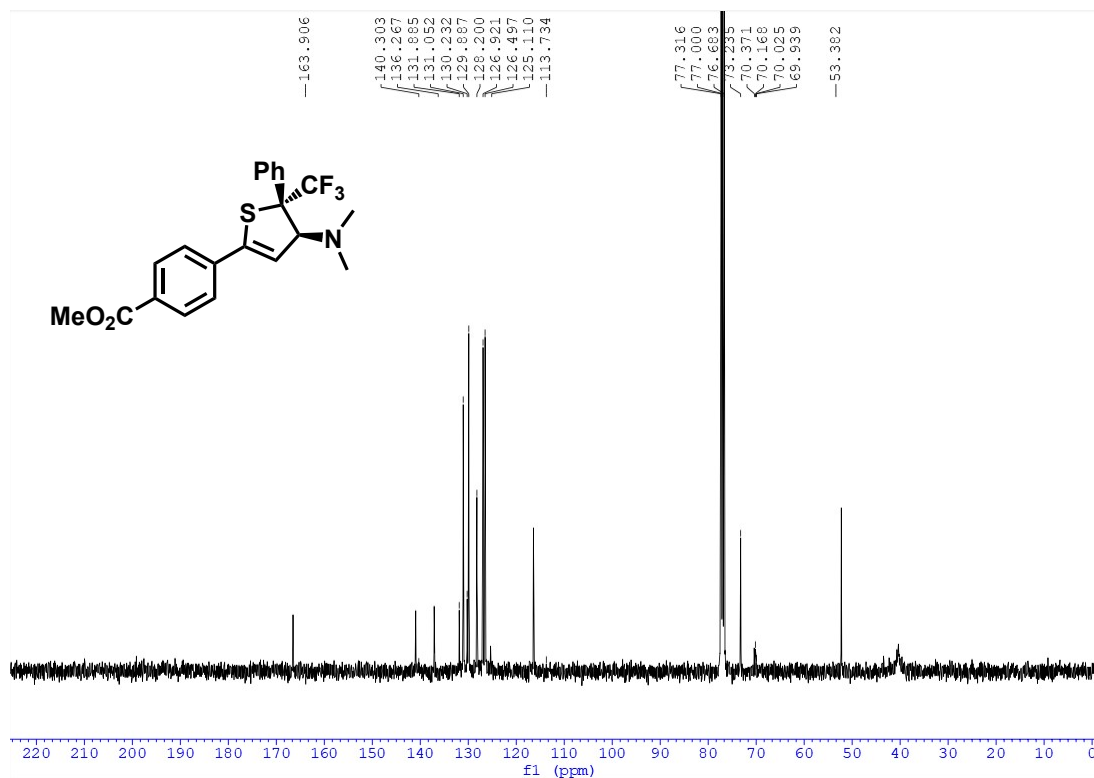

### <sup>1</sup>H NMR spectra of **3ag**

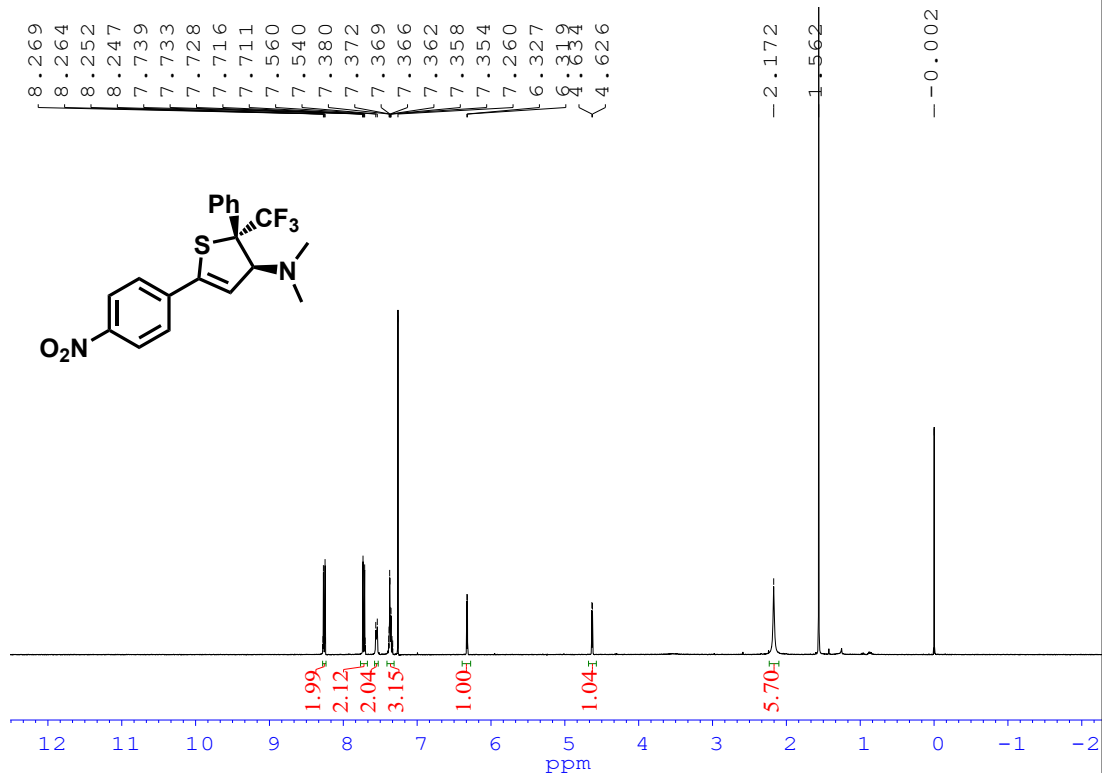

<sup>19</sup>F NMR spectra of **3ag**

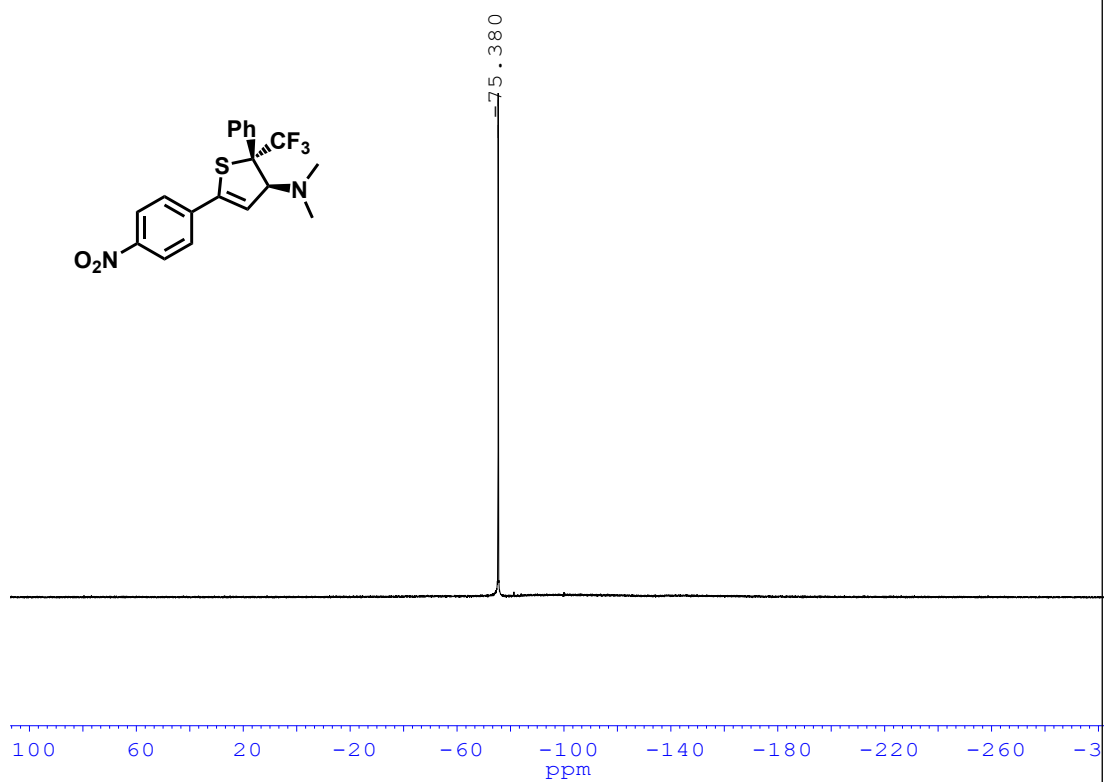

<sup>13</sup>C NMR spectra of **3ag**

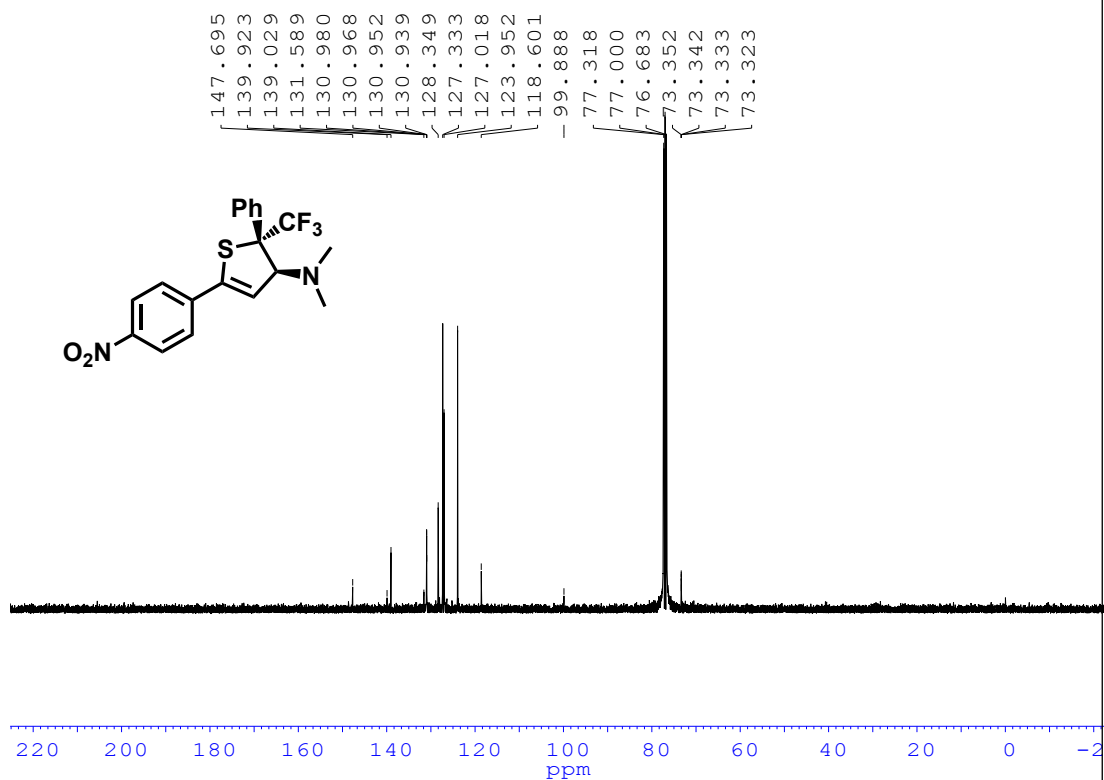

<sup>1</sup>H NMR spectra of **3ah**

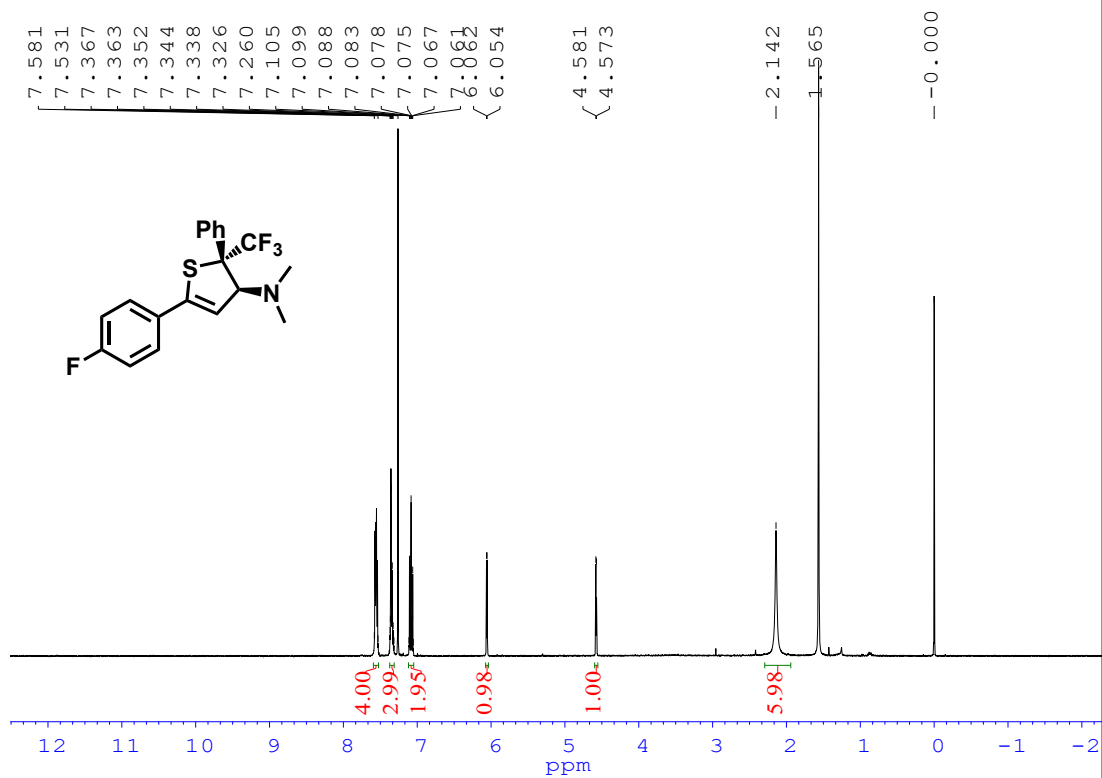

<sup>19</sup>F NMR spectra of **3ah**

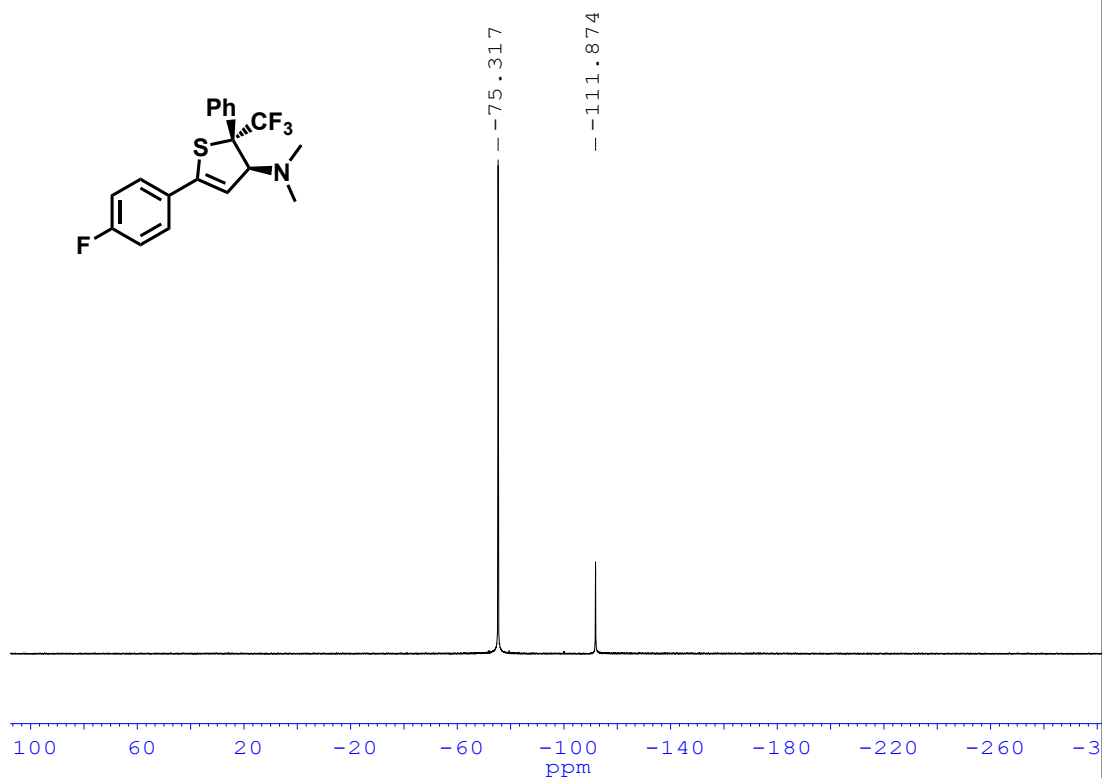

### $^{13}\text{C}$ NMR spectra of **3ah**

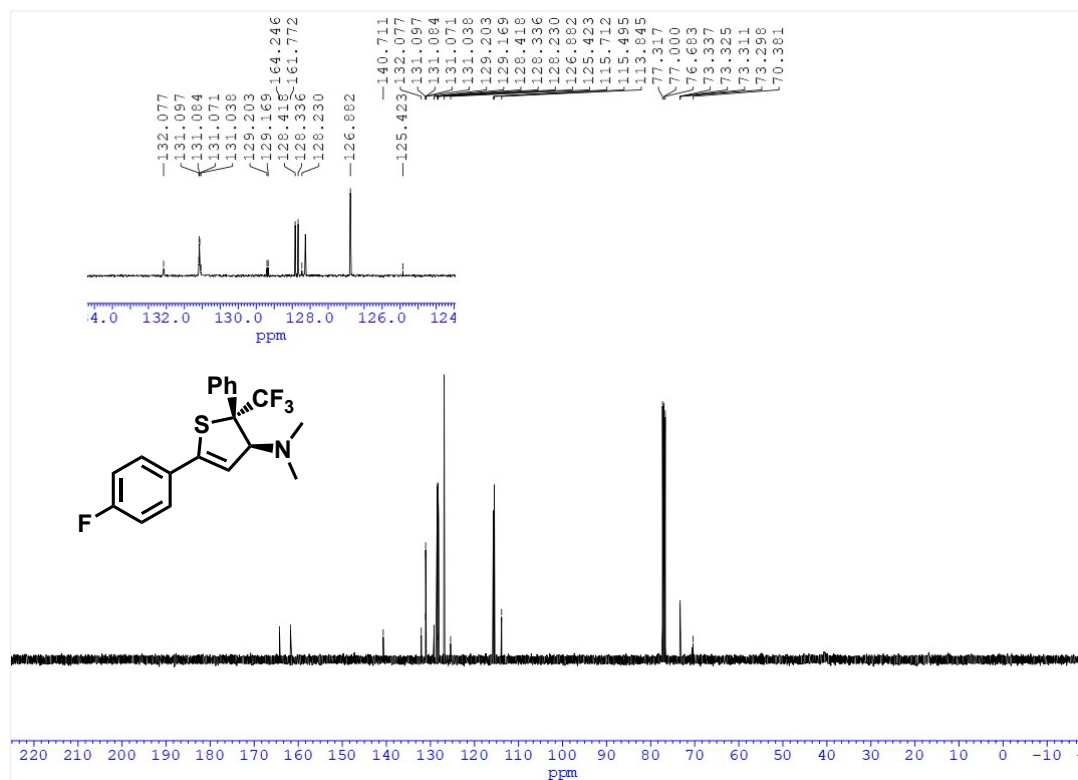

### $^1\text{H}$ NMR spectra of **3ai**

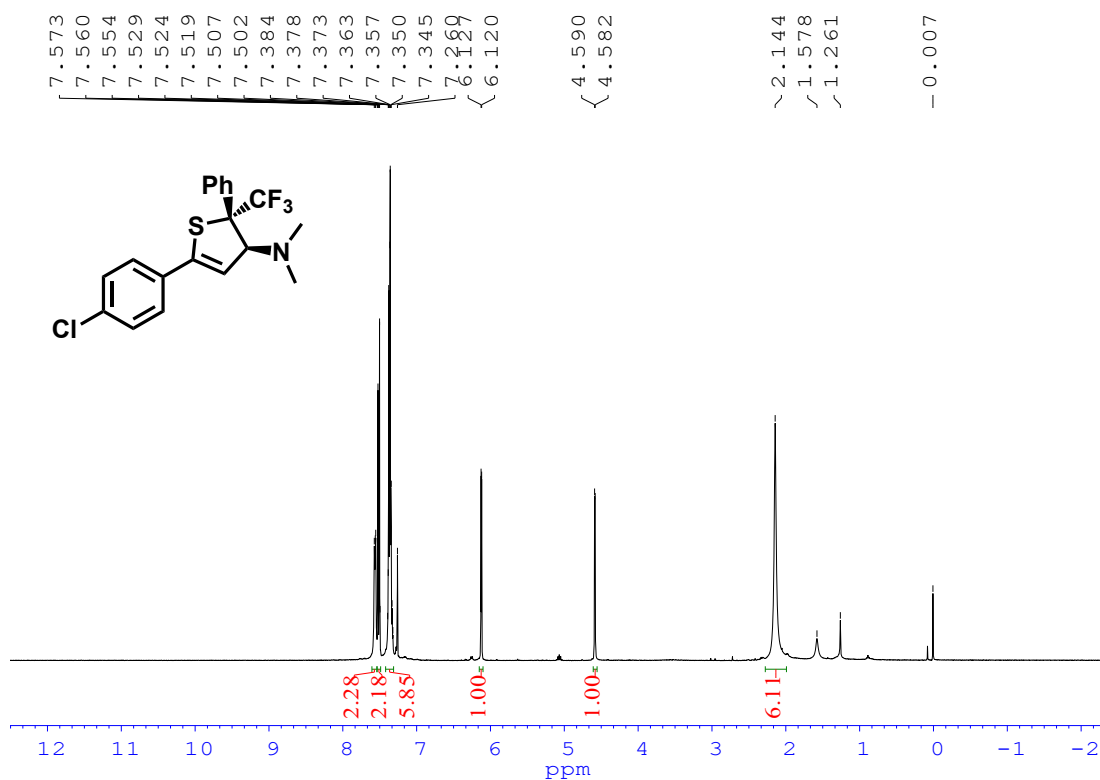



<sup>19</sup>F NMR spectra of **3ai**

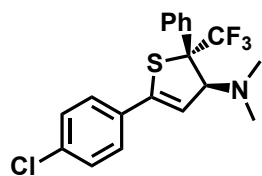

--75.337

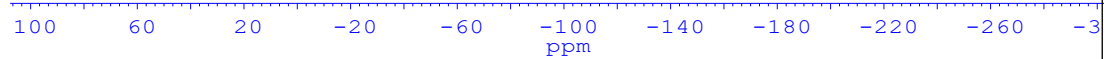

<sup>13</sup>C NMR spectra of **3ai**

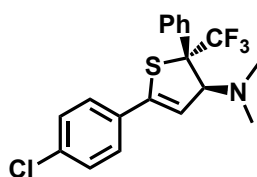

140.696  
134.765  
131.430  
131.083  
131.069  
131.054  
131.040  
128.788  
128.163  
127.837  
126.900  
114.648

77.319  
77.000  
76.683  
73.322  
73.314  
73.303  
73.289

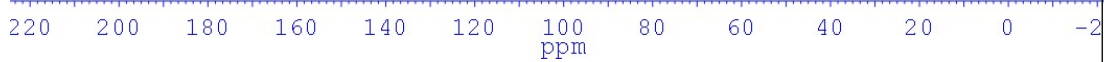

### $^1\text{H}$ NMR spectra of **3aj**

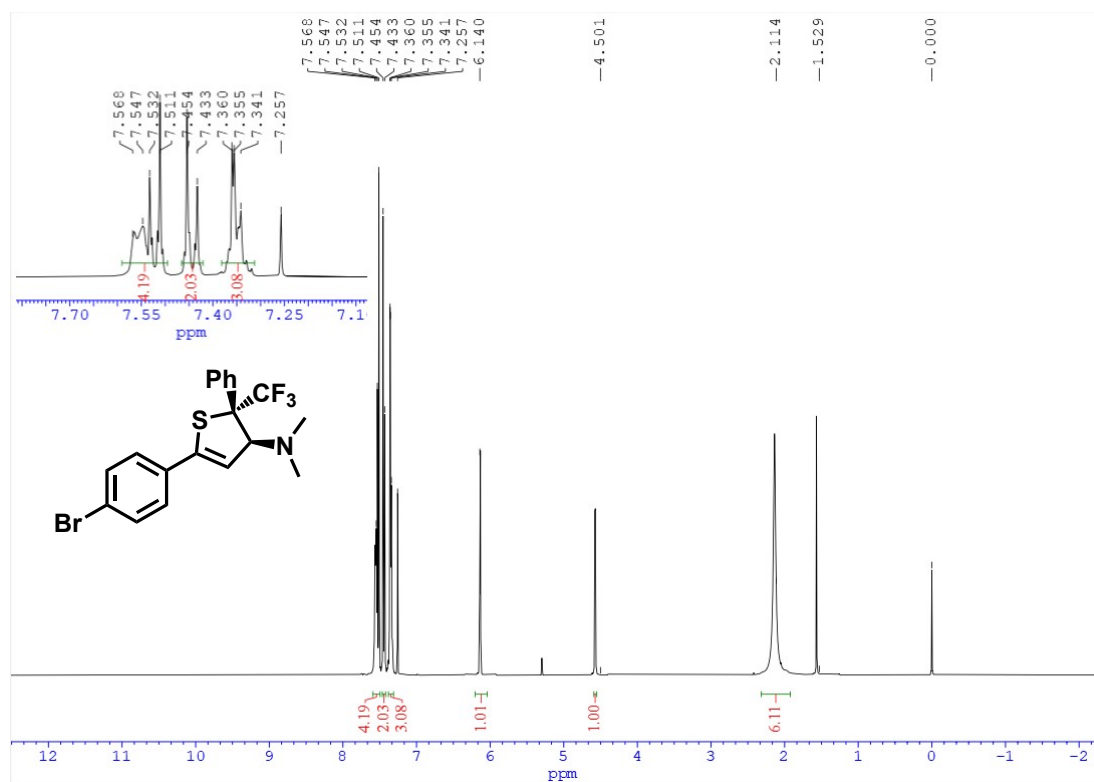

### $^{19}\text{F}$ NMR spectra of **3aj**

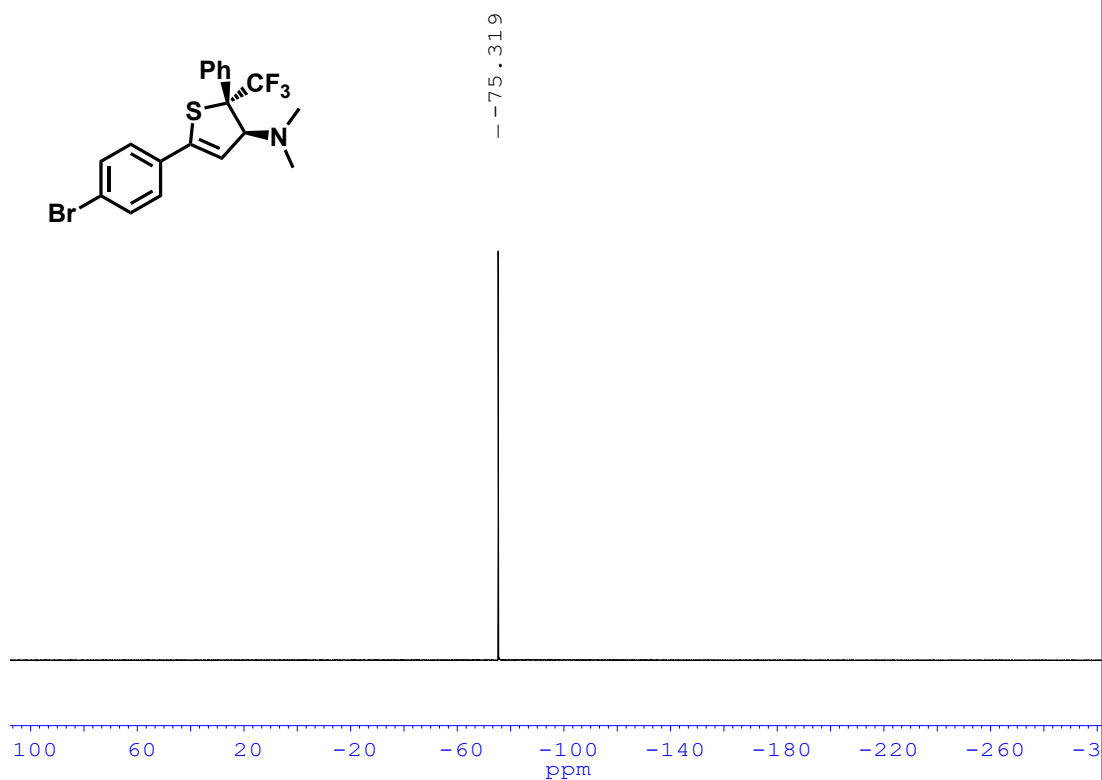

<sup>13</sup>C NMR spectra of **3aj**

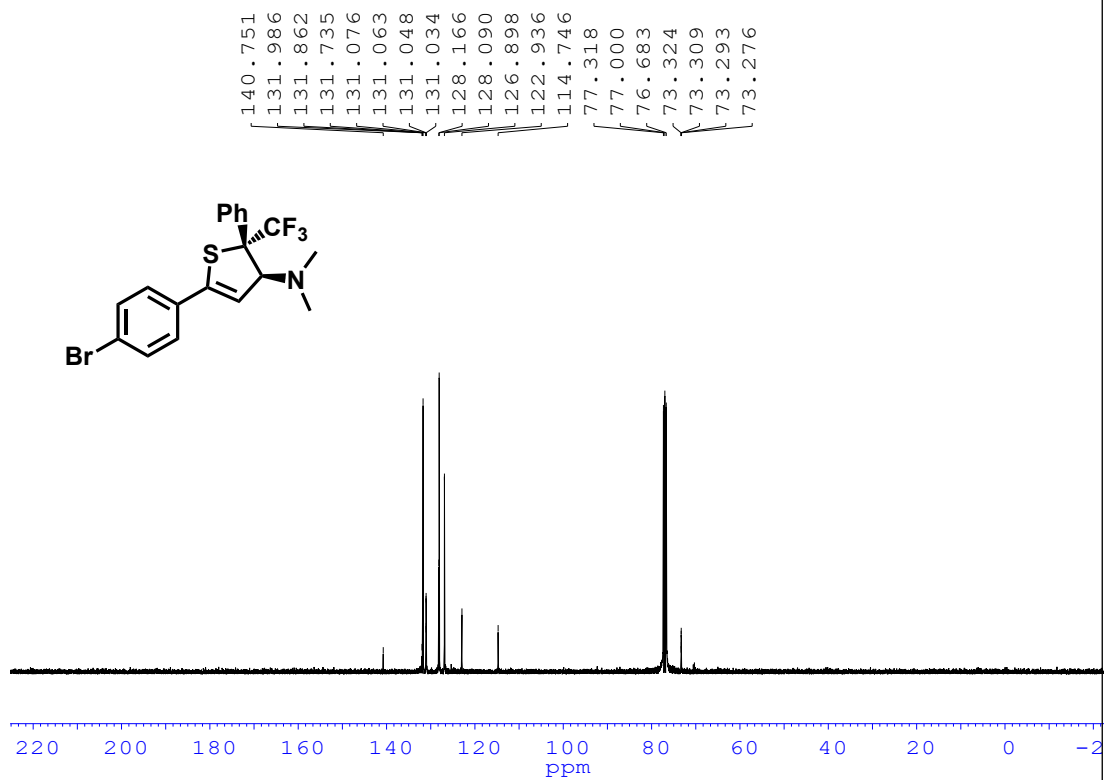

<sup>1</sup>H NMR spectra of **3ak**

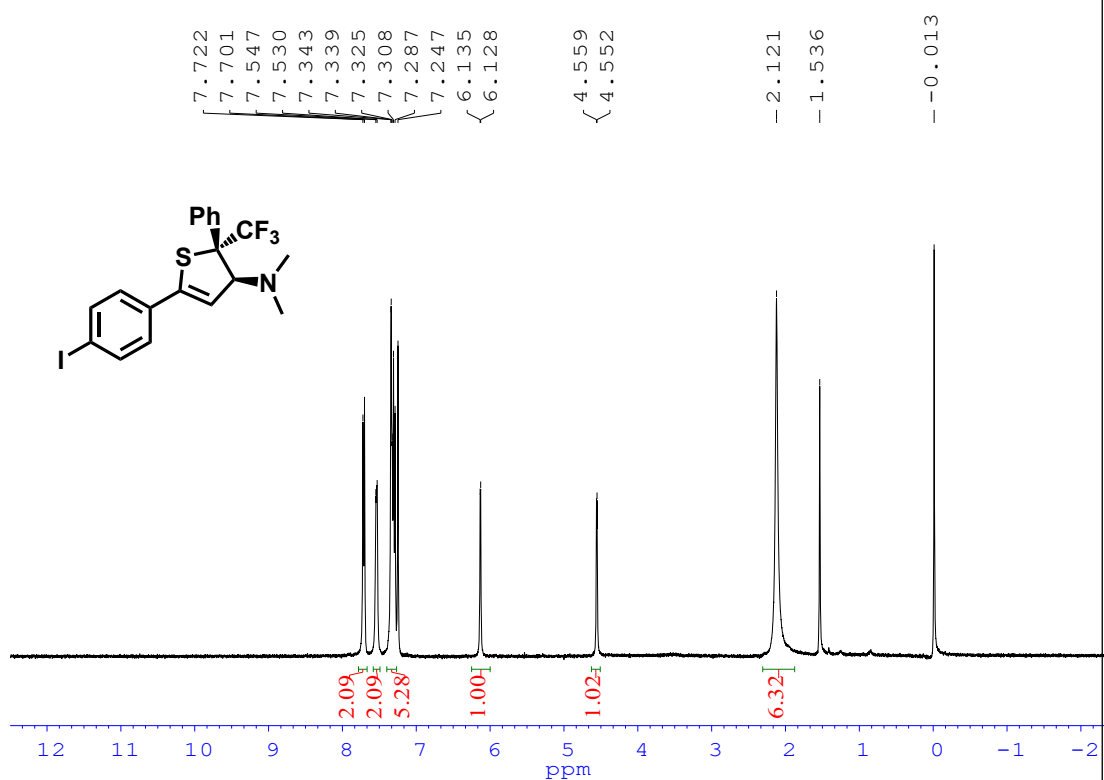

<sup>19</sup>F NMR spectra of **3ak**

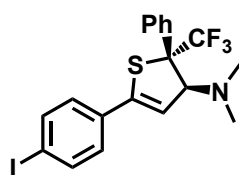

-75.275



<sup>13</sup>C NMR spectra of **3ak**

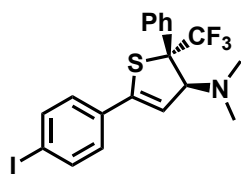

140.867  
137.675  
132.385  
131.930  
131.067  
131.056  
131.041  
131.034  
128.209  
128.160  
126.890  
-114.777  
-99.882  
-94.582  
77.319  
77.000  
76.681  
73.242  
73.231  
73.216  
73.208

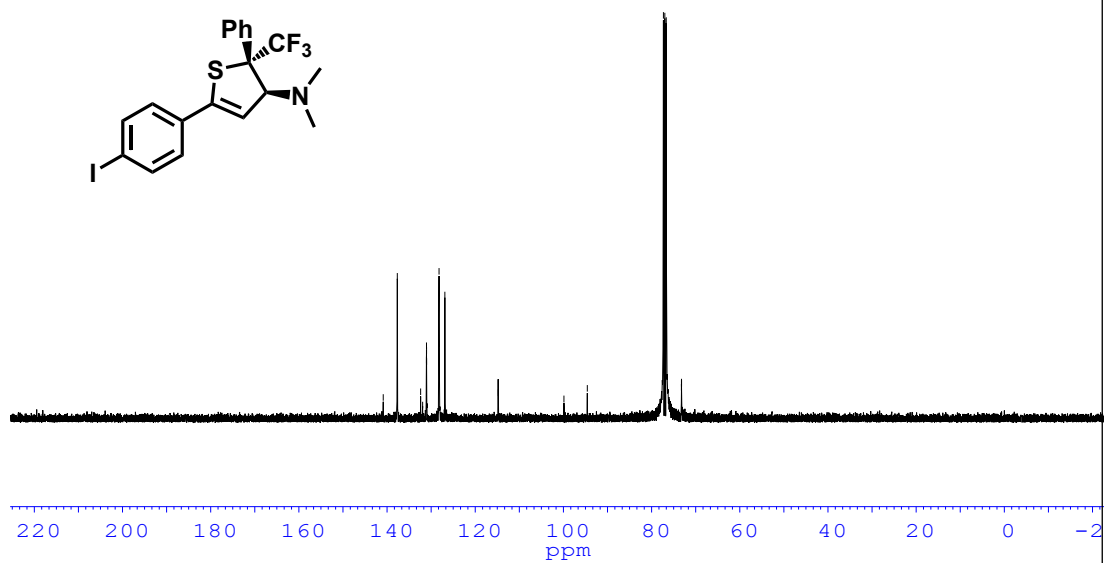

<sup>1</sup>H NMR spectra of **3al**

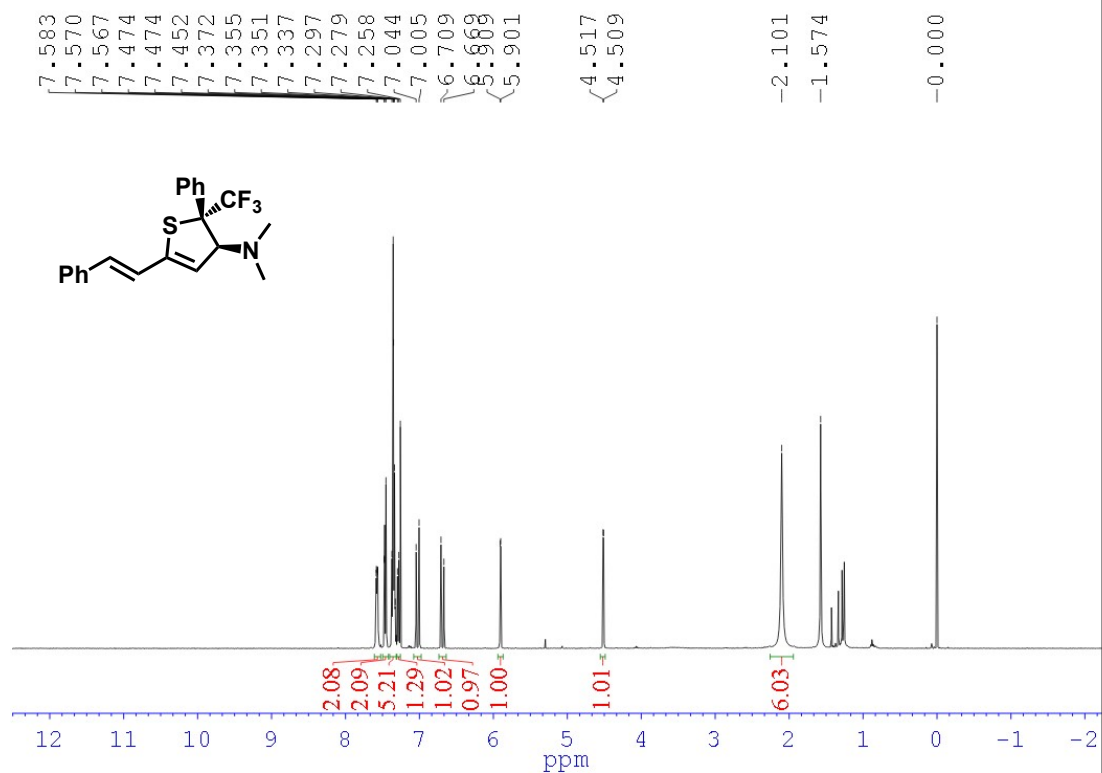

<sup>19</sup>F NMR spectra of **3al**

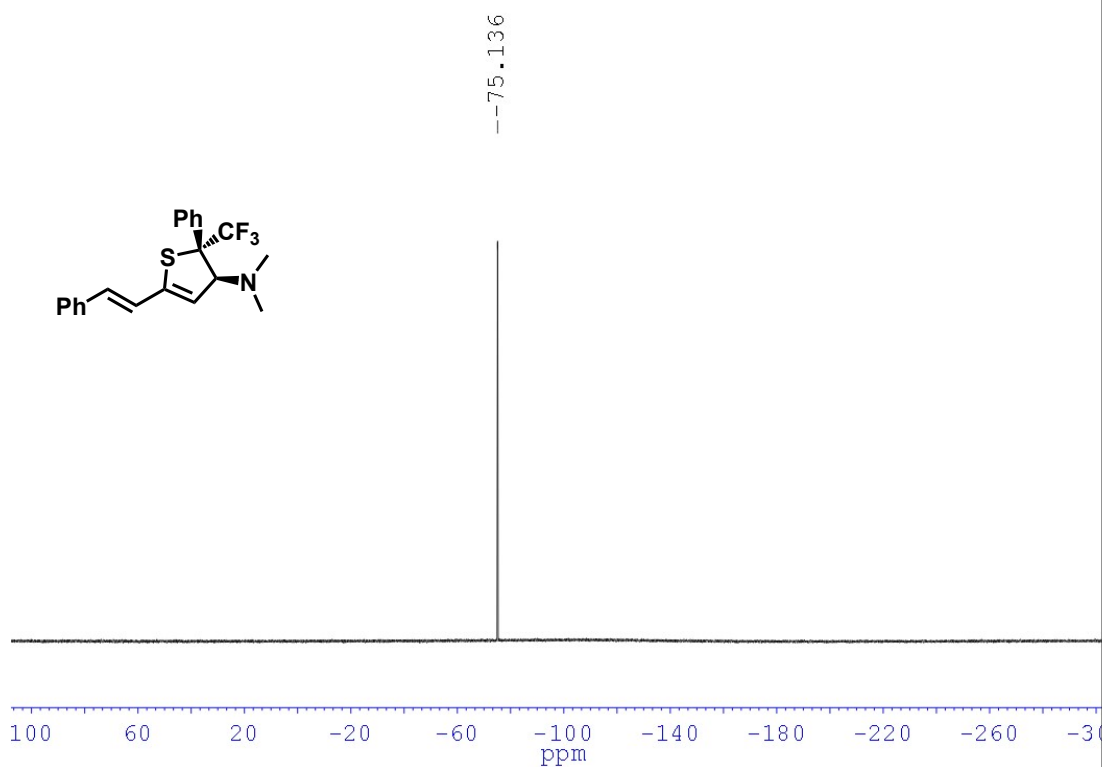

<sup>13</sup>C NMR spectra of **3al**

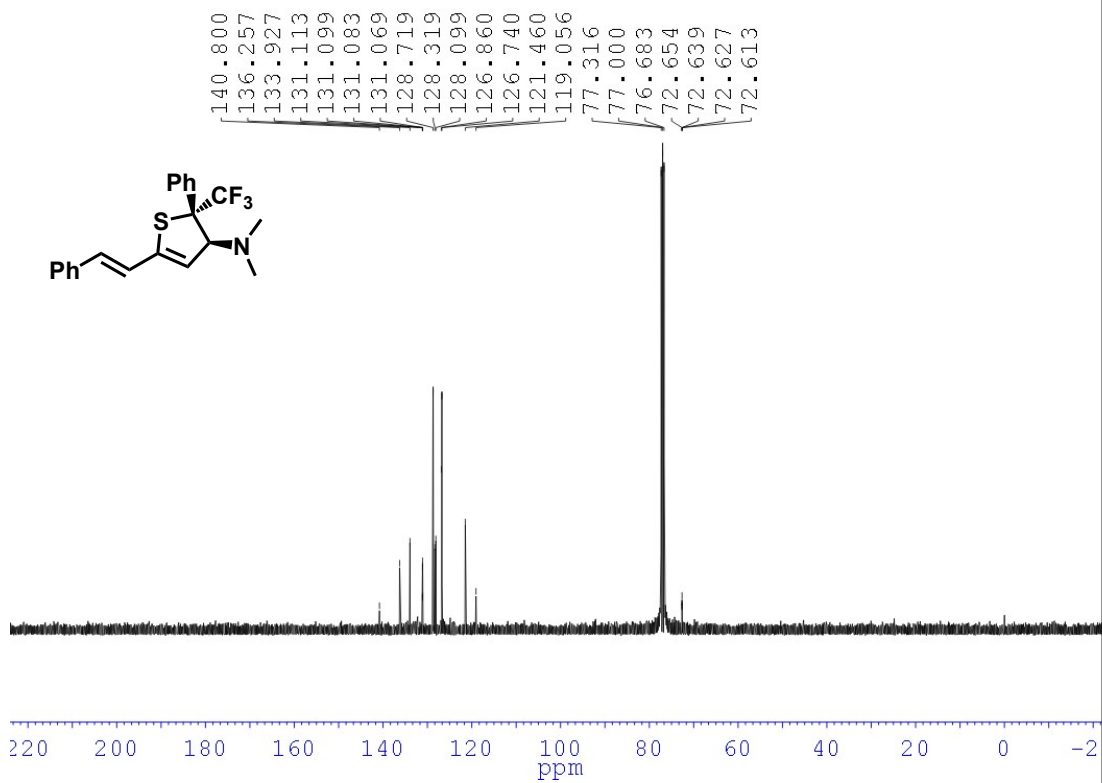

<sup>1</sup>H NMR spectra of **3am**

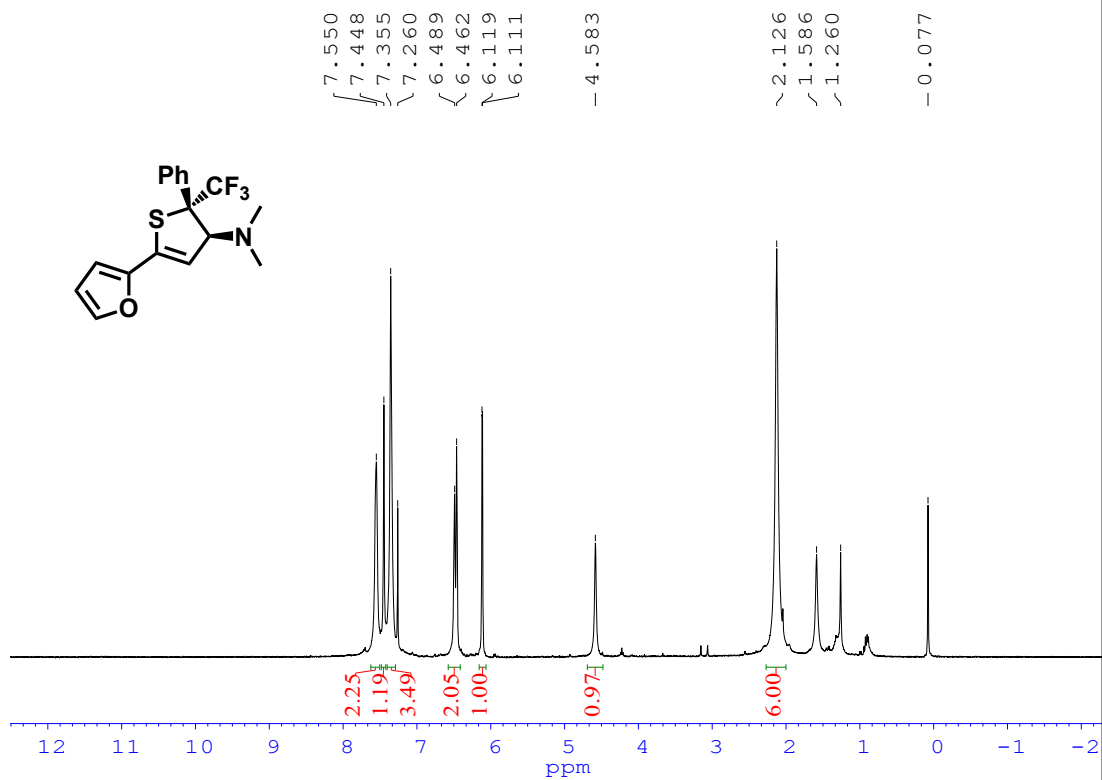

<sup>19</sup>F NMR spectra of **3am**

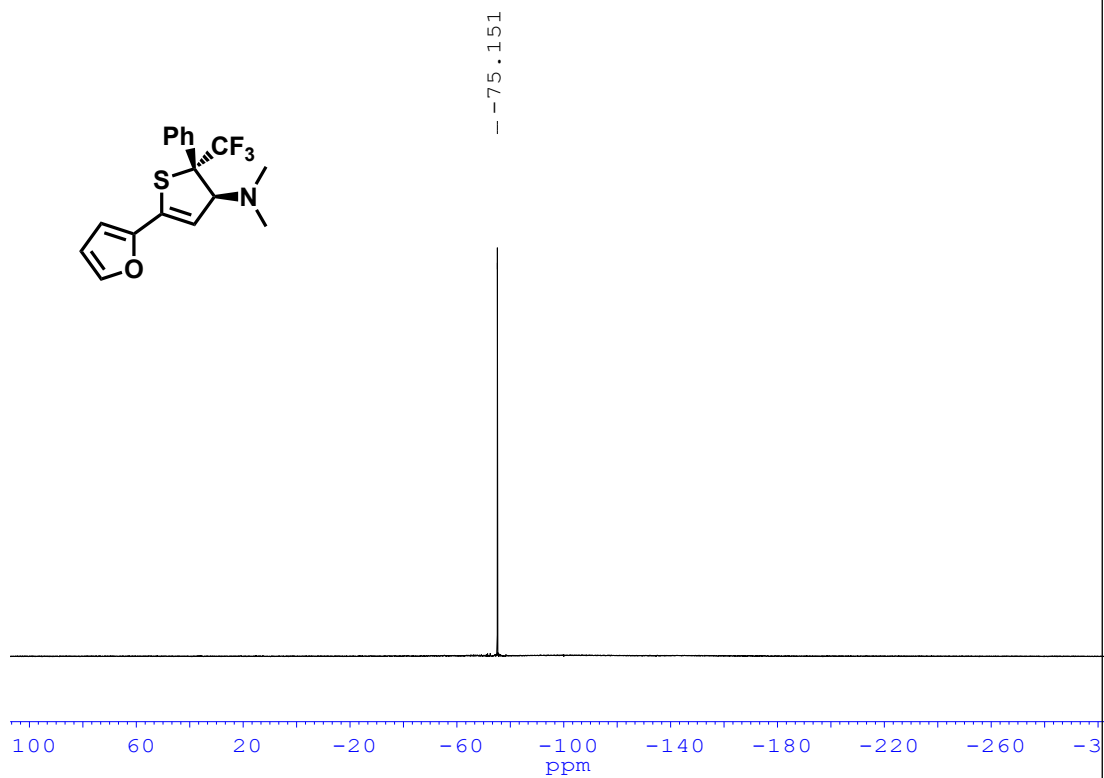

<sup>13</sup>C NMR spectra of **3am**

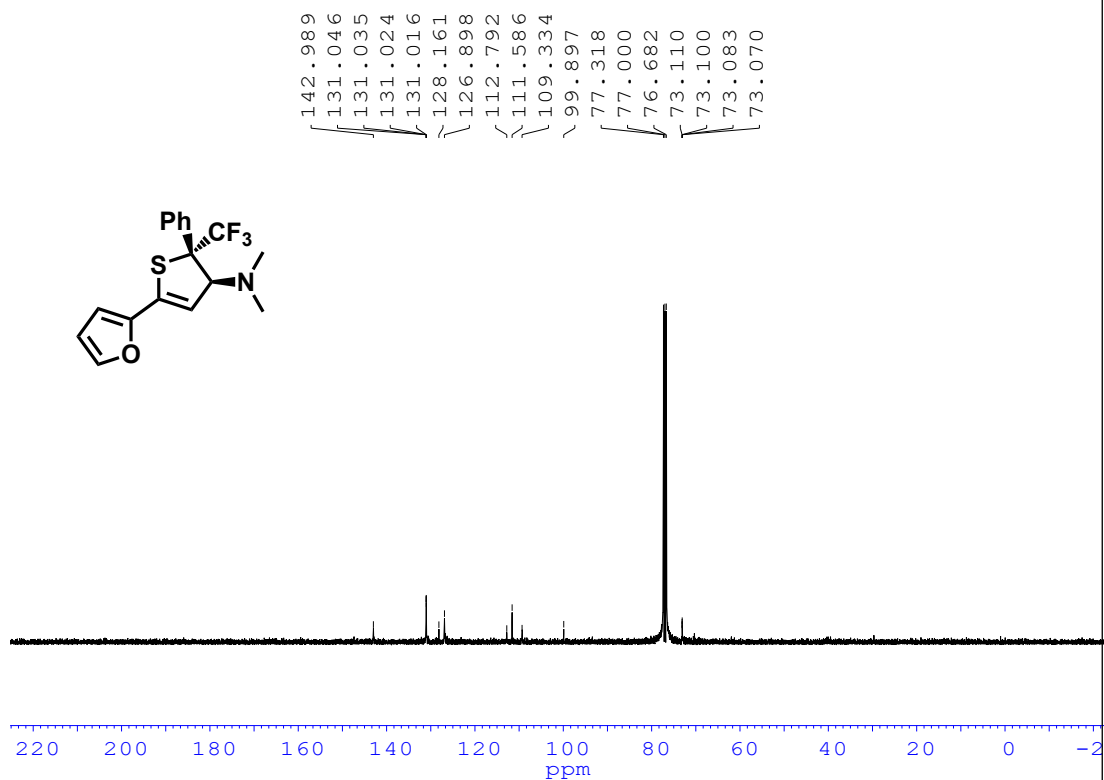

<sup>1</sup>H NMR spectra of **3an**

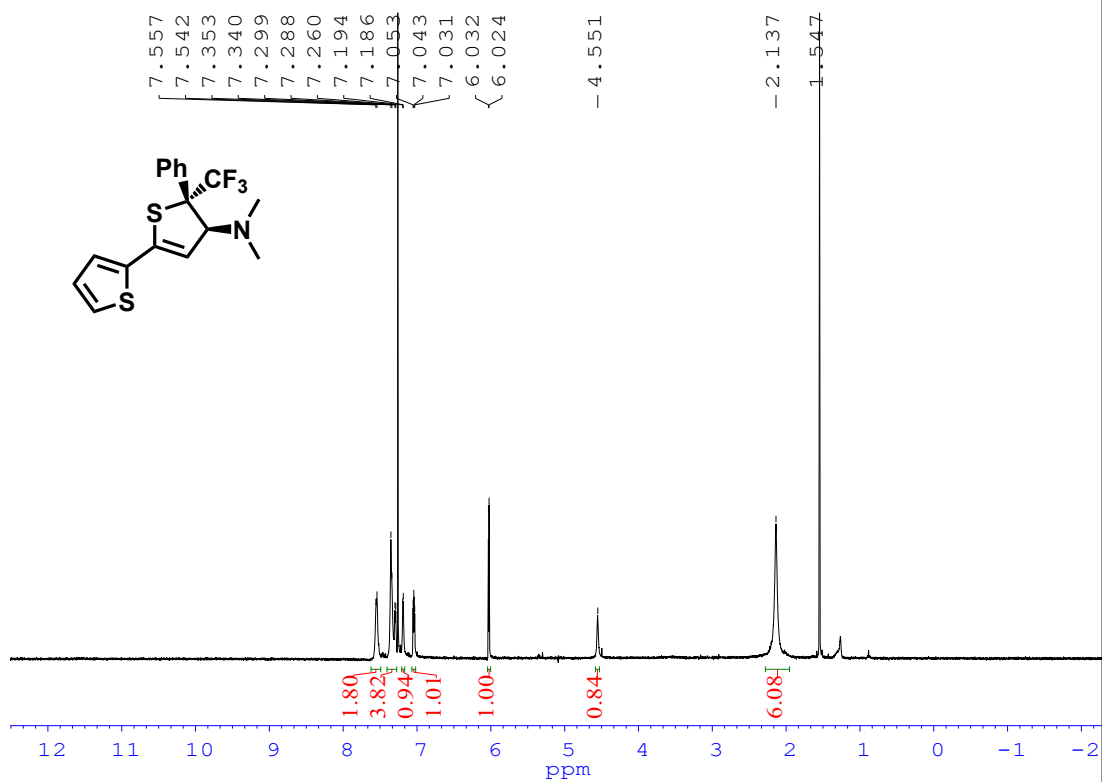

<sup>19</sup>F NMR spectra of **3an**

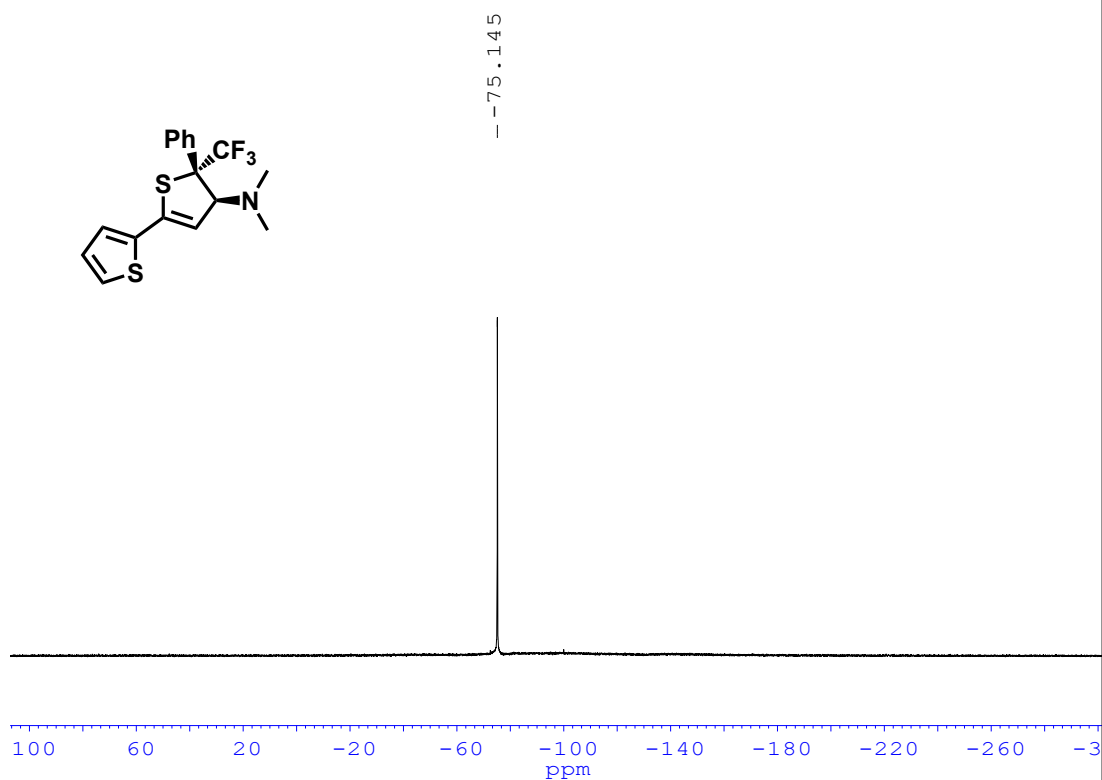



<sup>13</sup>C NMR spectra of **3an**

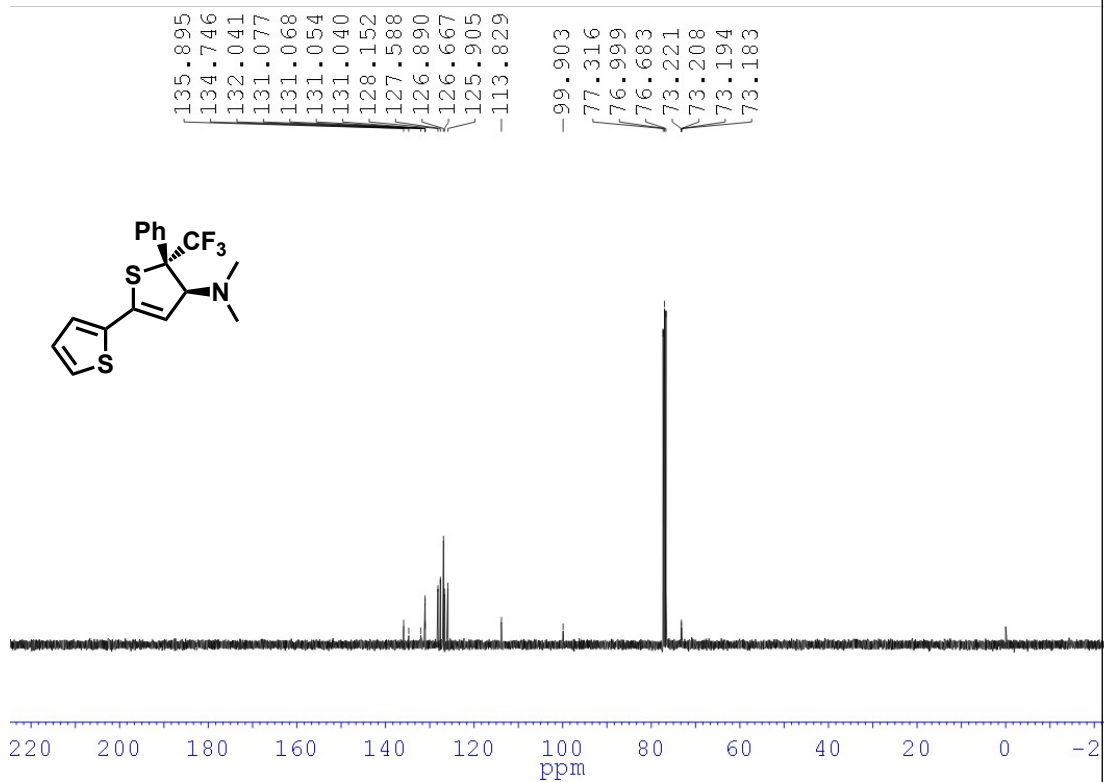

<sup>1</sup>H NMR spectra of **3ao**

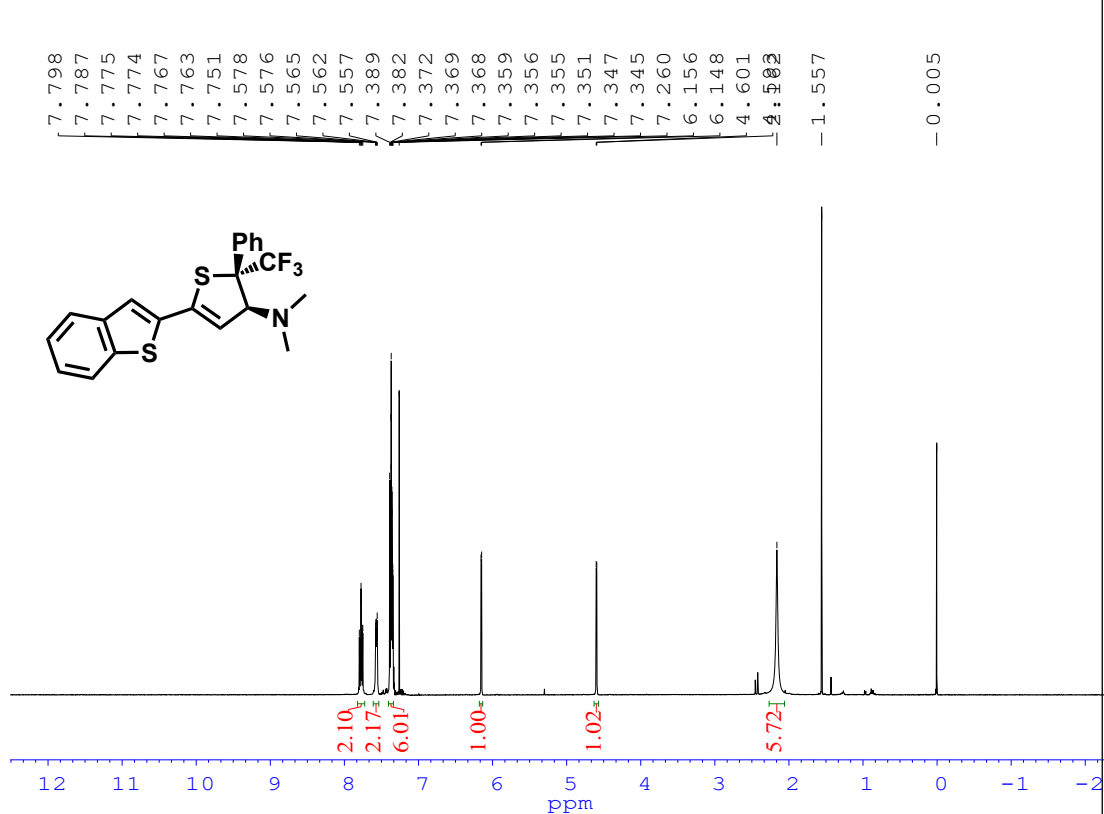

<sup>19</sup>F NMR spectra of **3ao**

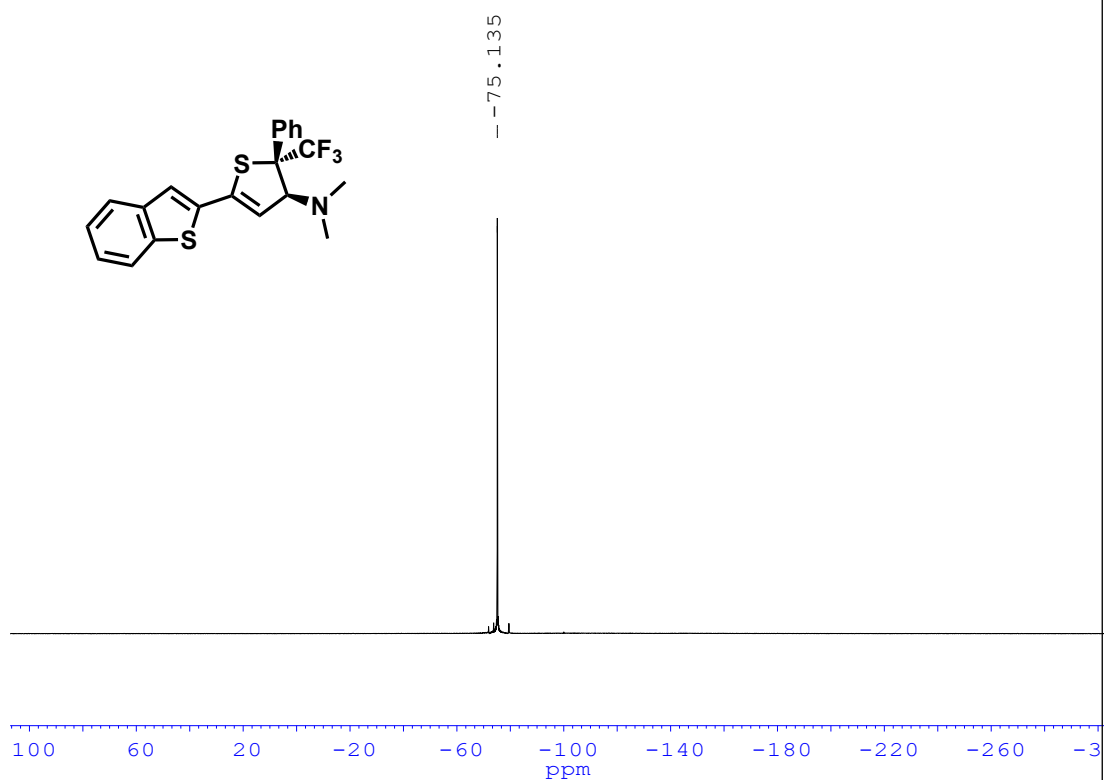

<sup>13</sup>C NMR spectra of **3ao**

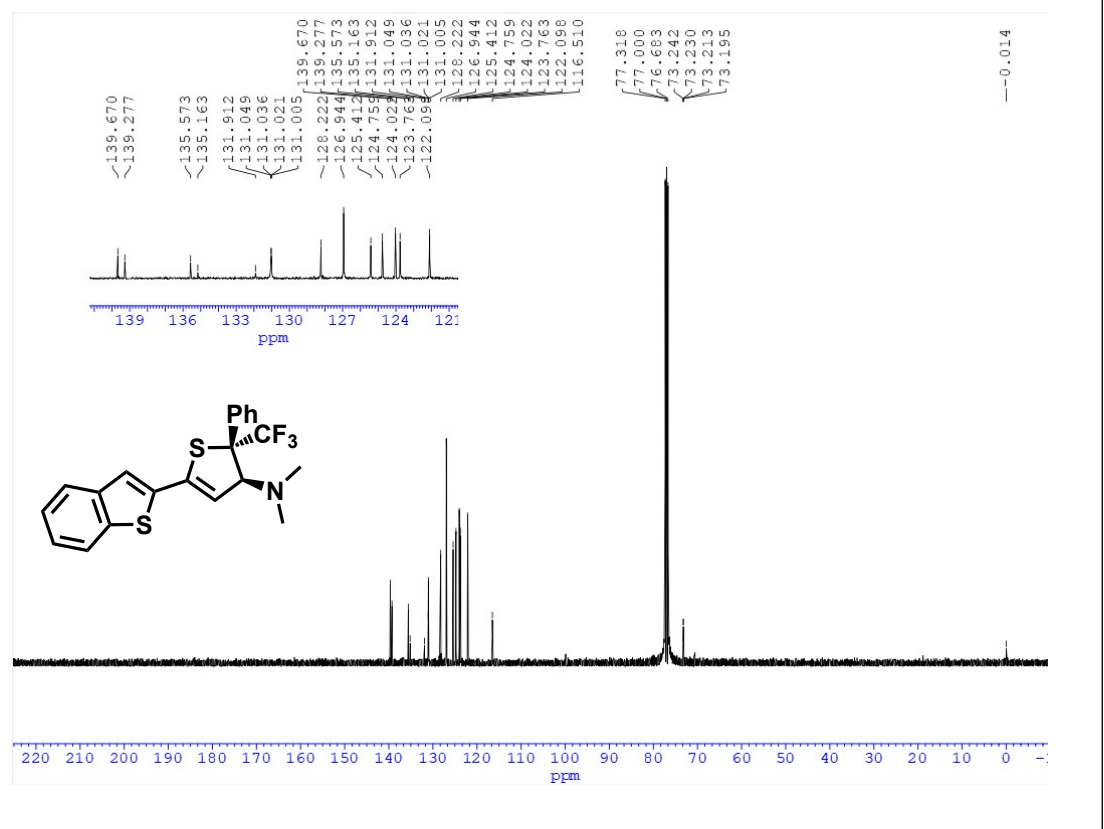

<sup>1</sup>H NMR spectra of **3ap**

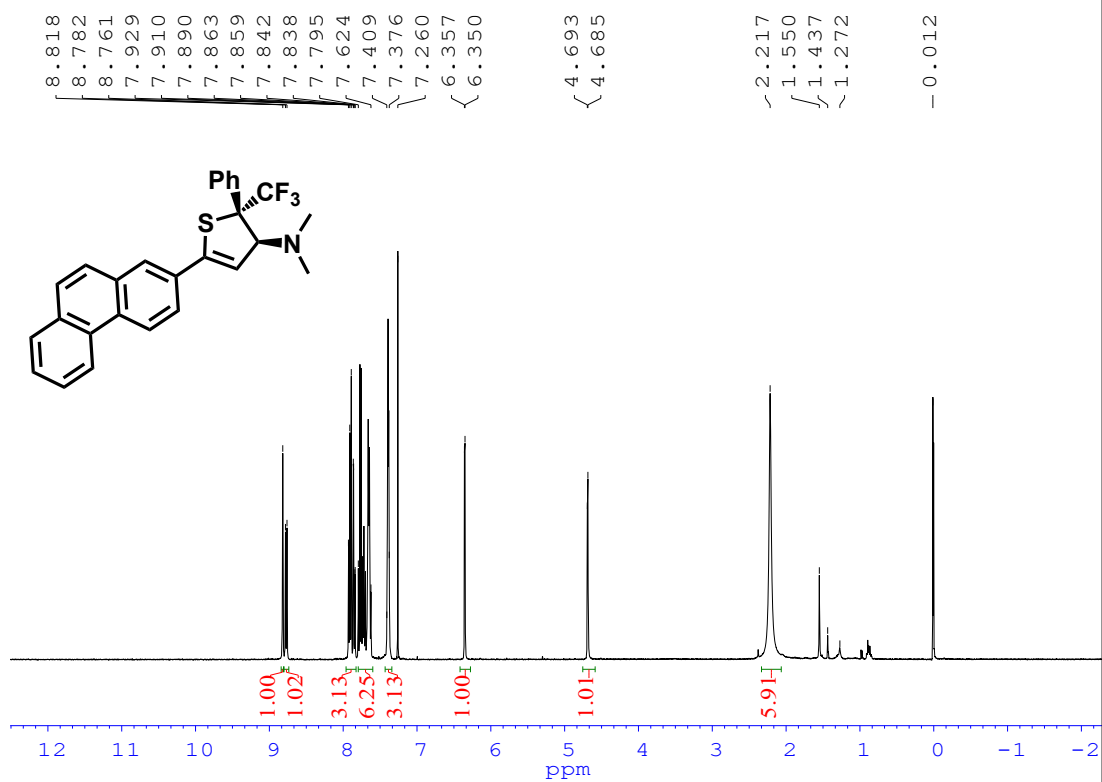

<sup>19</sup>F NMR spectra of **3ap**

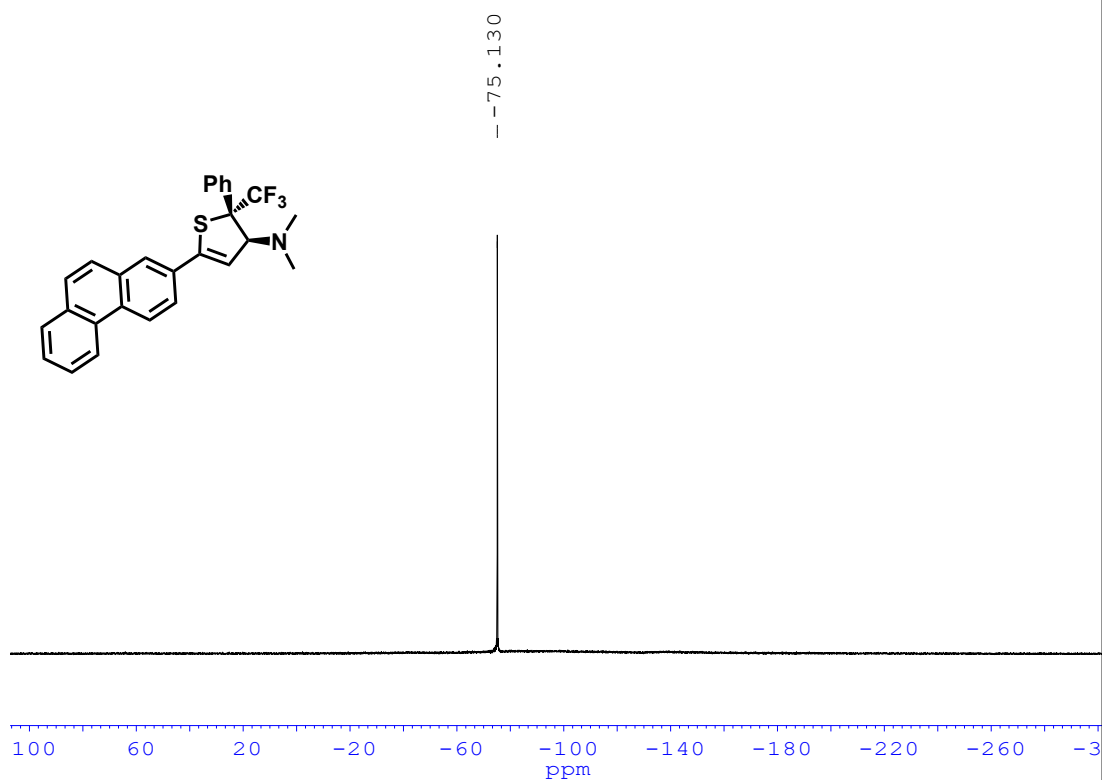

### <sup>13</sup>C NMR spectra of **3ap**

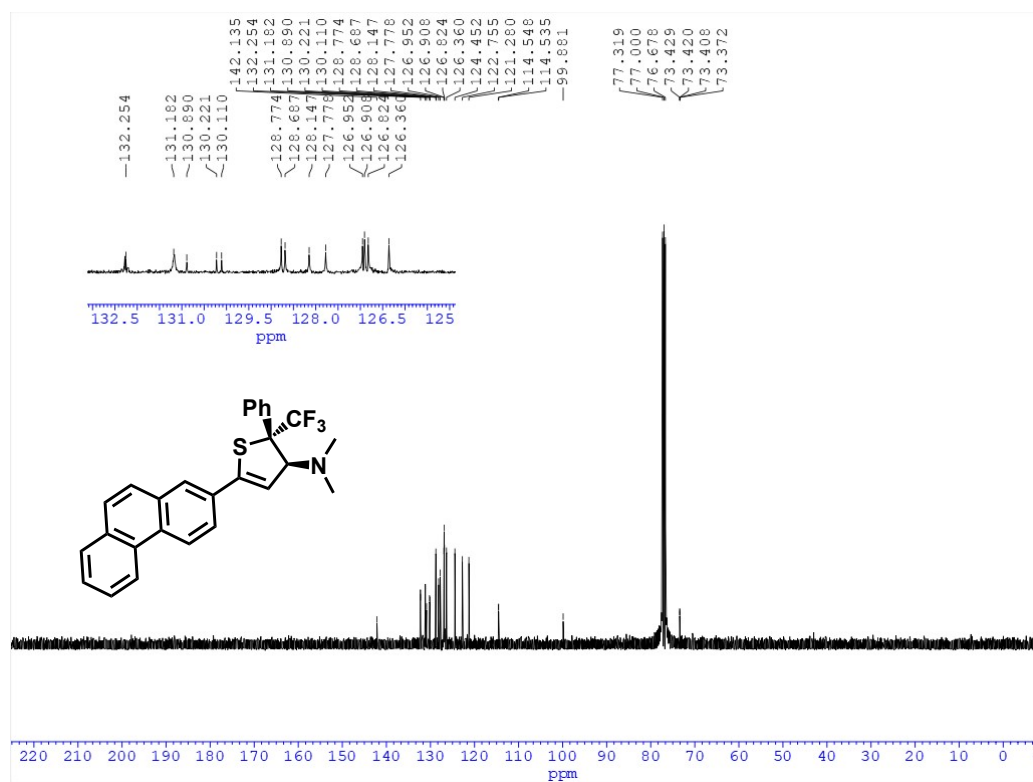

### <sup>1</sup>H NMR spectra of **3aq**

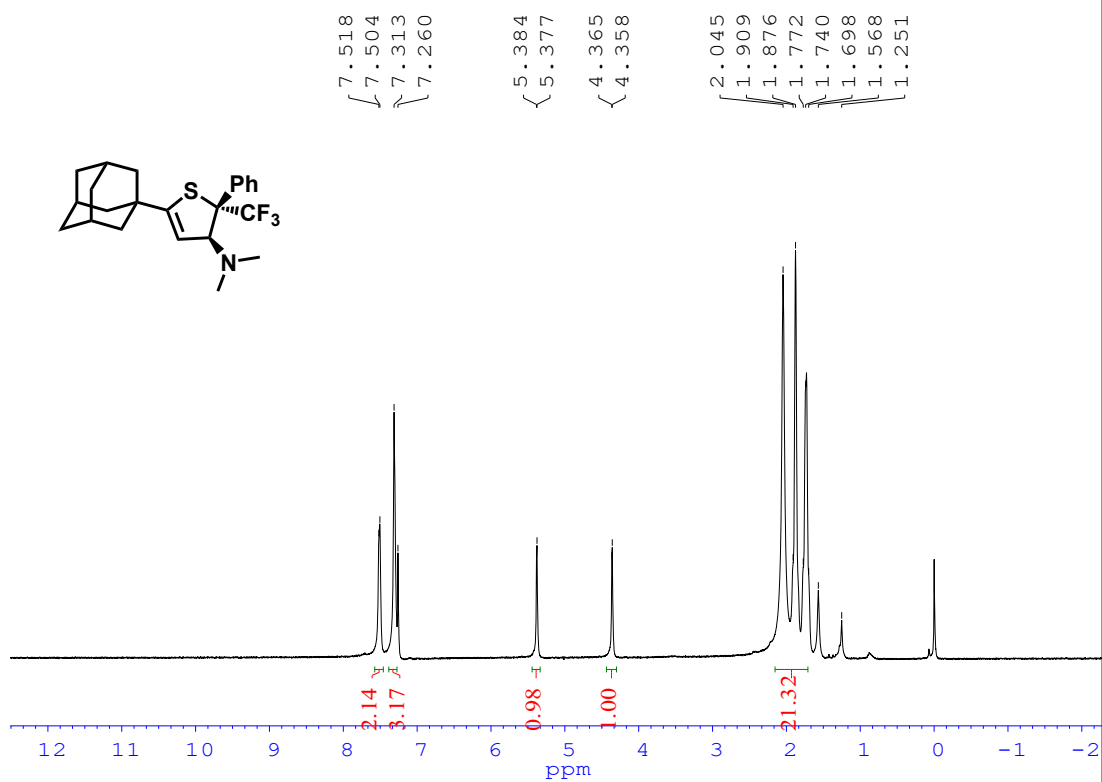

<sup>19</sup>F NMR spectra of **3aq**

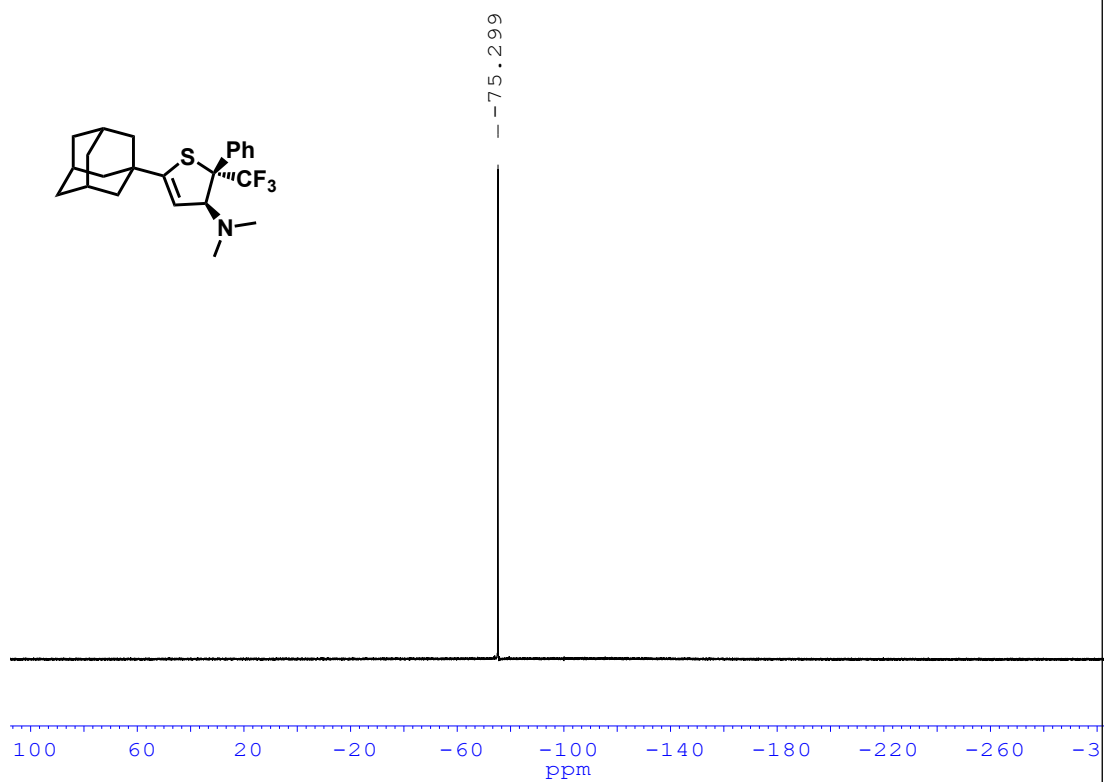

<sup>13</sup>C NMR spectra of **3aq**

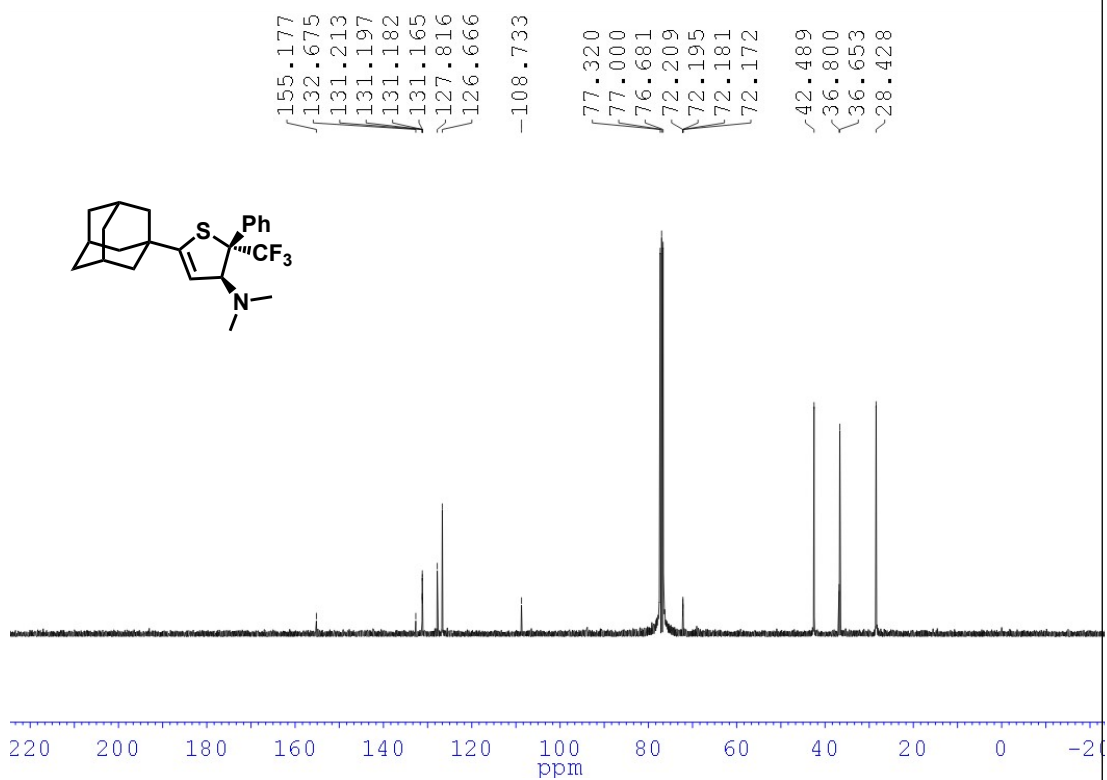

<sup>1</sup>H NMR spectra of **3ar**

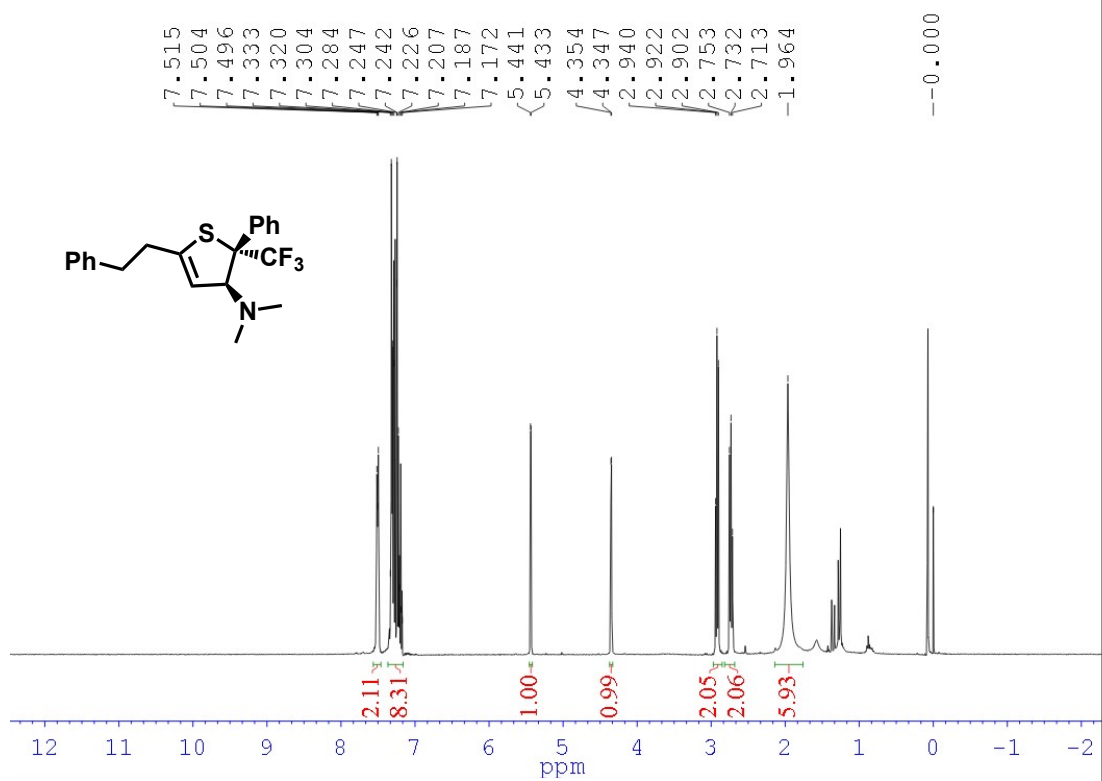

<sup>19</sup>F NMR spectra of **3ar**

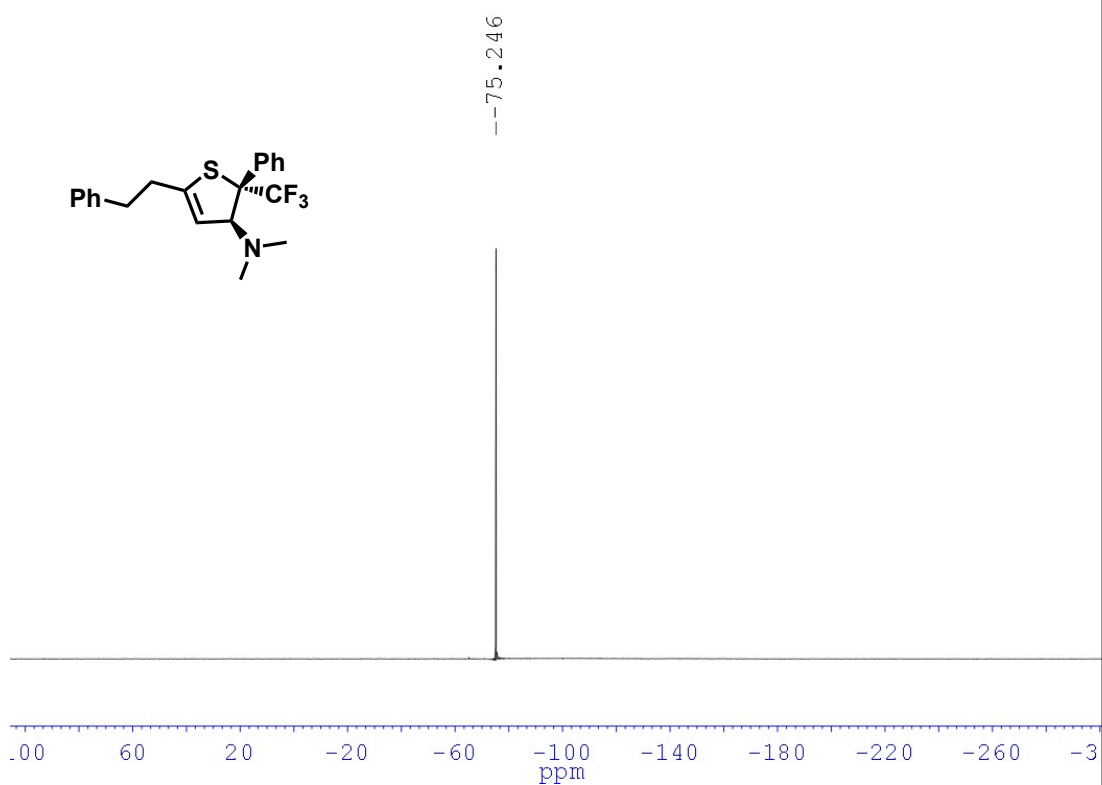

<sup>13</sup>C NMR spectra of **3ar**

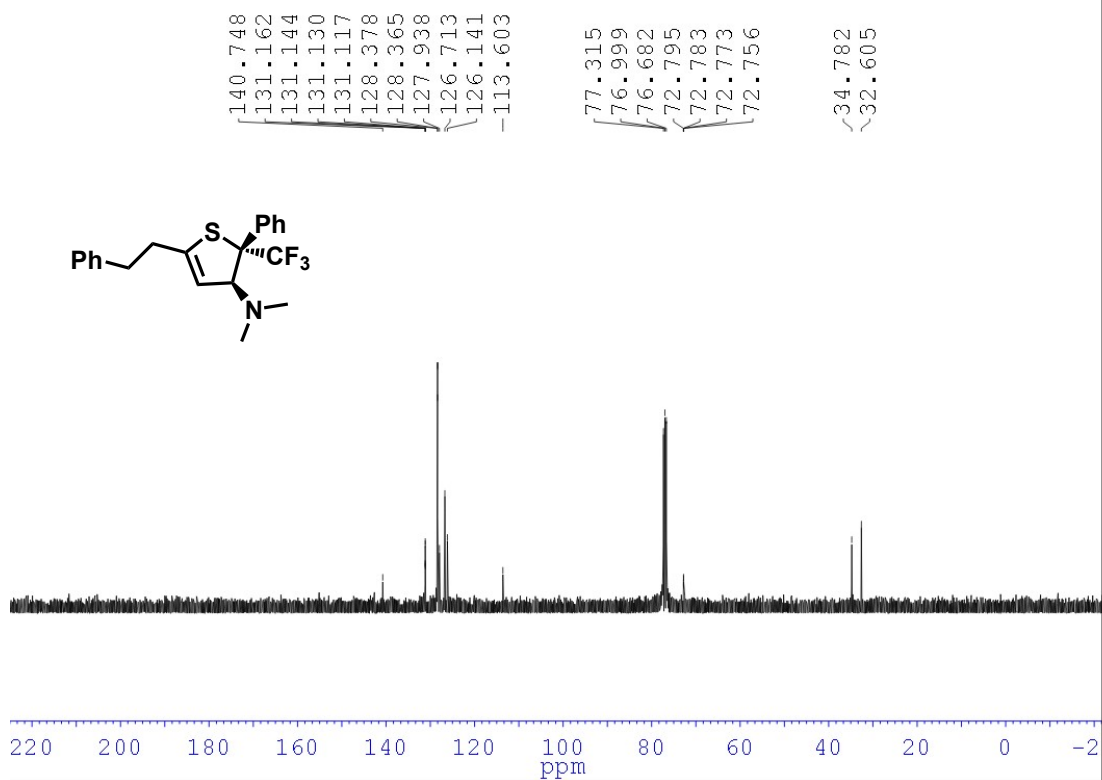

<sup>1</sup>H NMR spectra of **3as**

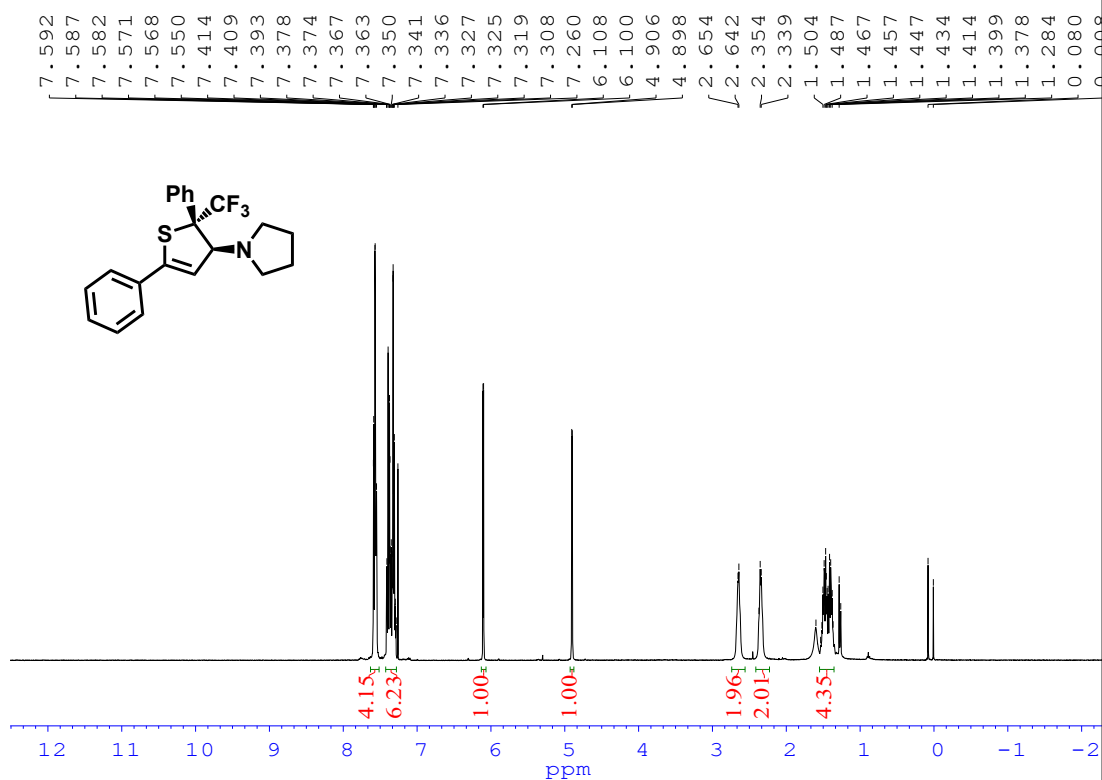

<sup>19</sup>F NMR spectra of **3as**

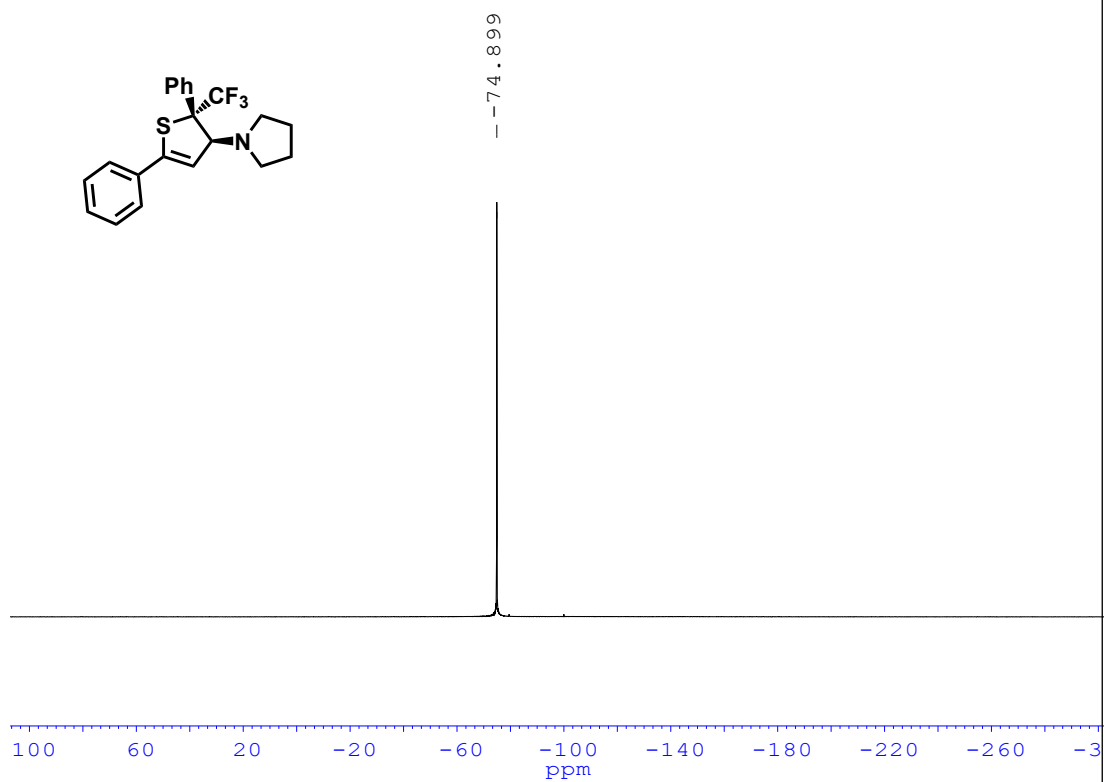

<sup>13</sup>C NMR spectra of **3as**

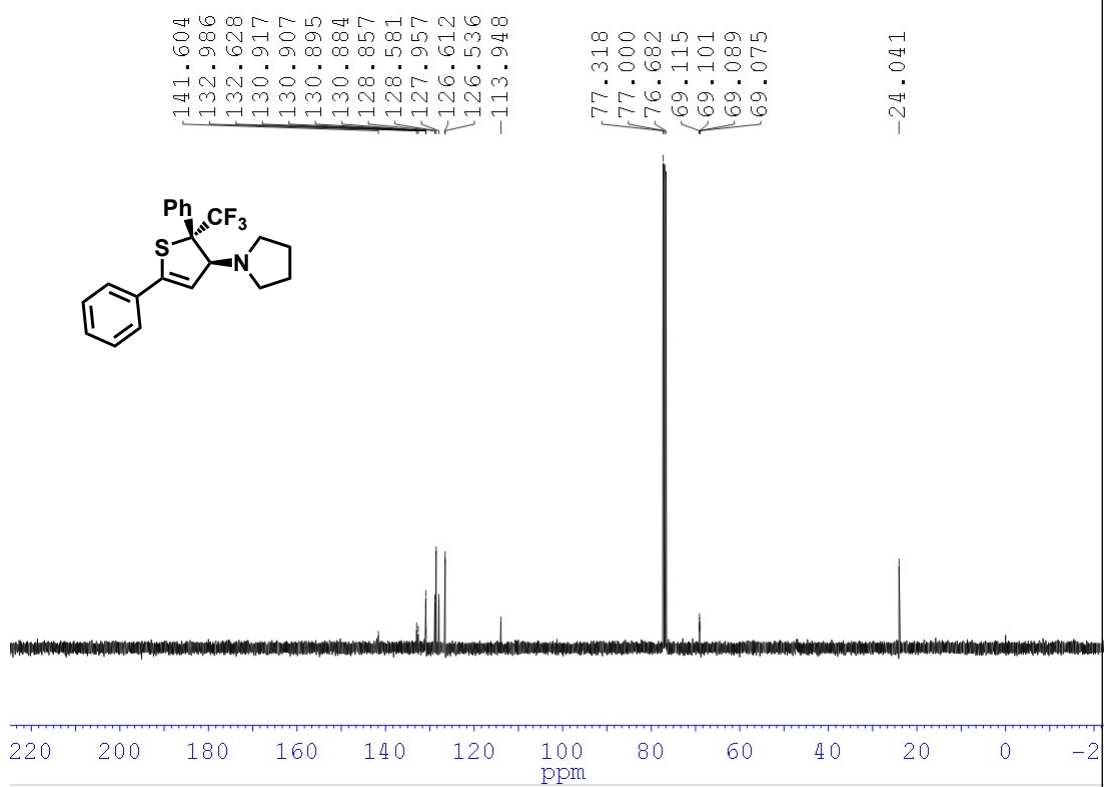



### <sup>1</sup>H NMR spectra of **3ba**

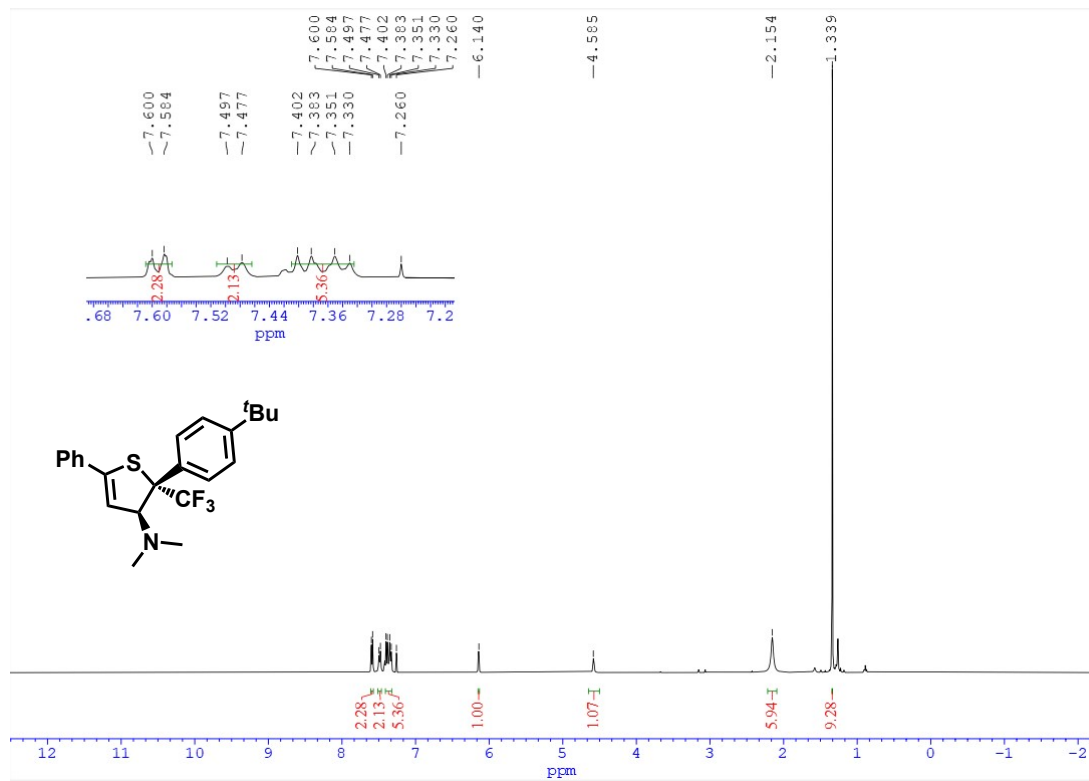

### <sup>19</sup>F NMR spectra of **3ba**

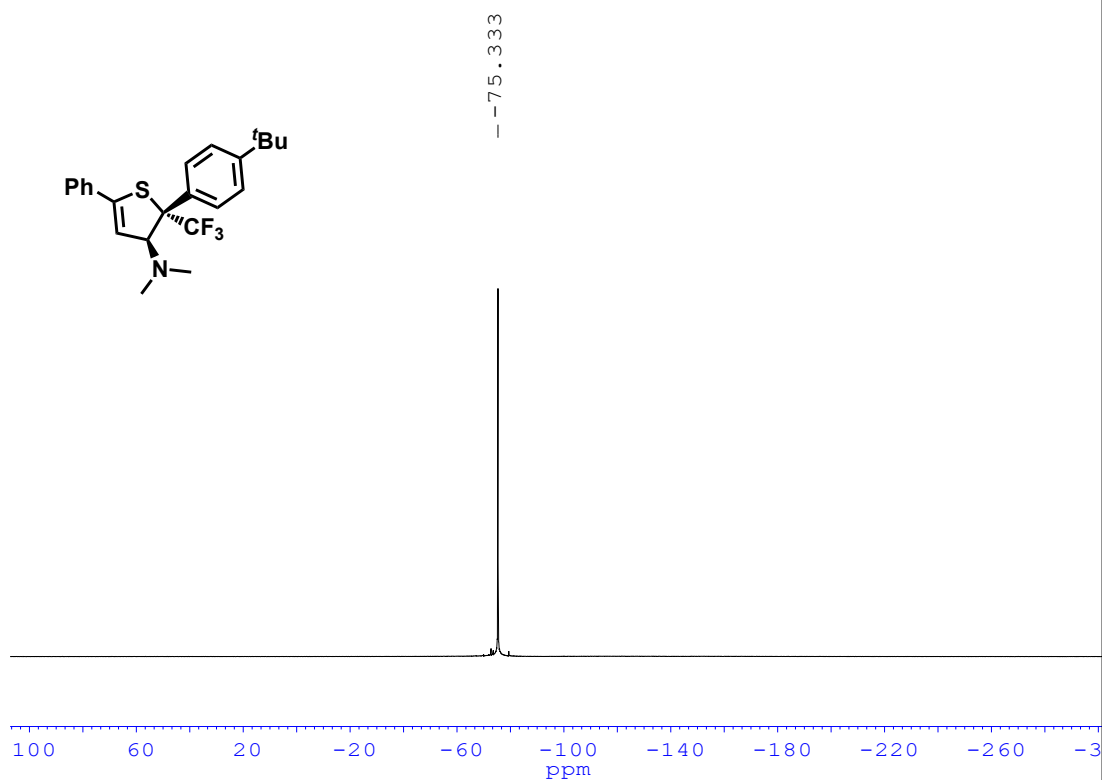

<sup>13</sup>C NMR spectra of **3ba**

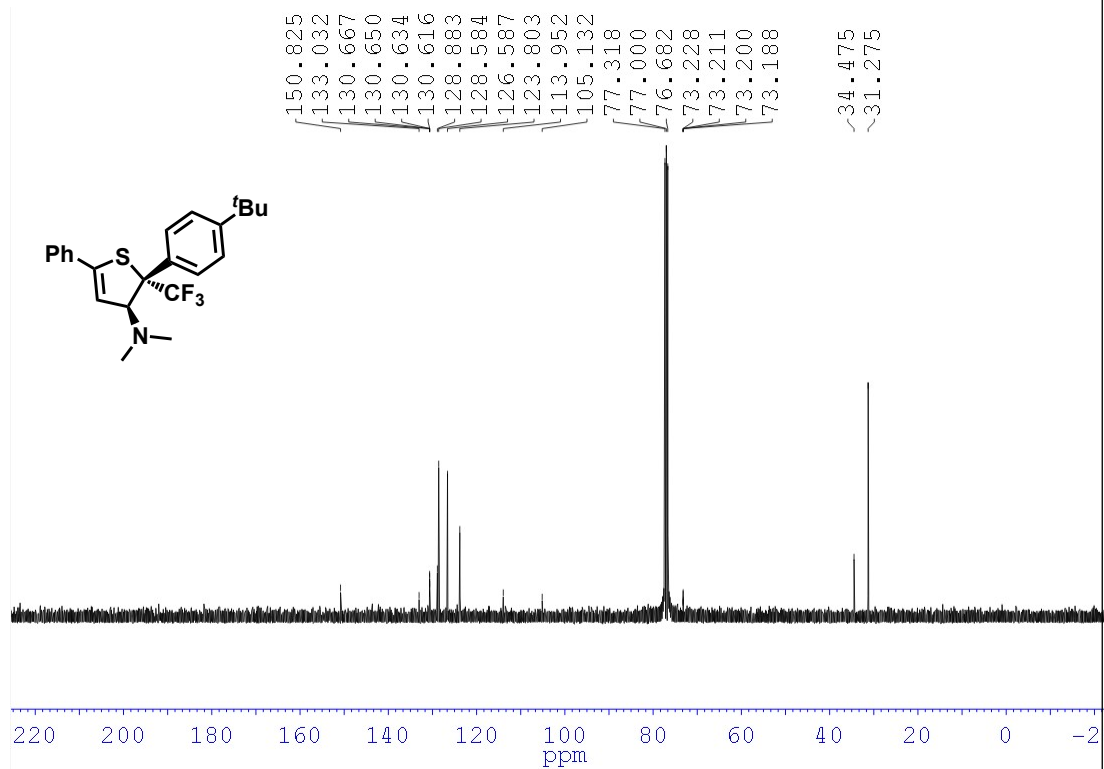

<sup>1</sup>H NMR spectra of **3ca**

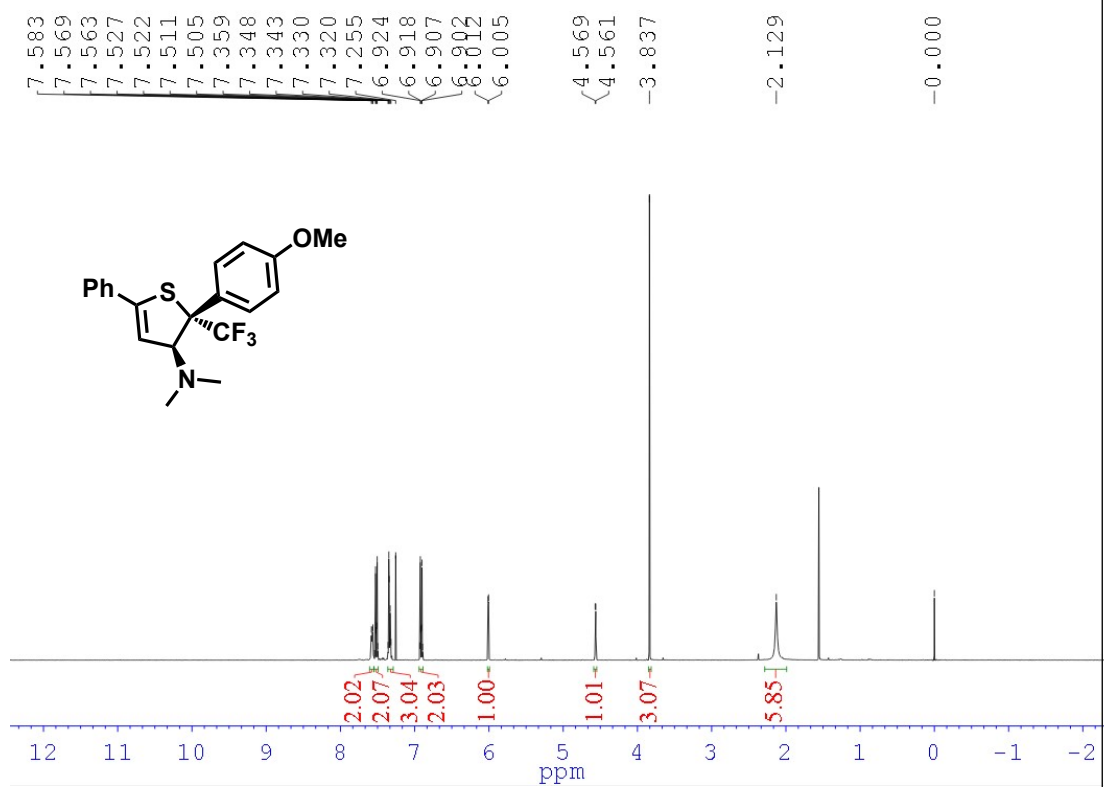

<sup>19</sup>F NMR spectra of **3ca**

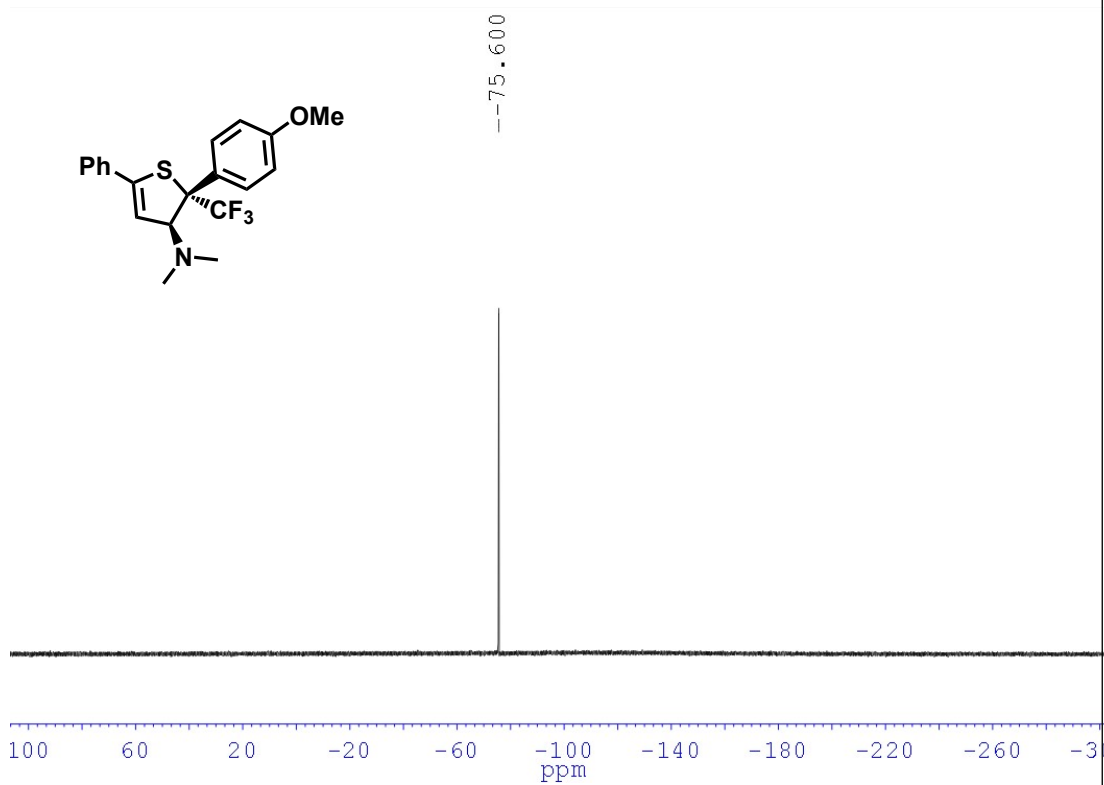

<sup>13</sup>C NMR spectra of **3ca**

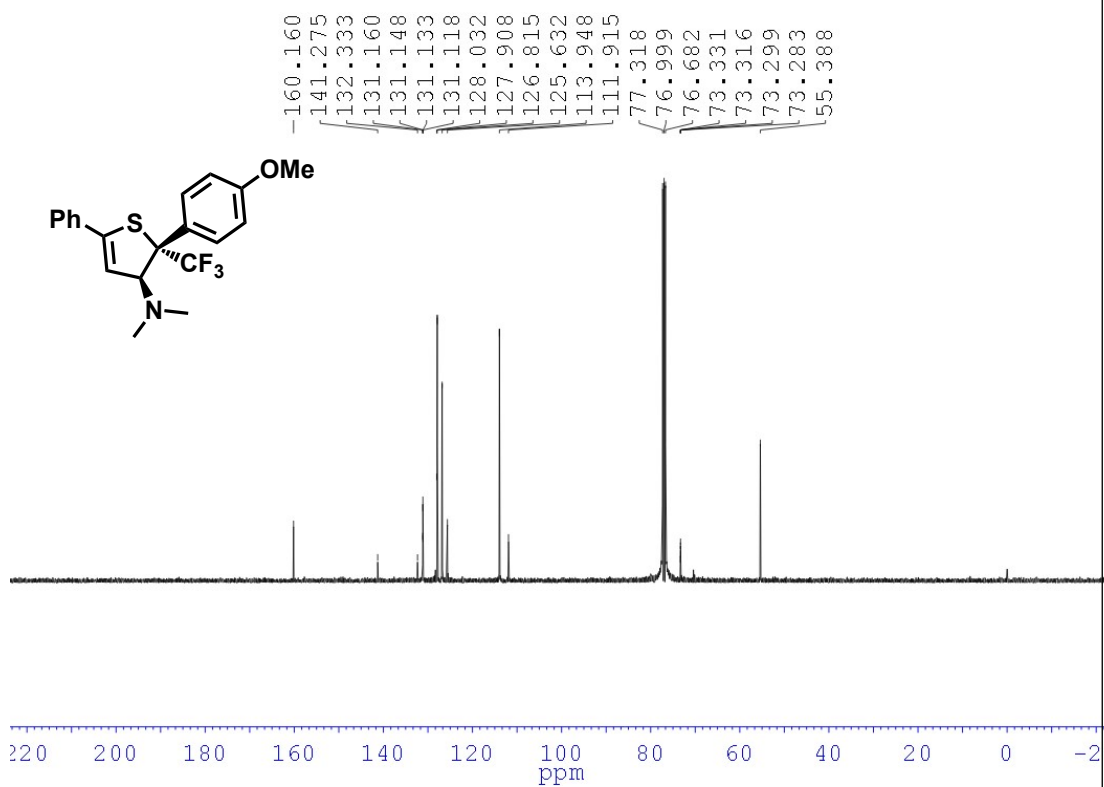

<sup>1</sup>H NMR spectra of **3da**

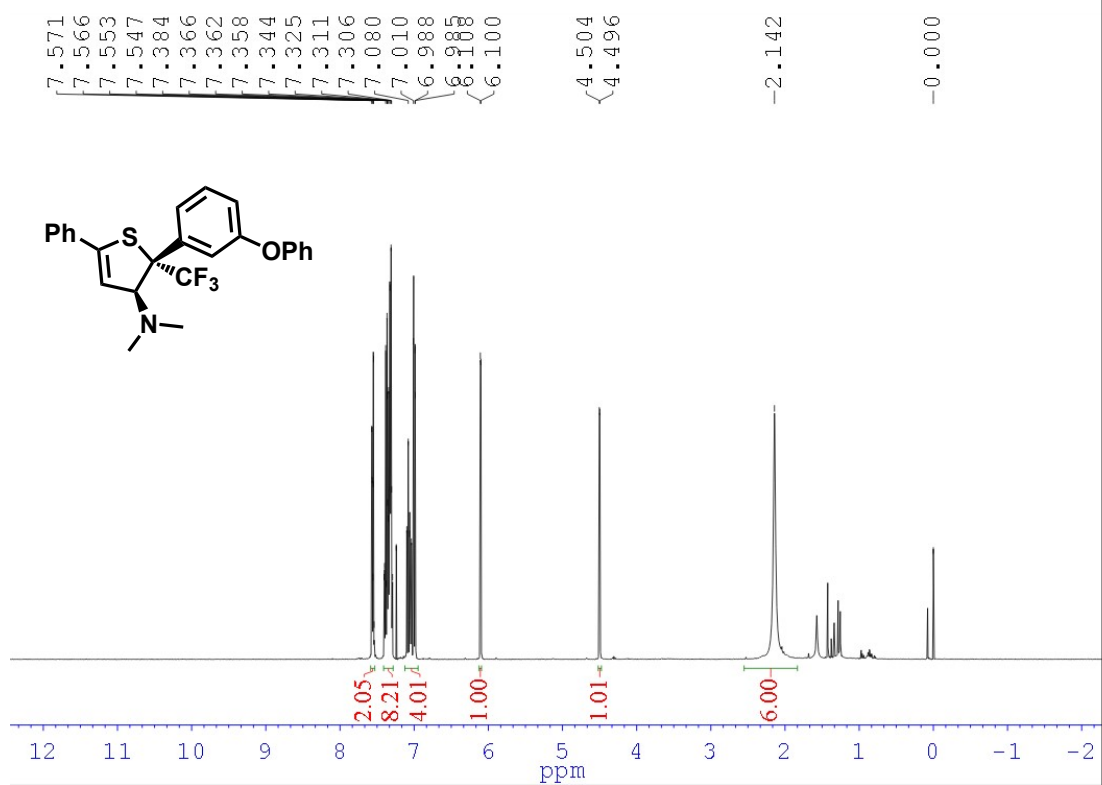

<sup>19</sup>F NMR spectra of **3da**

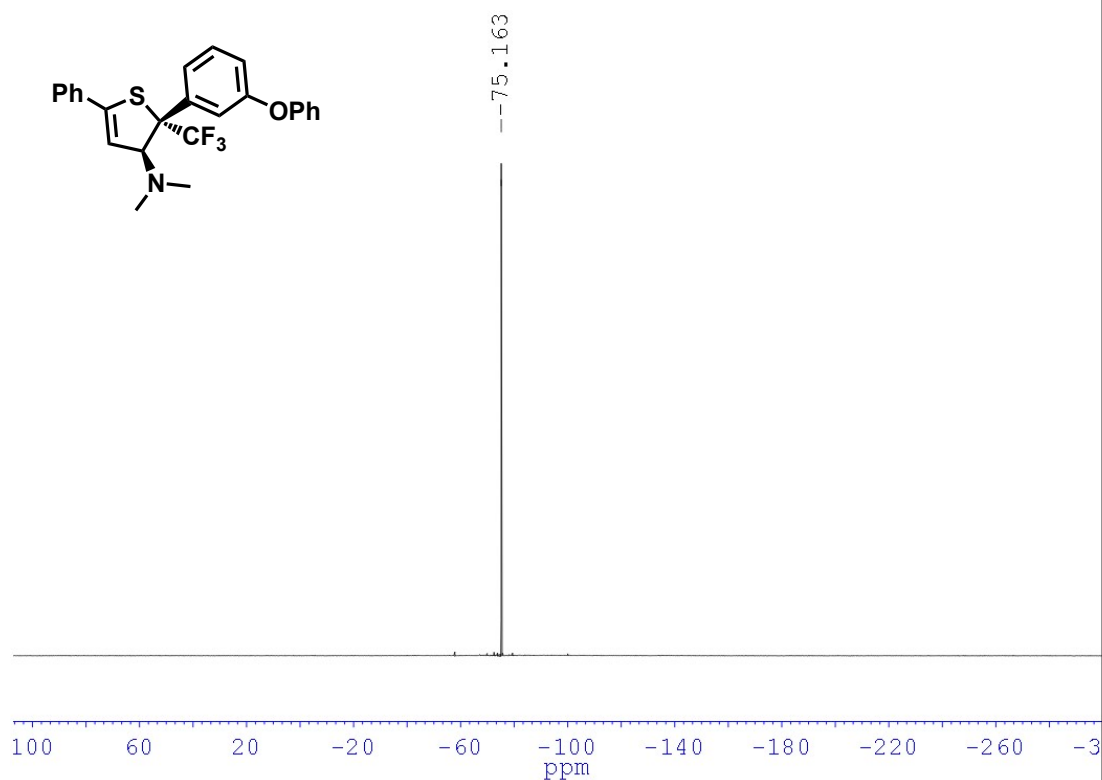

<sup>13</sup>C NMR spectra of **3da**

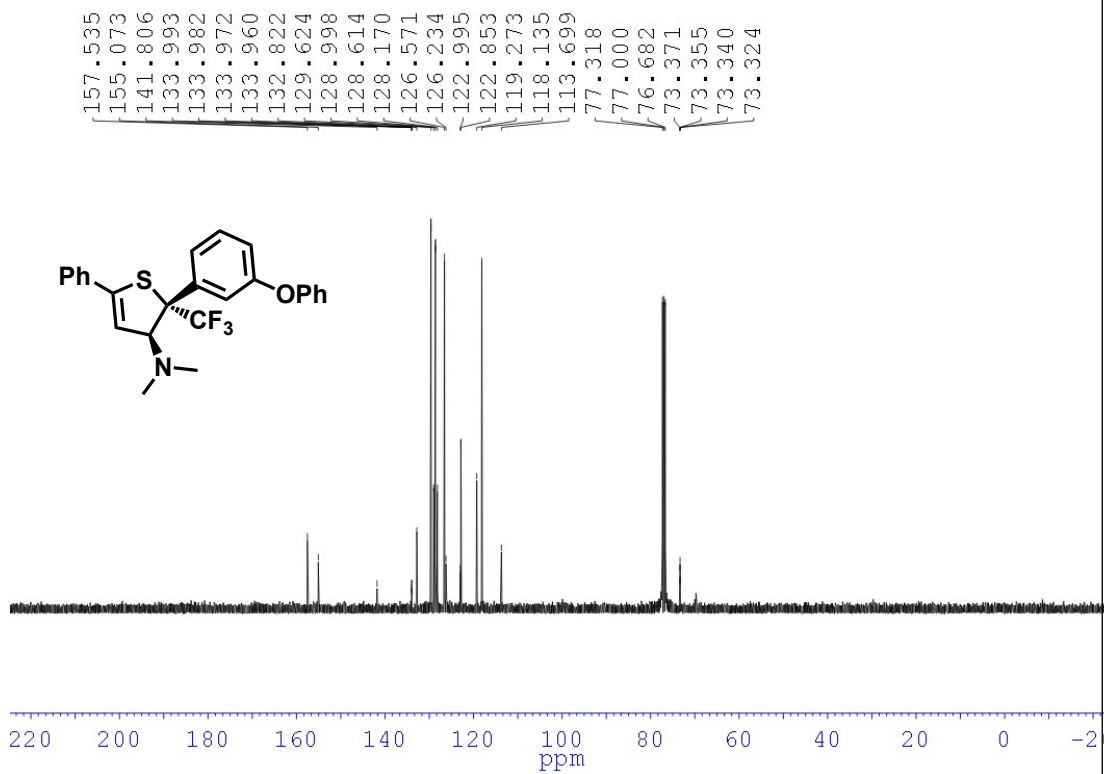

<sup>1</sup>H NMR spectra of **3ea**

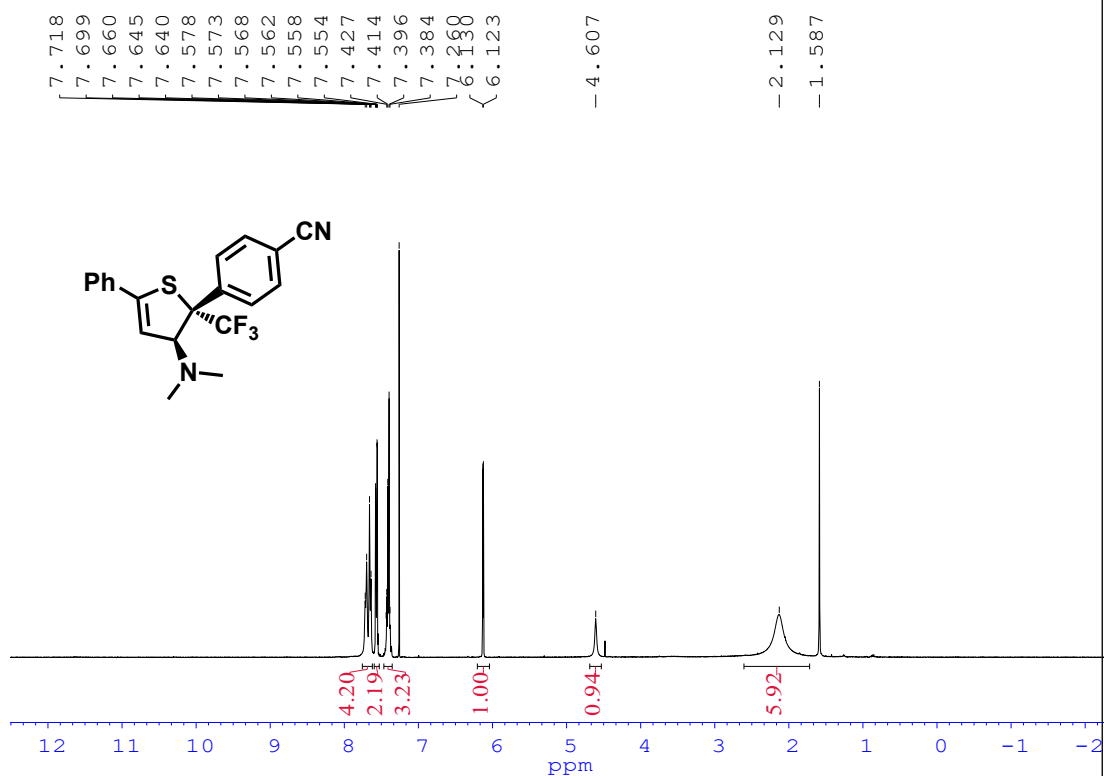

<sup>19</sup>F NMR spectra of **3ea**

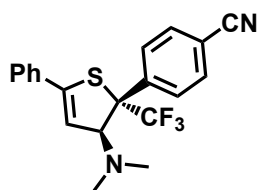

--74.884

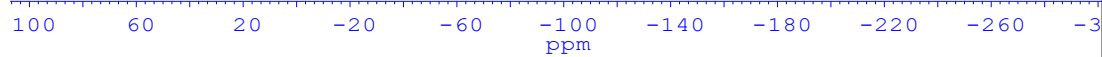

<sup>13</sup>C NMR spectra of **3ea**

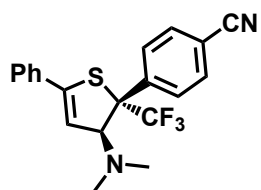

141.570  
137.556  
132.481  
131.990  
131.977  
131.963  
131.949  
130.497  
129.247  
128.706  
126.578  
118.562  
113.480  
112.126  
77.318  
76.999  
76.683  
73.599  
73.584  
73.572  
73.561

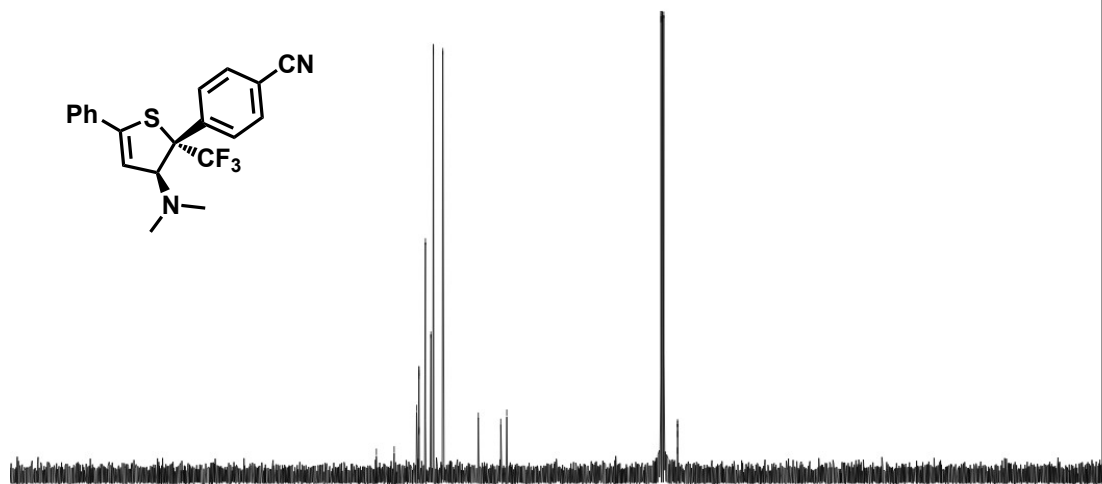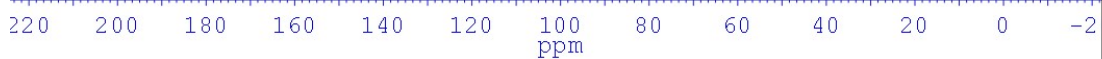

<sup>1</sup>H NMR spectra of **3fa**

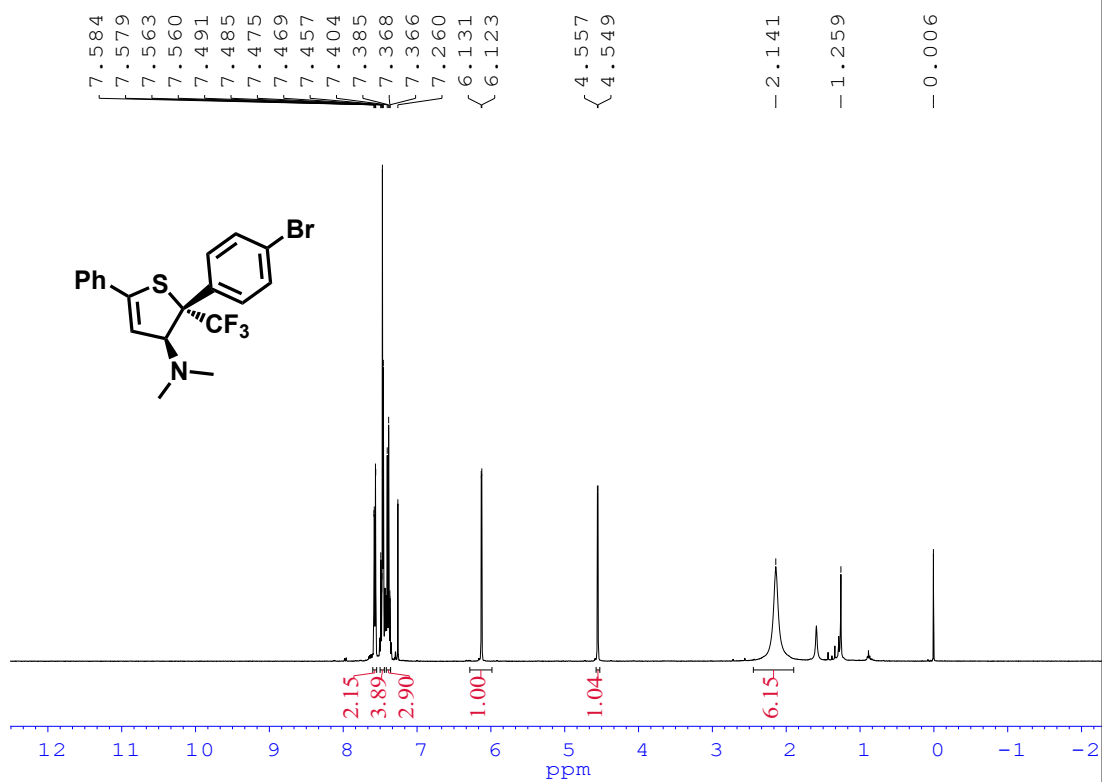

<sup>19</sup>F NMR spectra of **3fa**

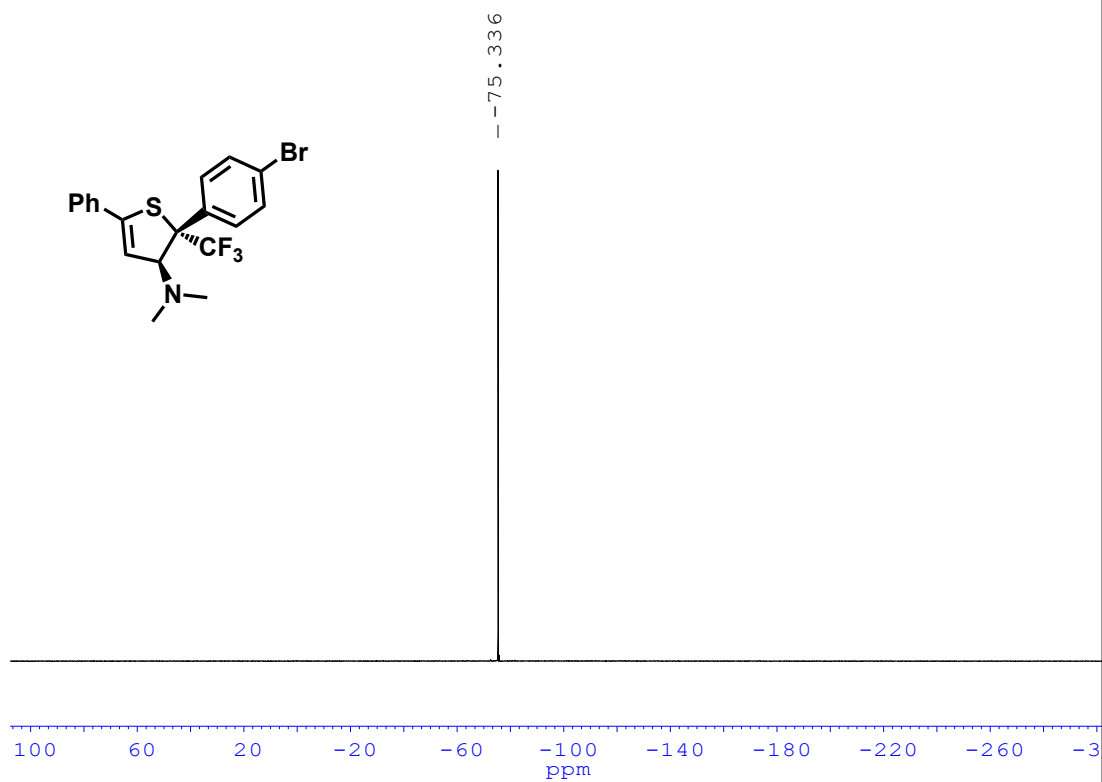

<sup>13</sup>C NMR spectra of **3fa**

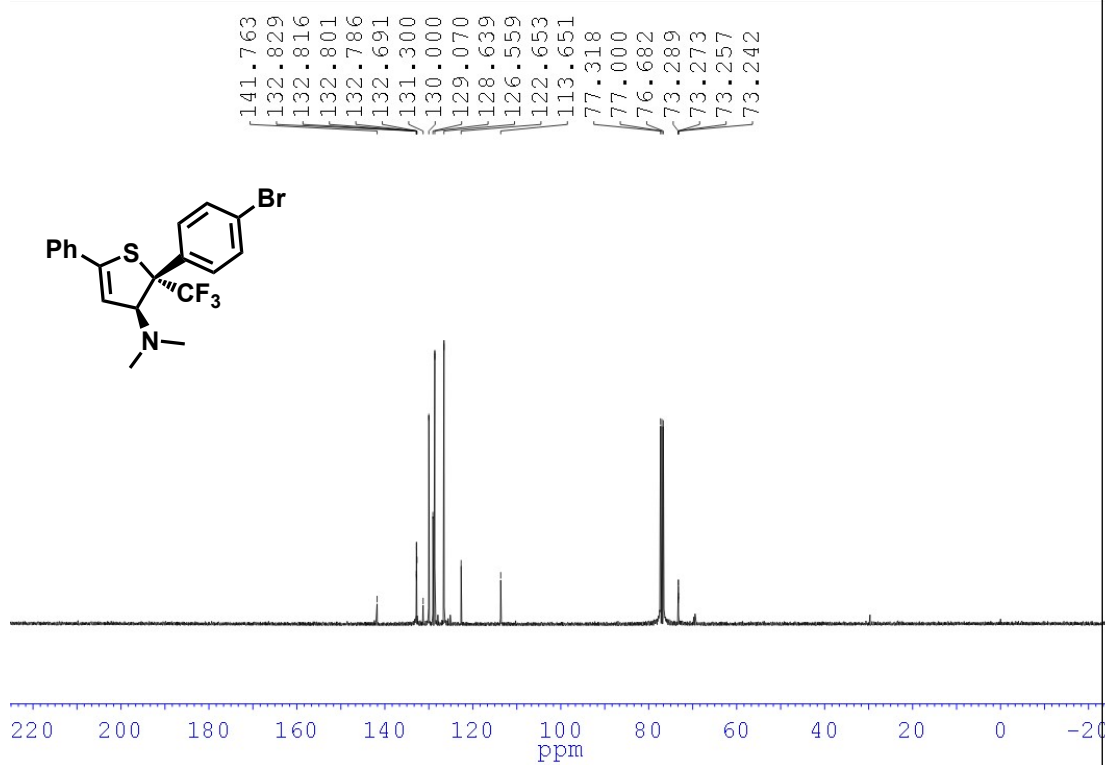

<sup>1</sup>H NMR spectra of **3ga**

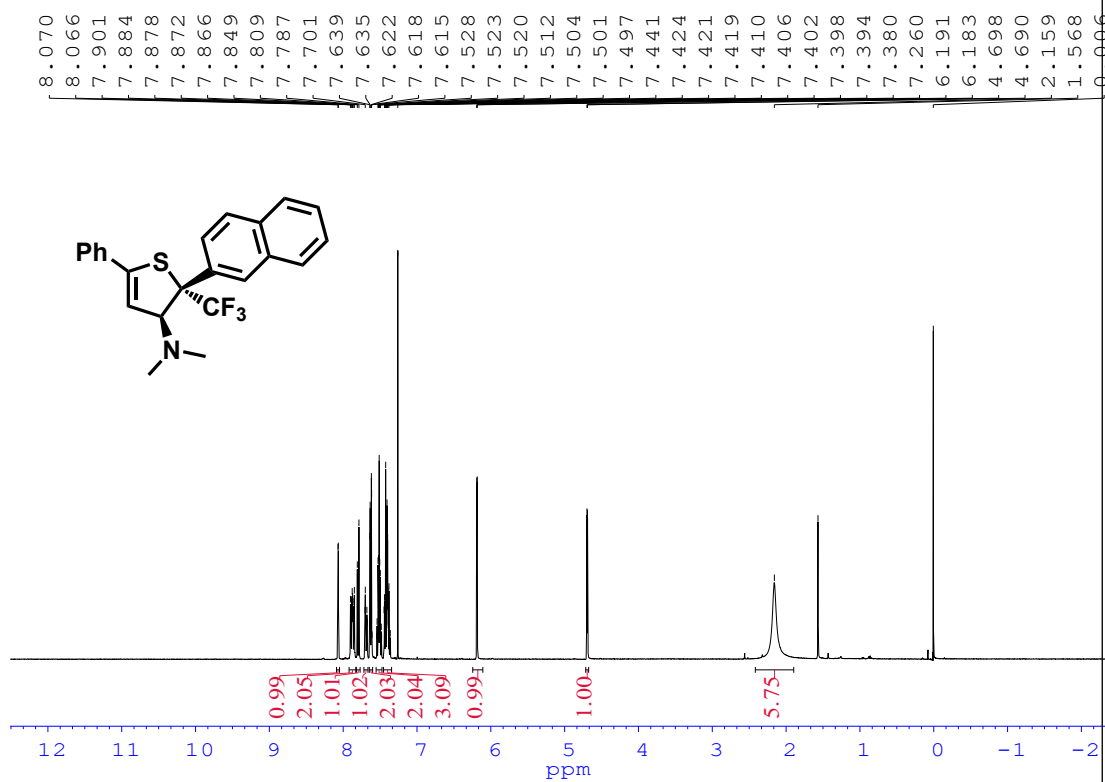



<sup>19</sup>F NMR spectra of **3ga**

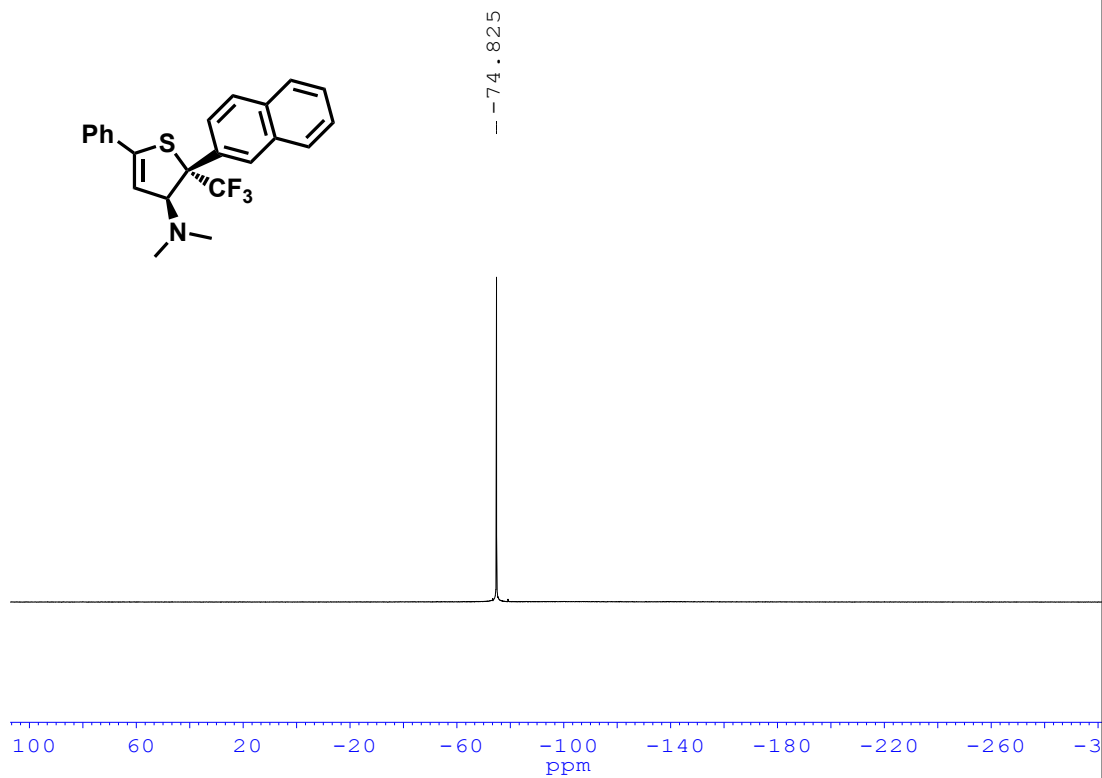

<sup>13</sup>C NMR spectra of **3ga**

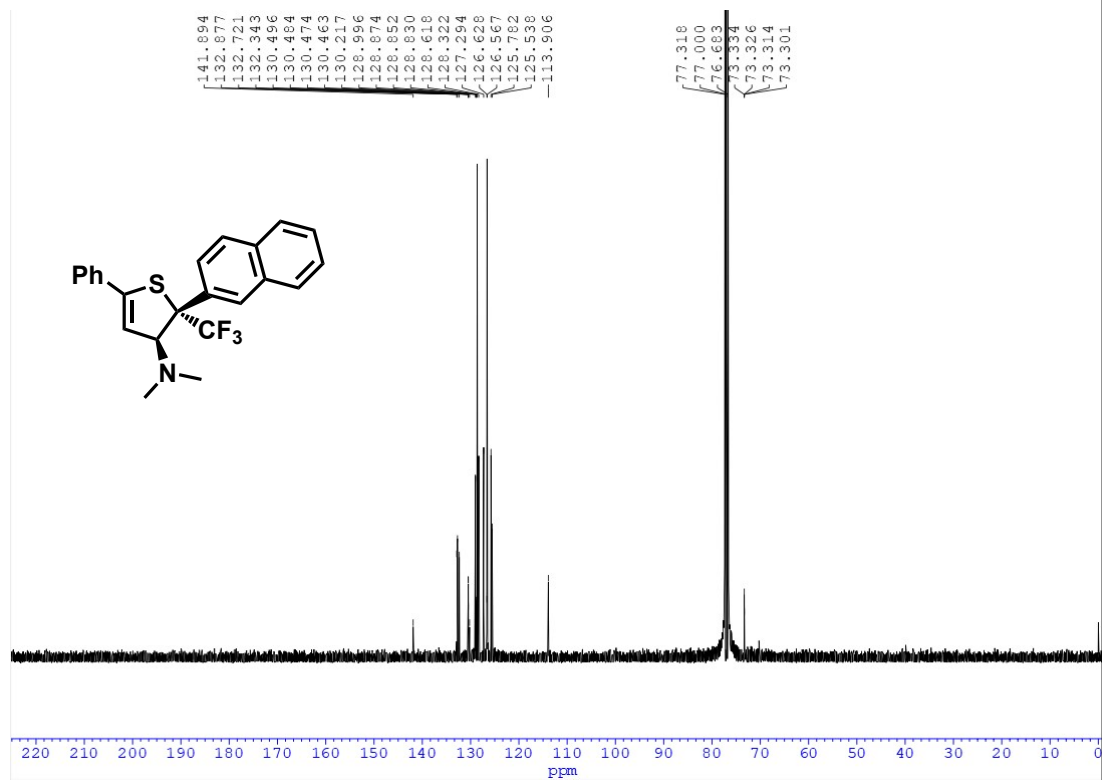

### <sup>1</sup>H NMR spectra of **3ha**

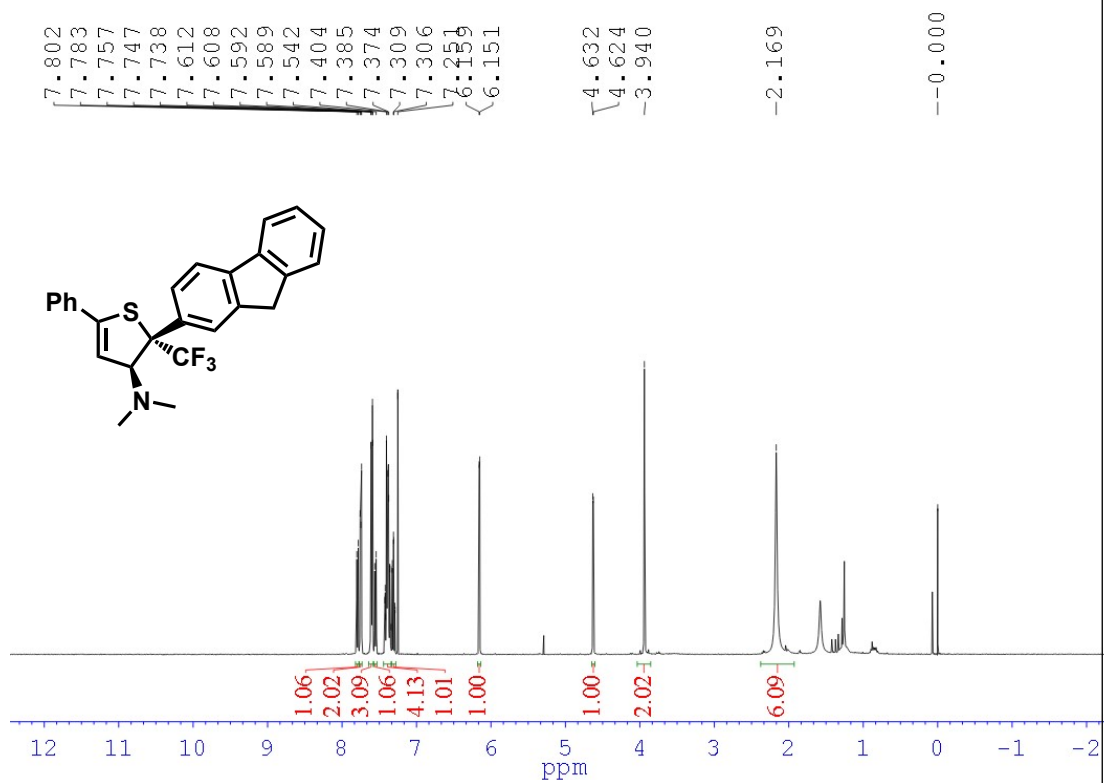

### <sup>19</sup>F NMR spectra of **3ha**

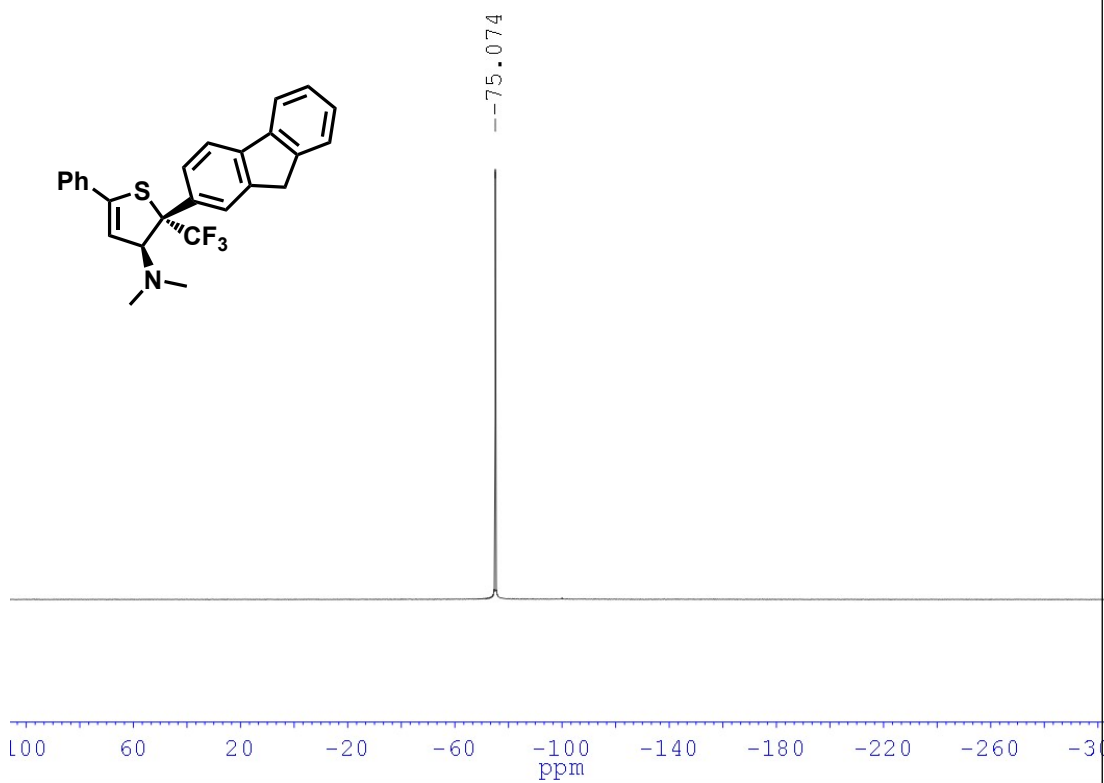

<sup>13</sup>C NMR spectra of **3ha**

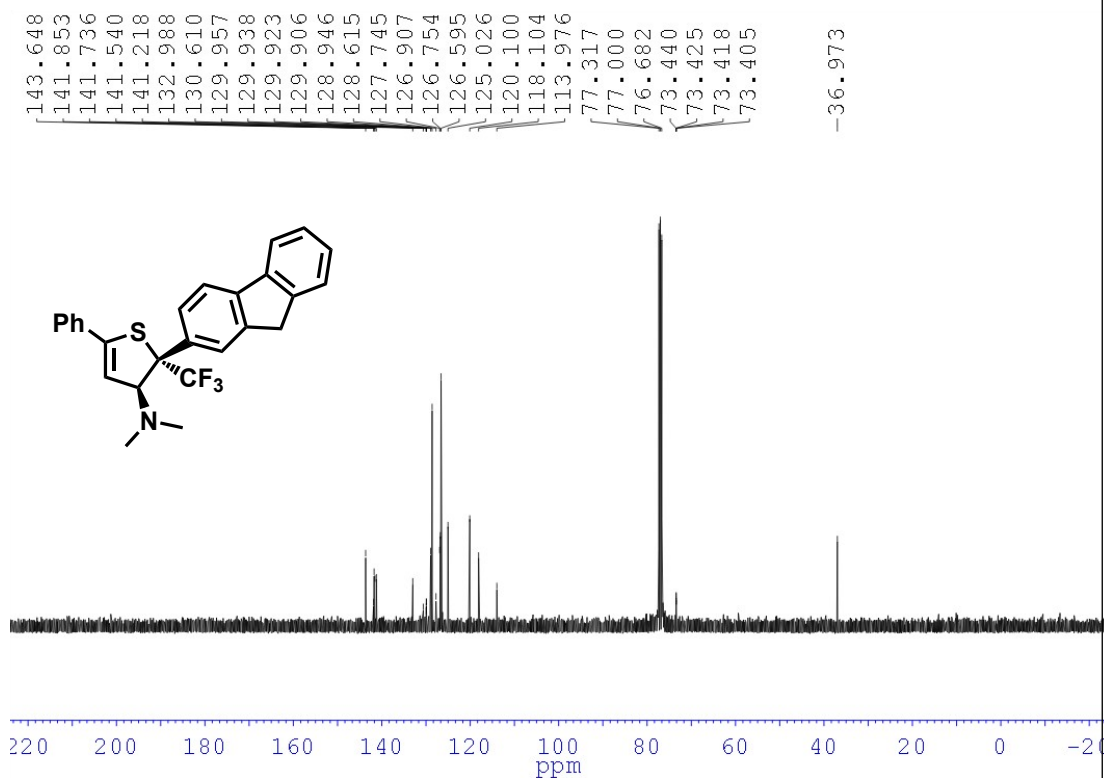

<sup>1</sup>H NMR spectra of **3ia**

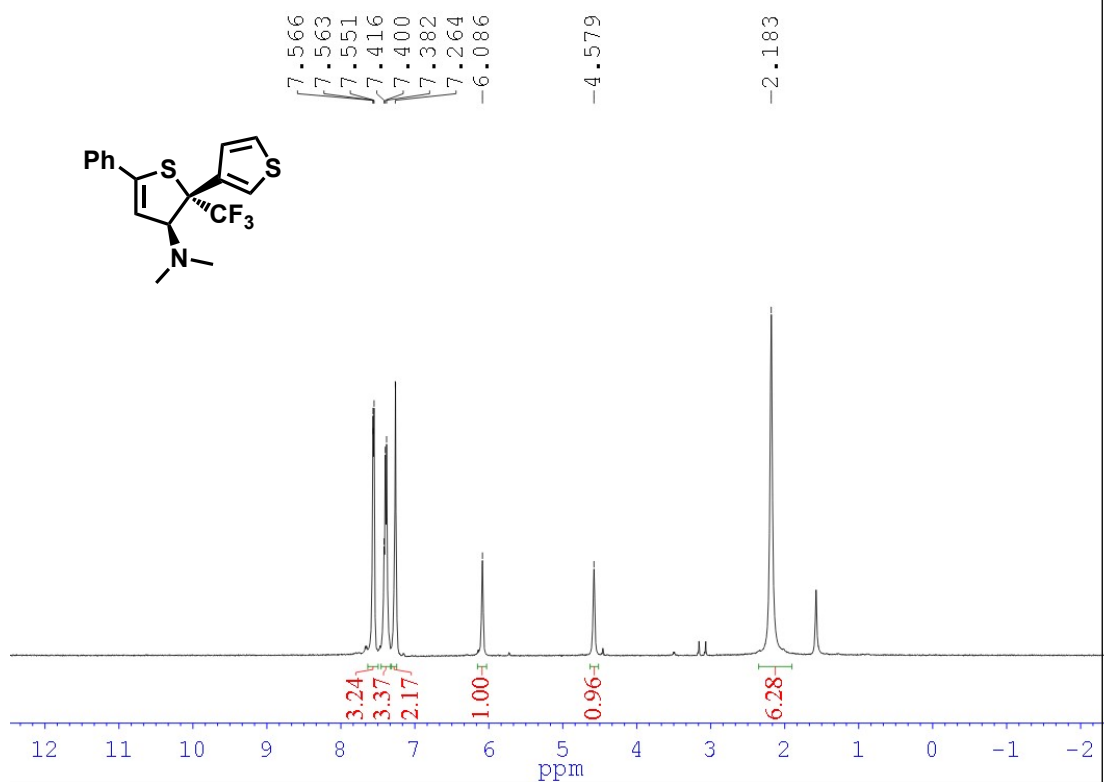

<sup>19</sup>F NMR spectra of **3ia**

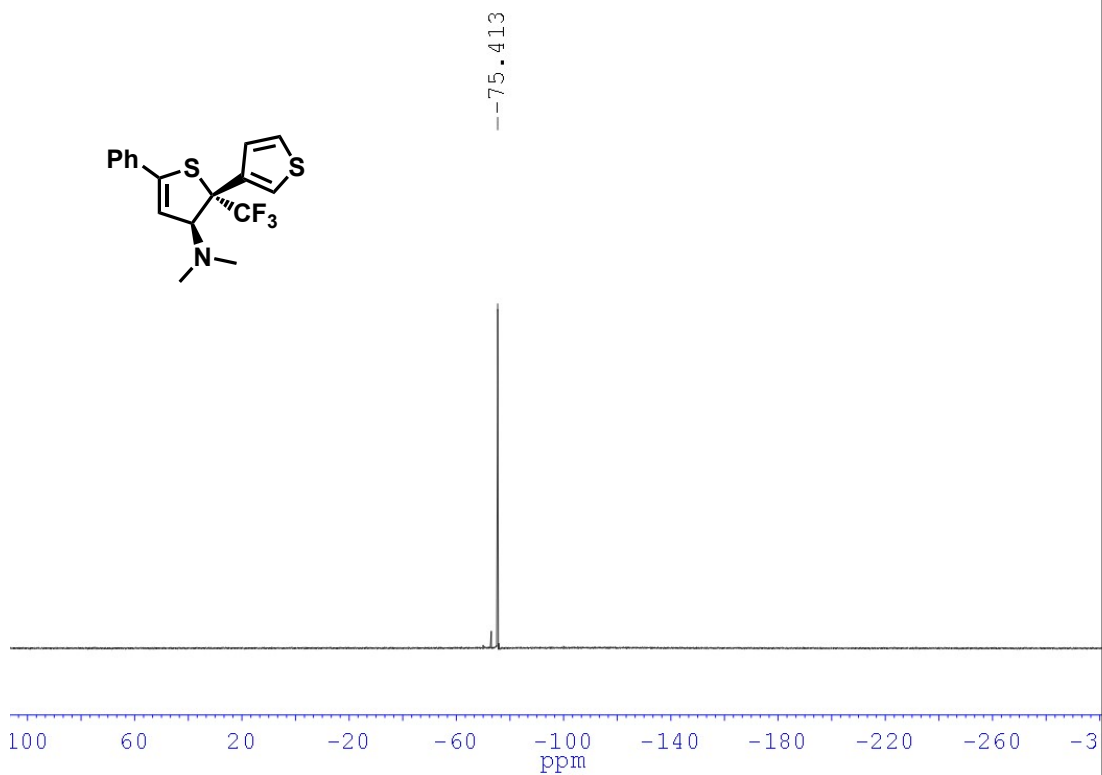

<sup>13</sup>C NMR spectra of **3ia**

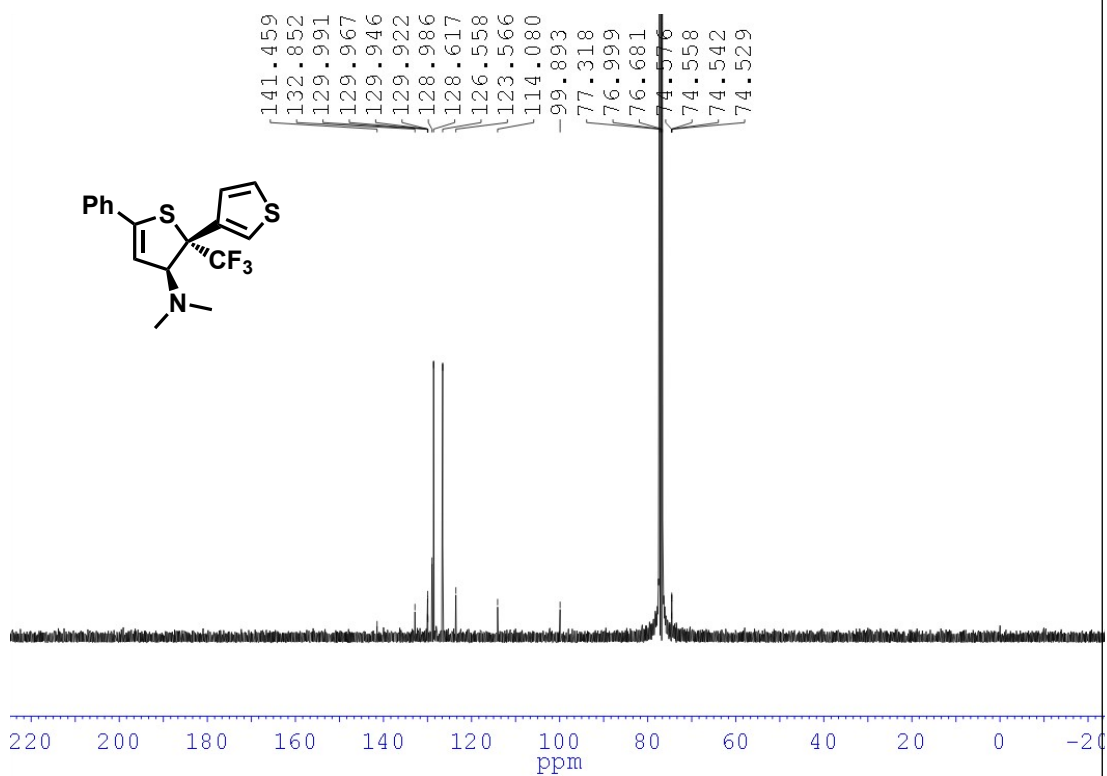

#### 4.4 NMR spectra for derivative products:

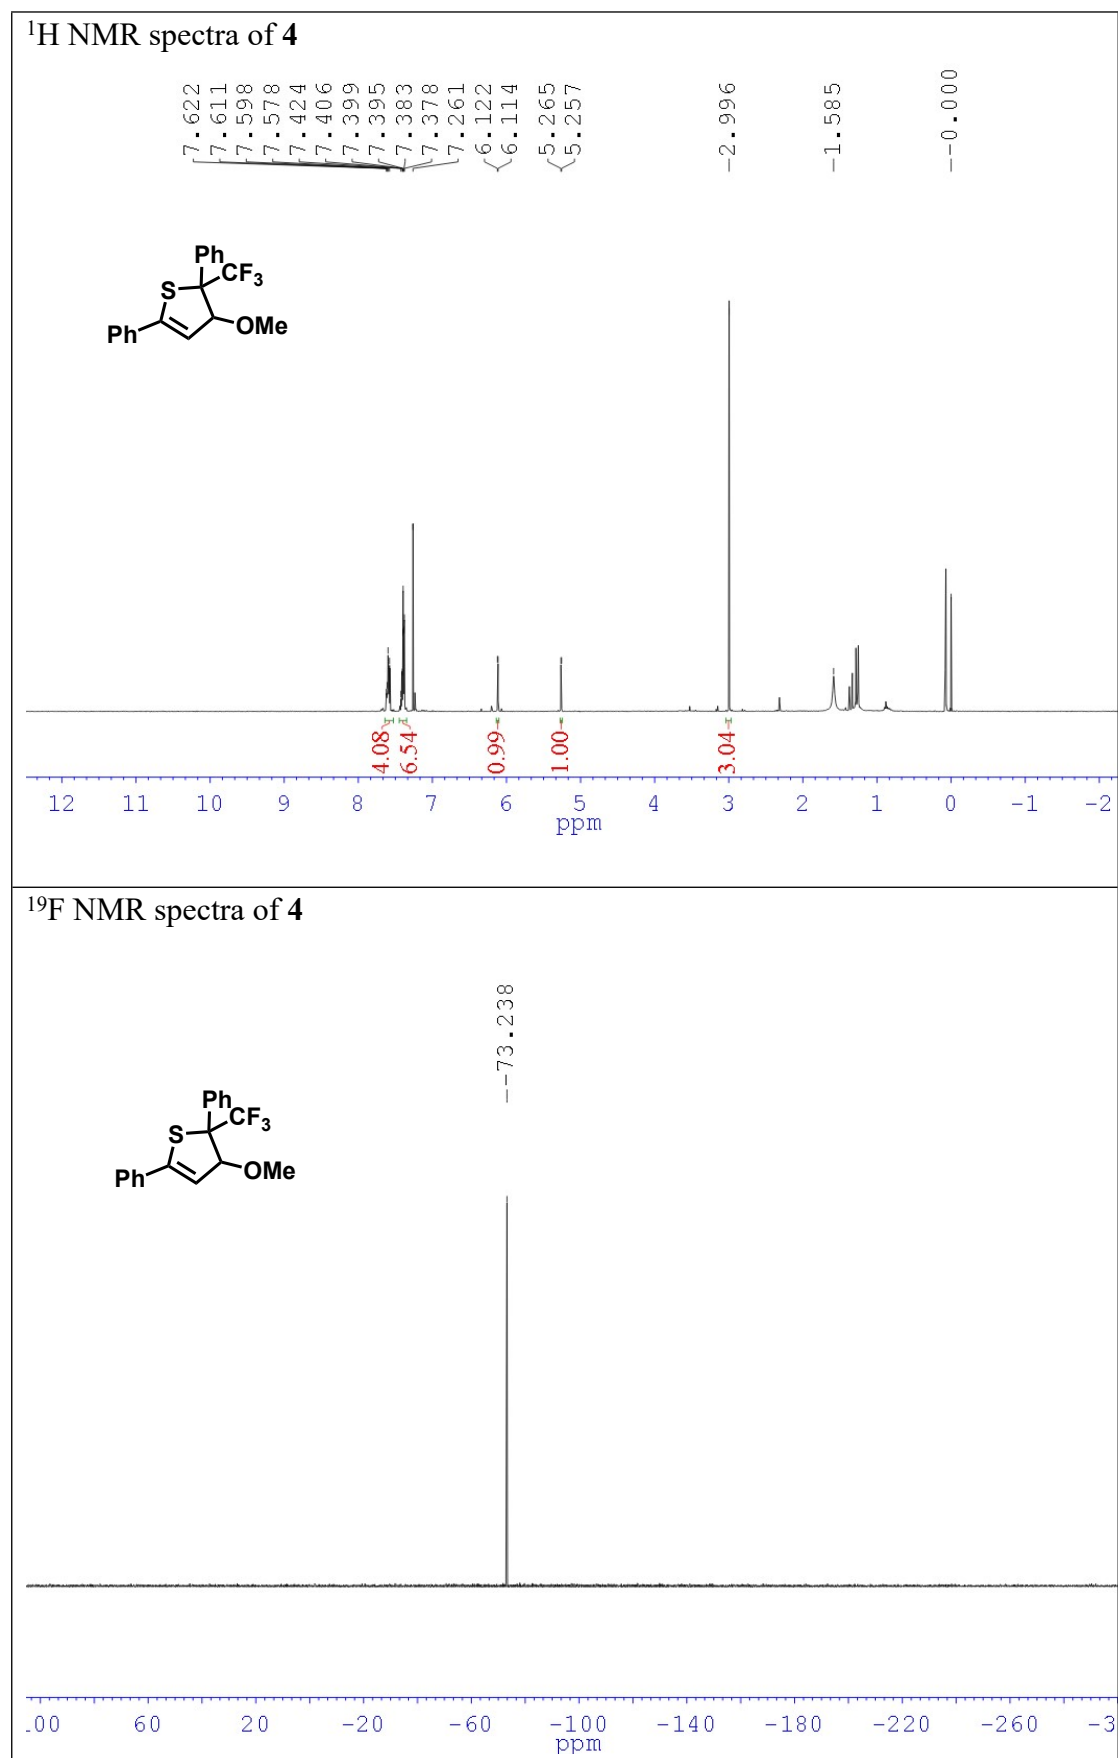

<sup>13</sup>C NMR spectra of **4**

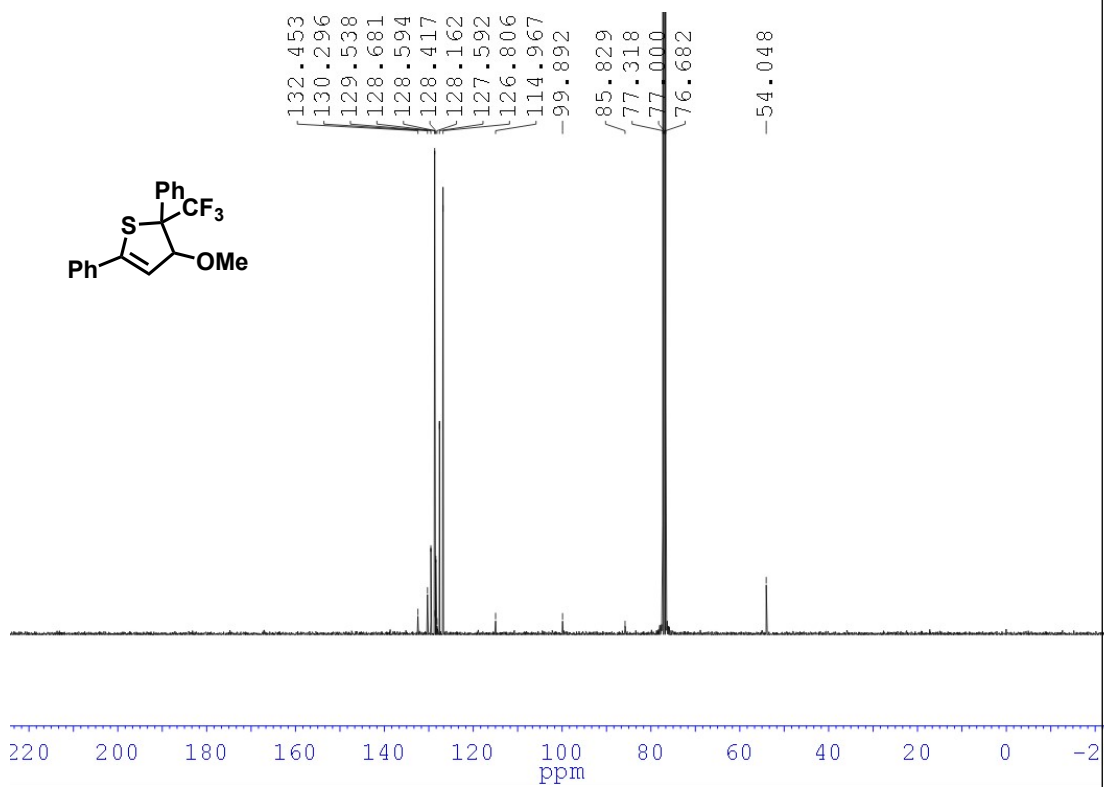

<sup>1</sup>H NMR spectra of **5**

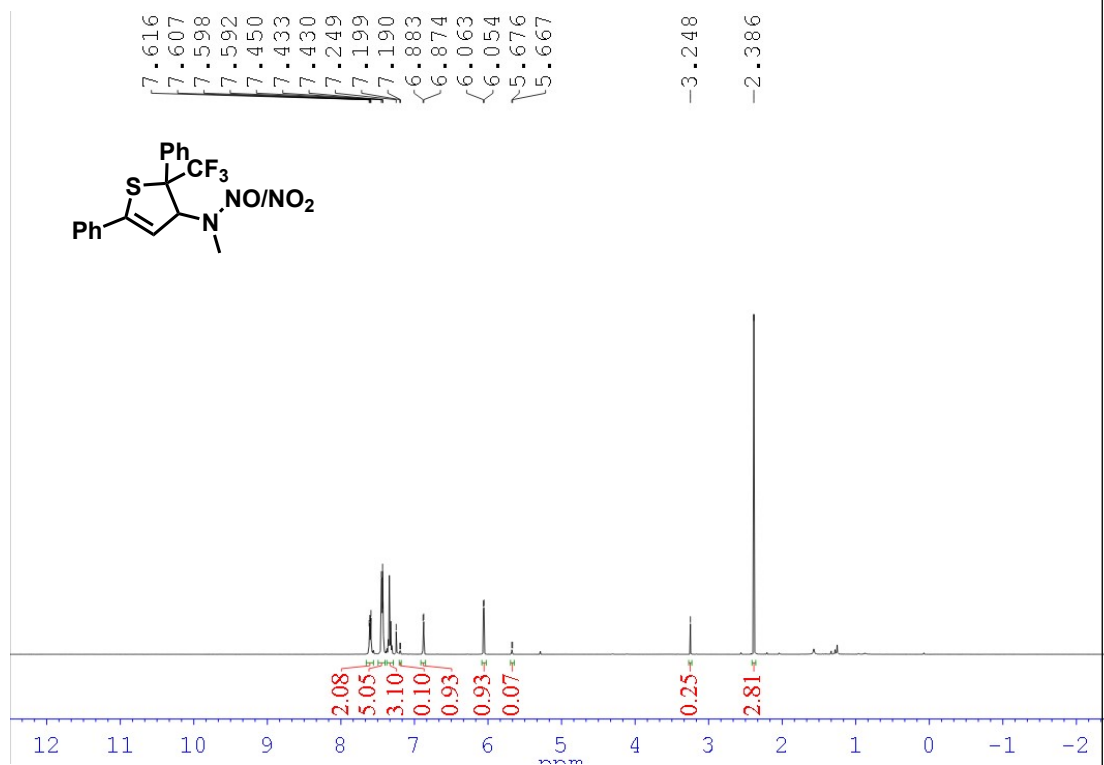

<sup>19</sup>F NMR spectra of **5**

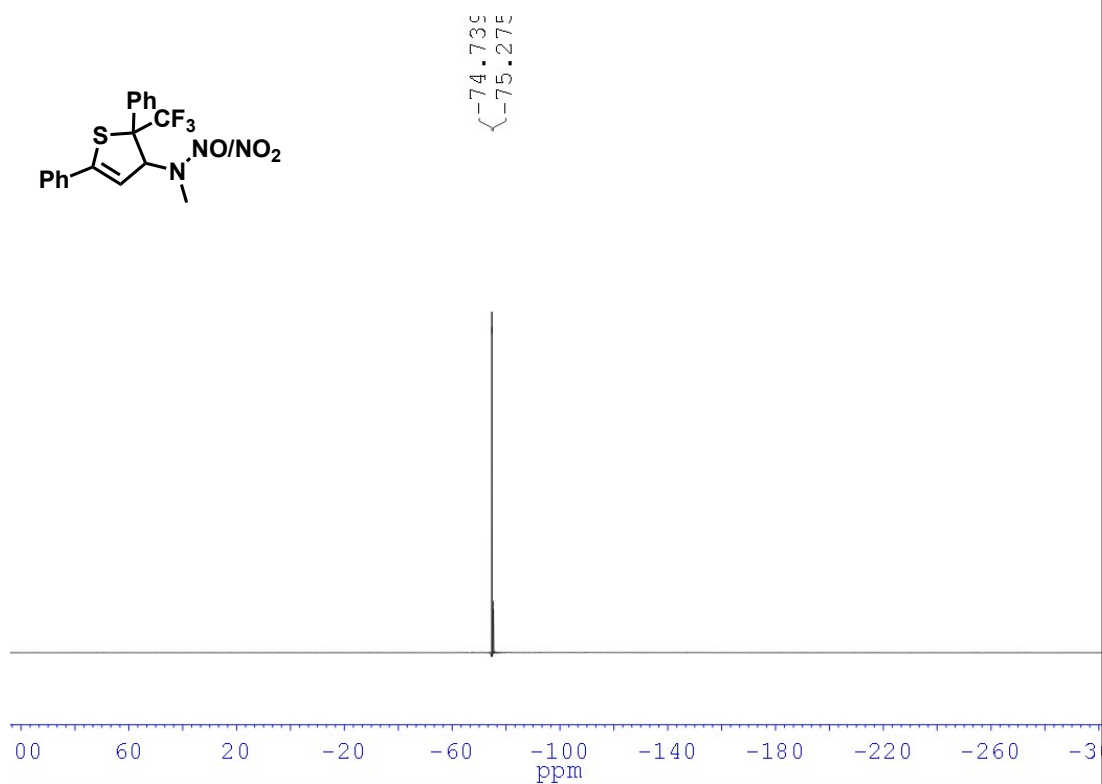

<sup>13</sup>C NMR spectra of **5**

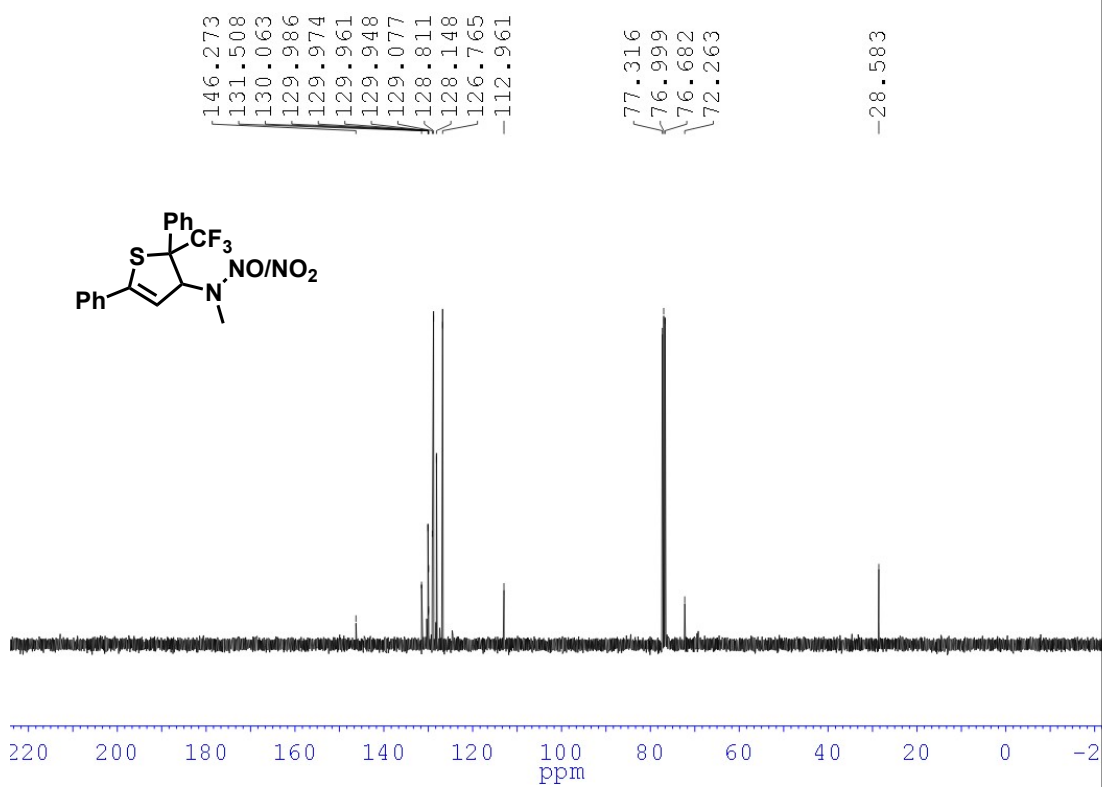

<sup>1</sup>H NMR spectra of **6**

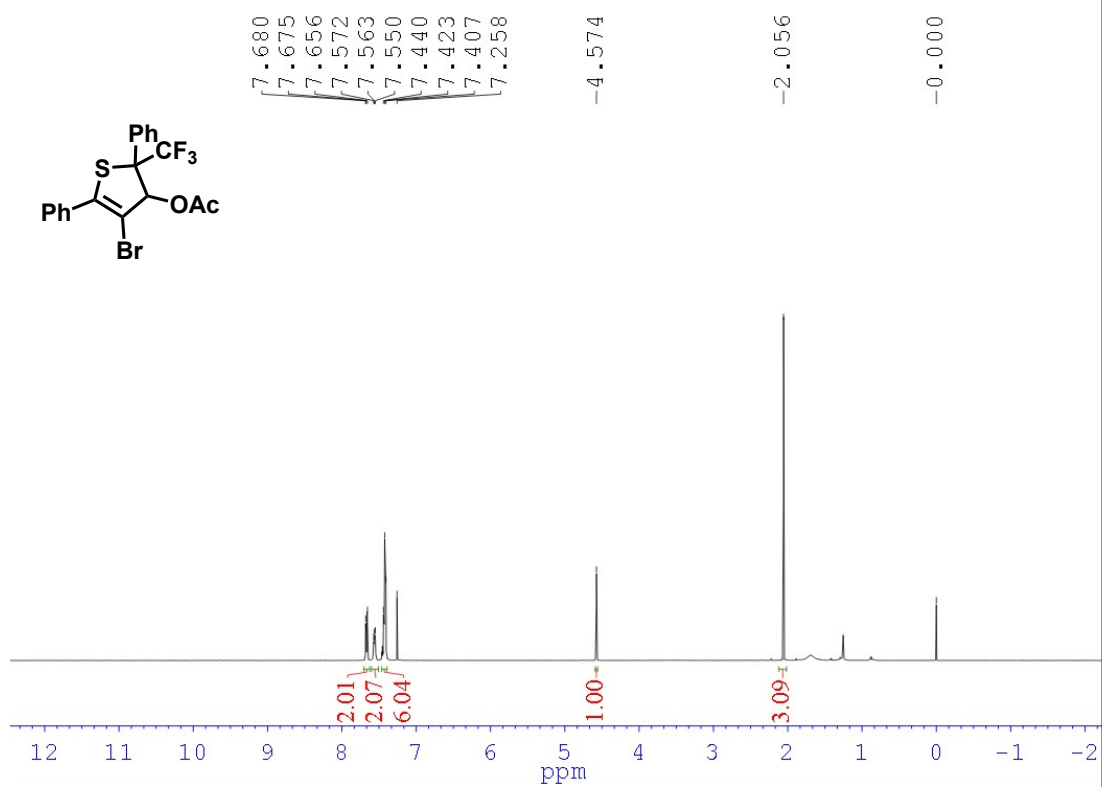

<sup>19</sup>F NMR spectra of **6**

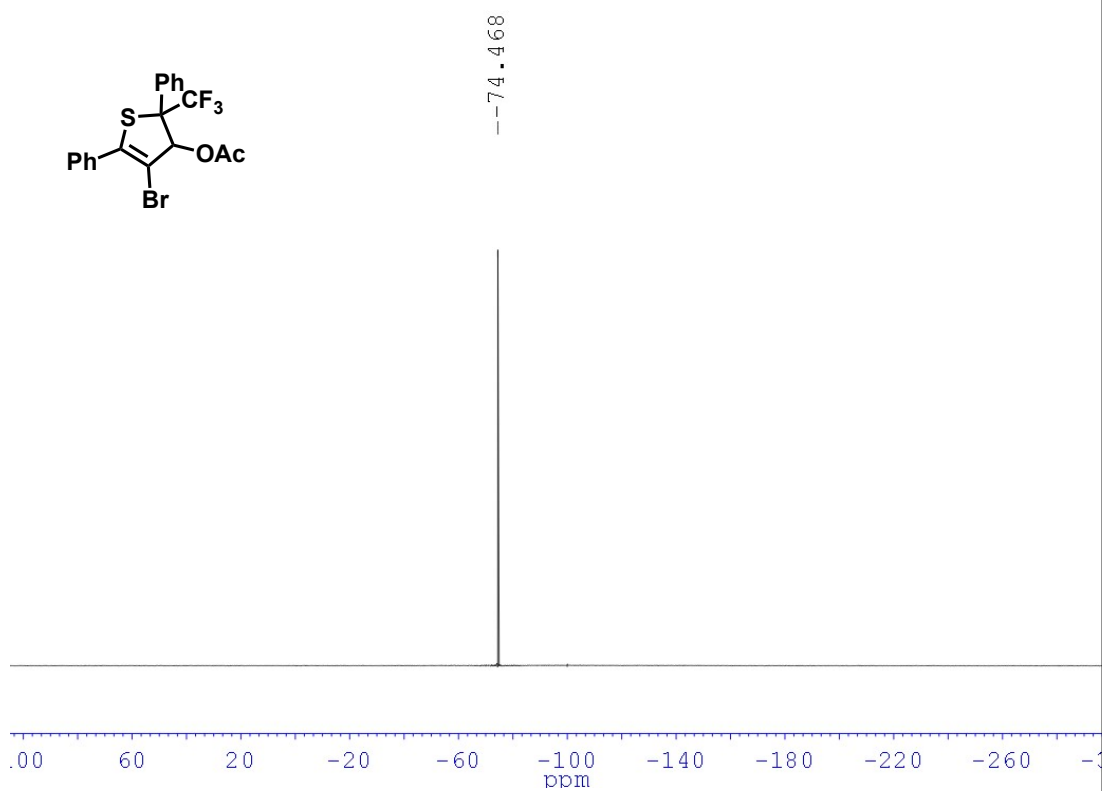



<sup>13</sup>C NMR spectra of **6**

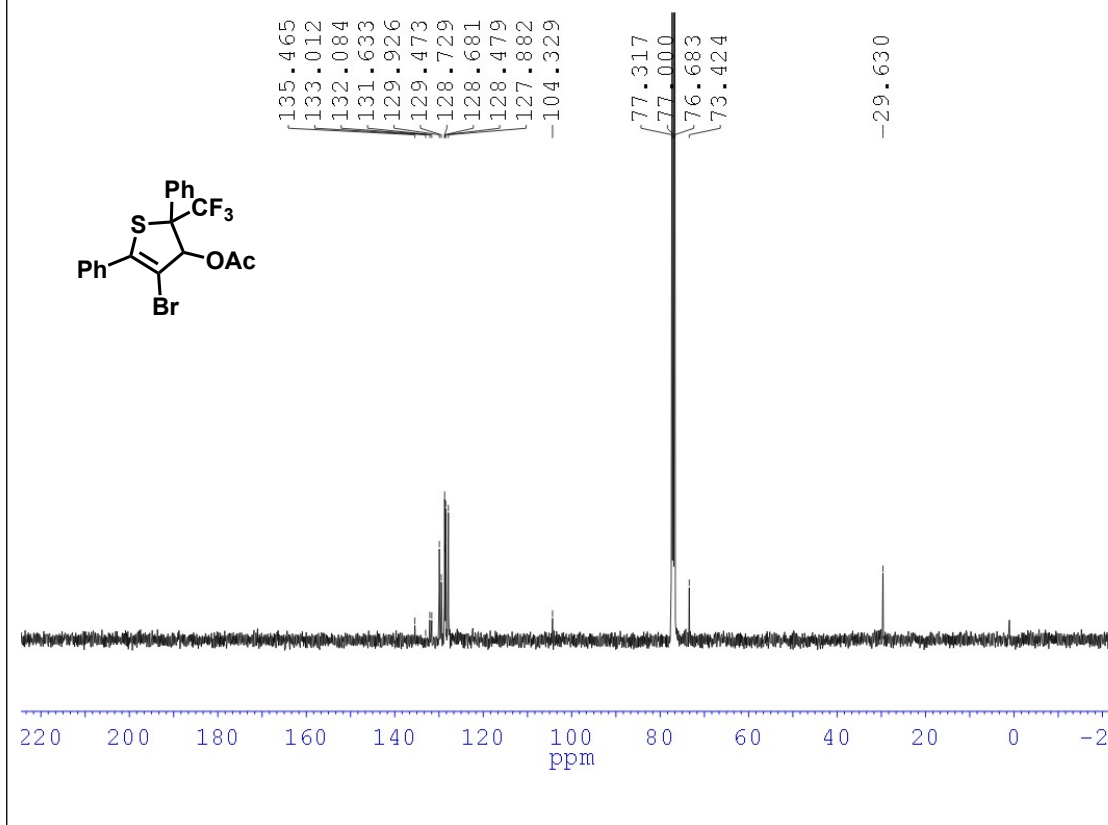

Supplement: d3ob00222e1.pdf [file d3ob00222e1.pdf]
